# Supplementary material for: Predicting Climate Change Impacts on the Amount and Duration of Autumn Colors in a New England Forest
Source: PubMed Central journal article supplement (PMC3592872; doi:10.1371/journal.pone.0057373), 2013-03-08

# *Acer rubrum*

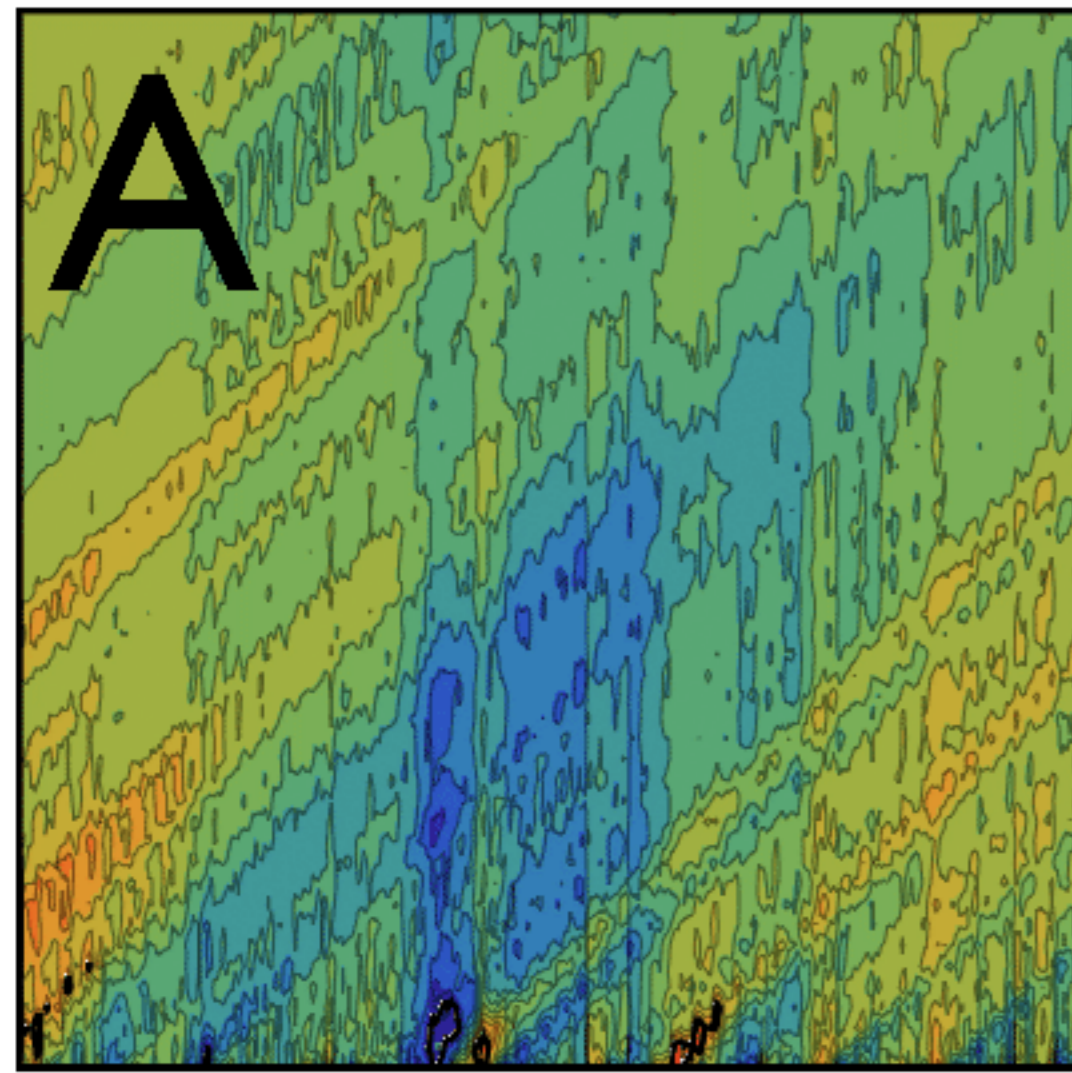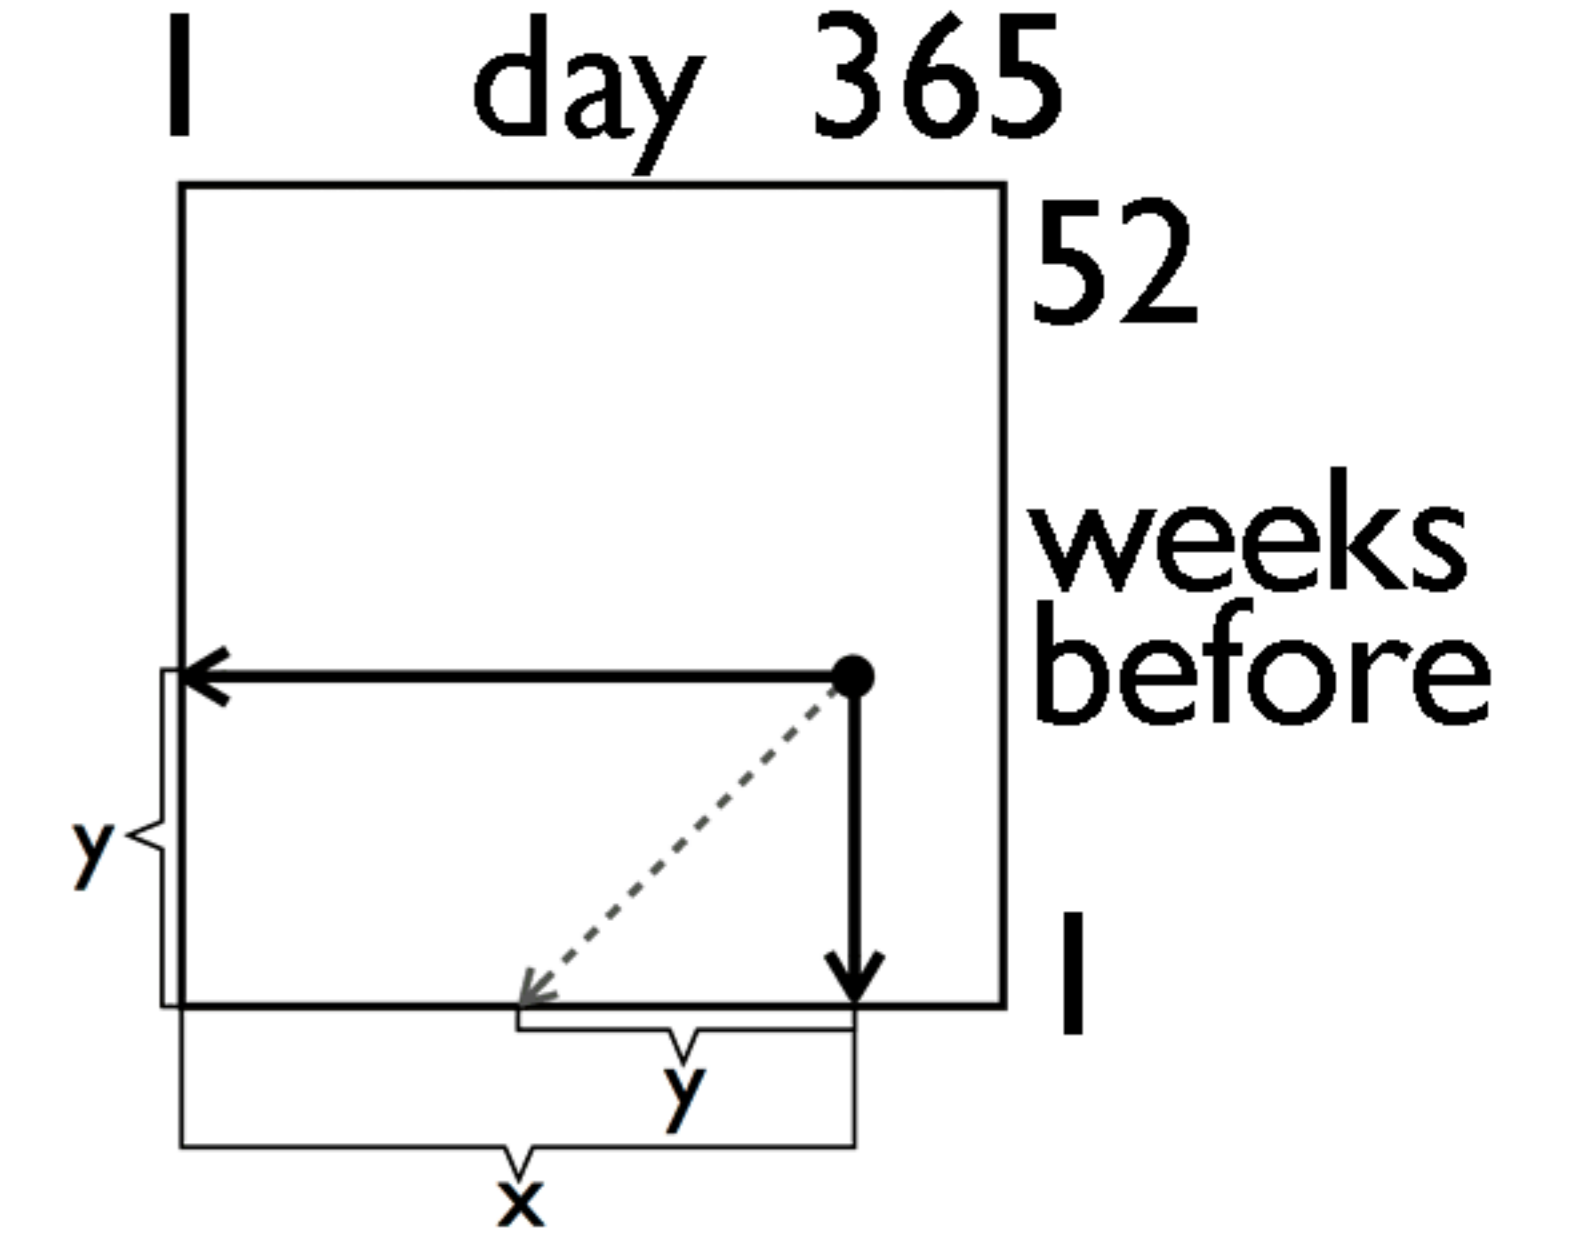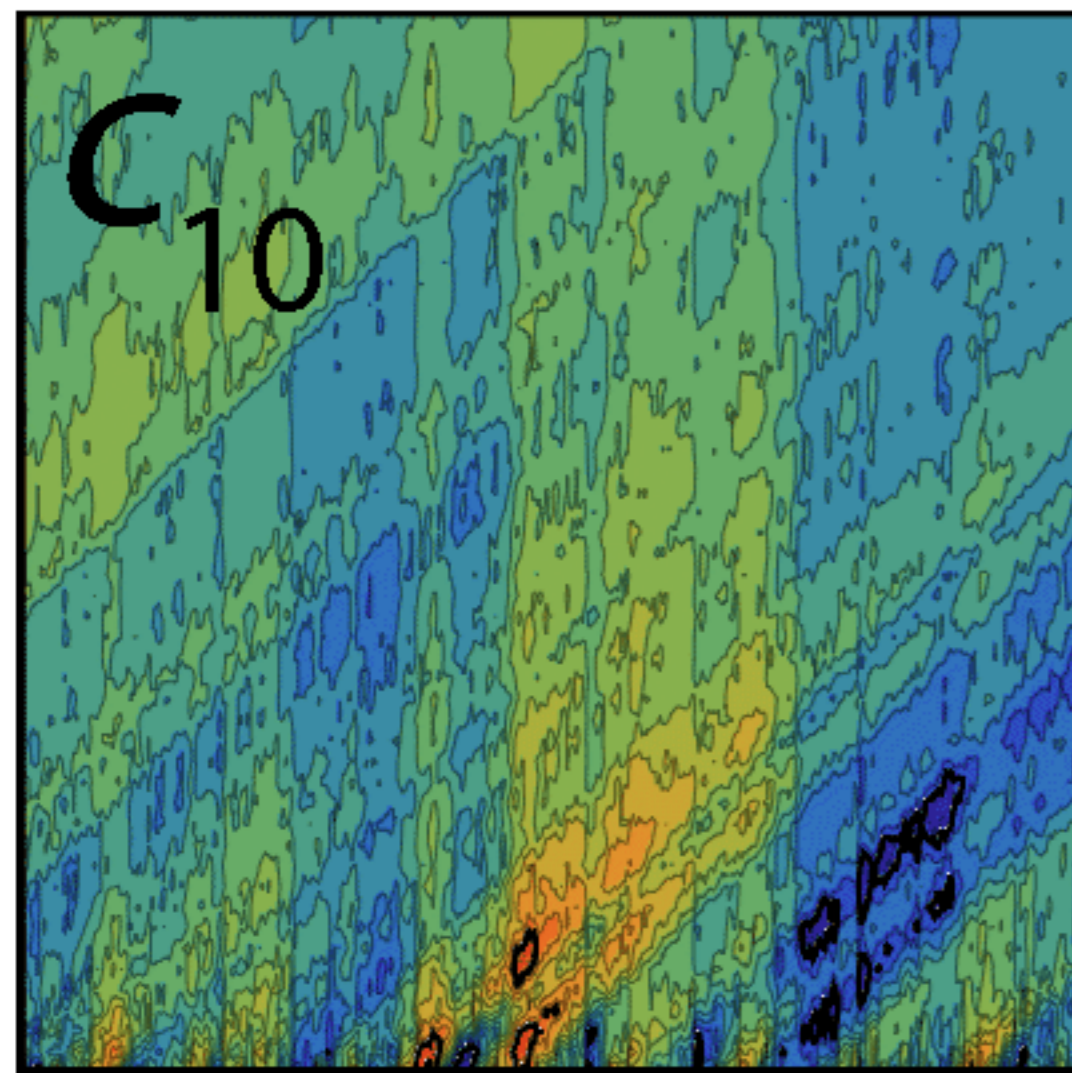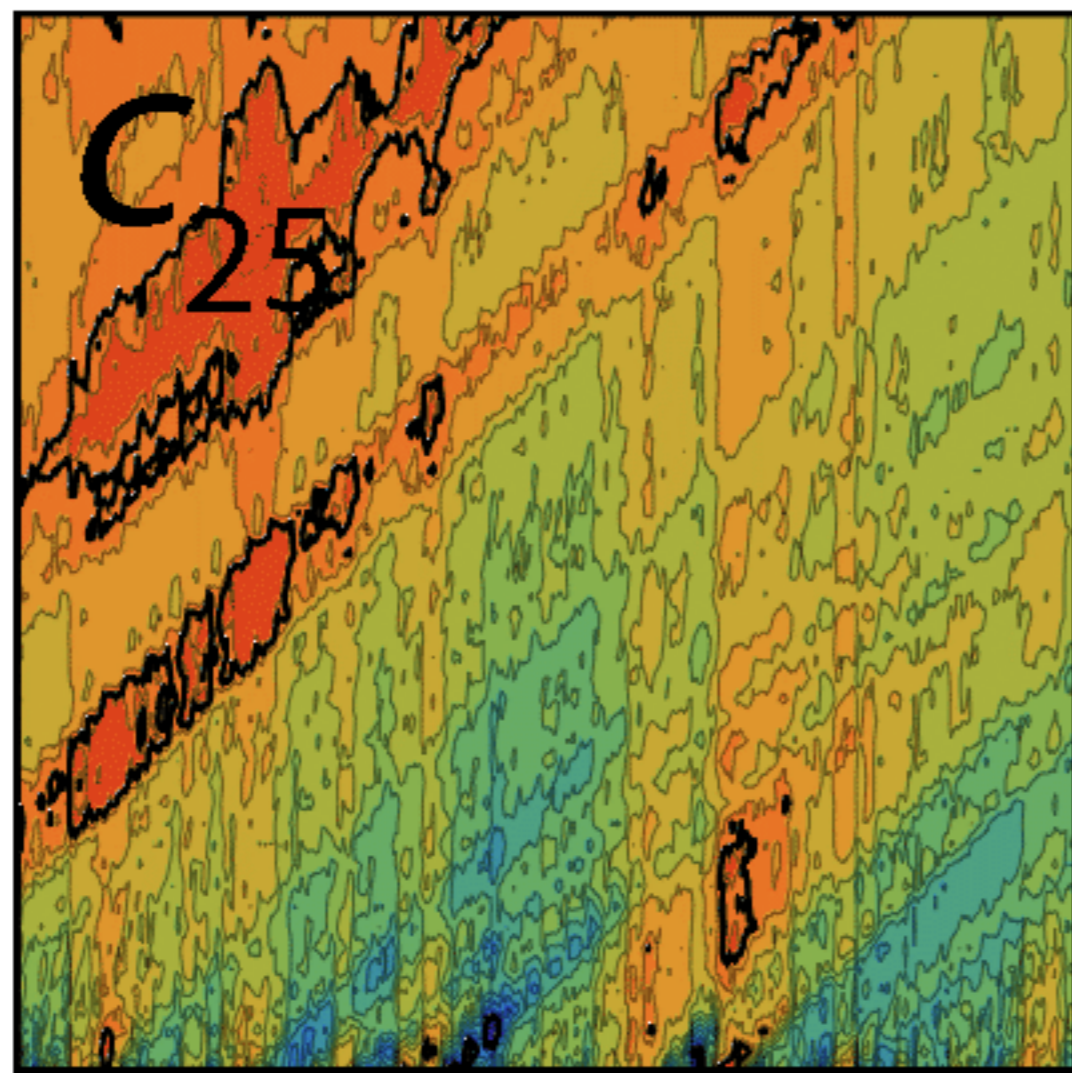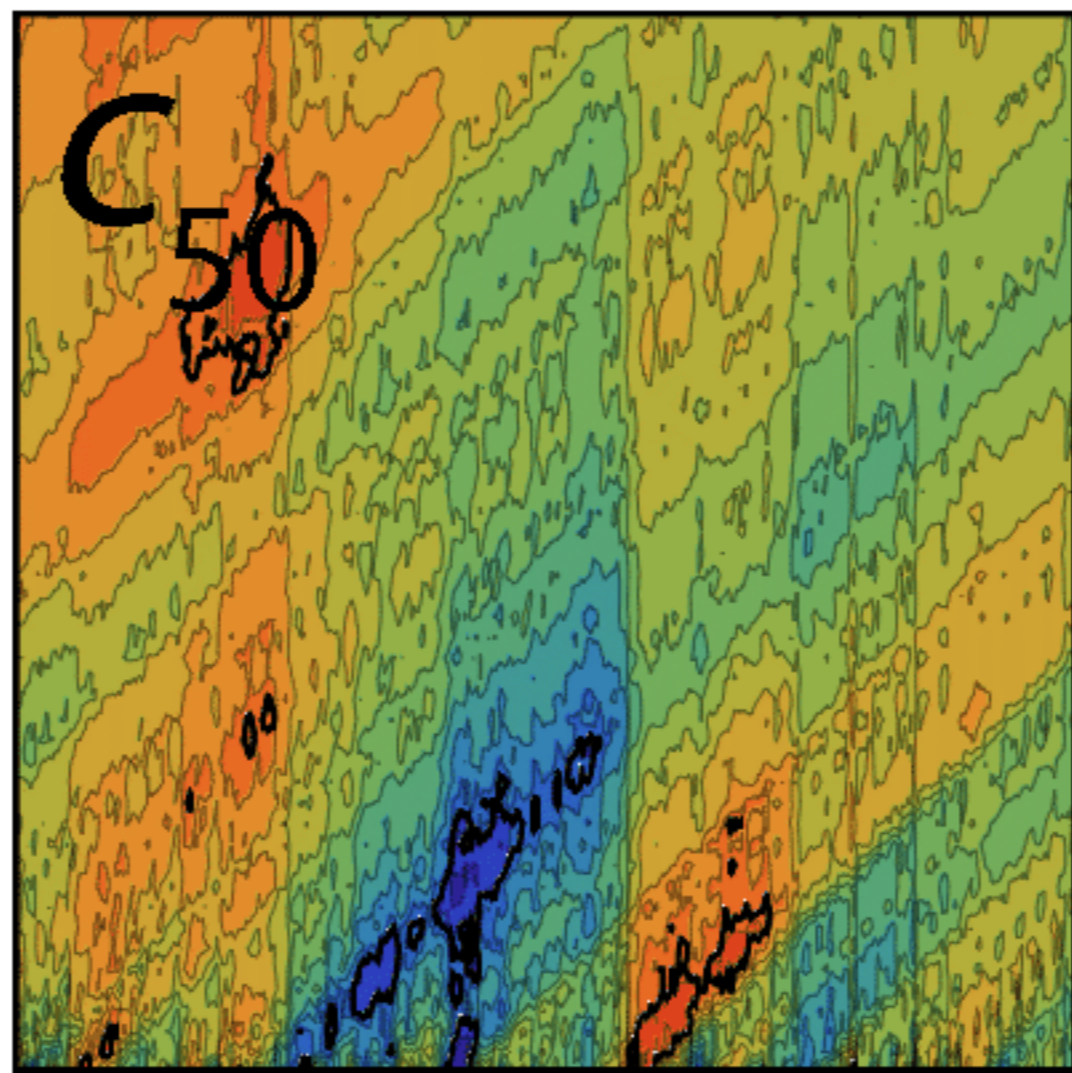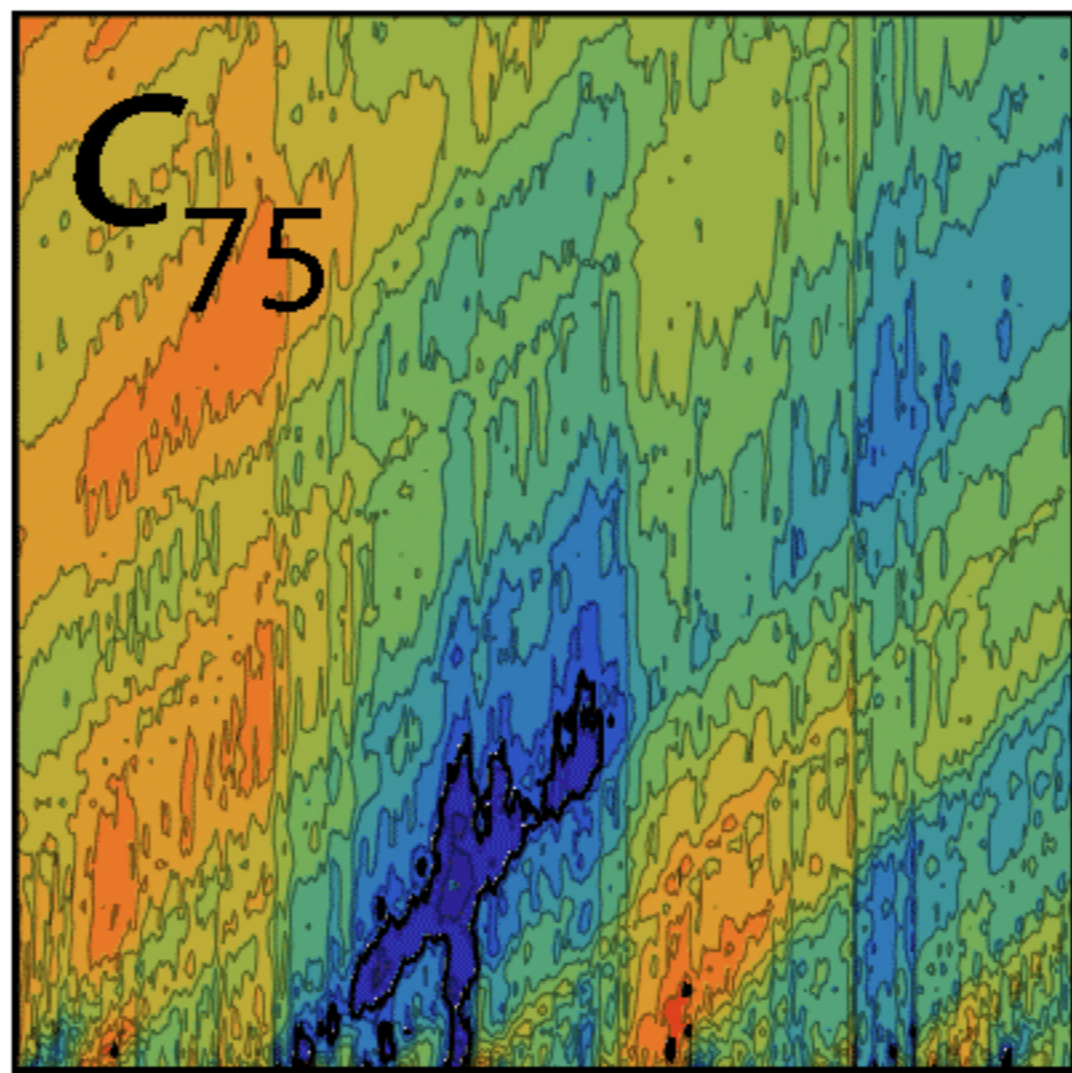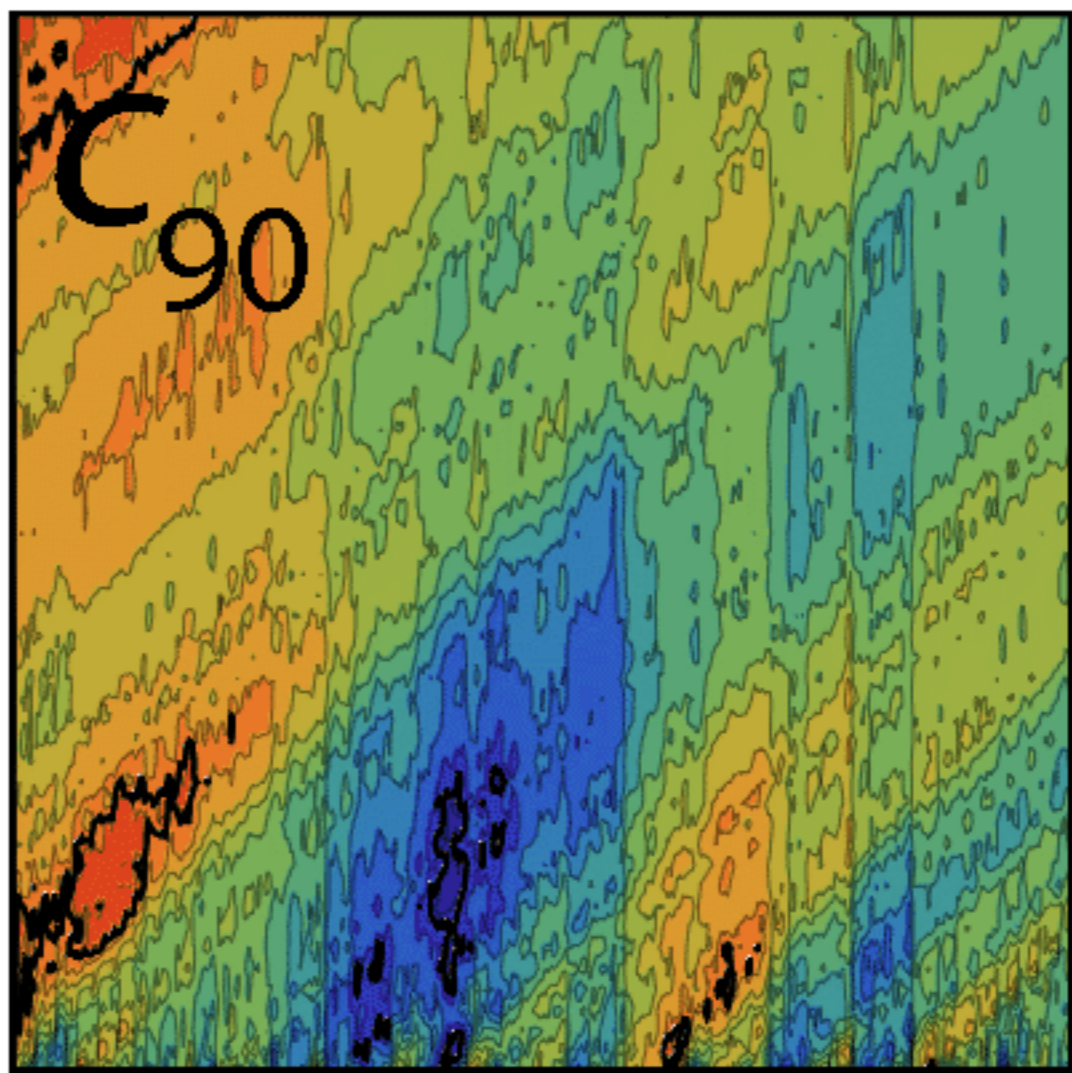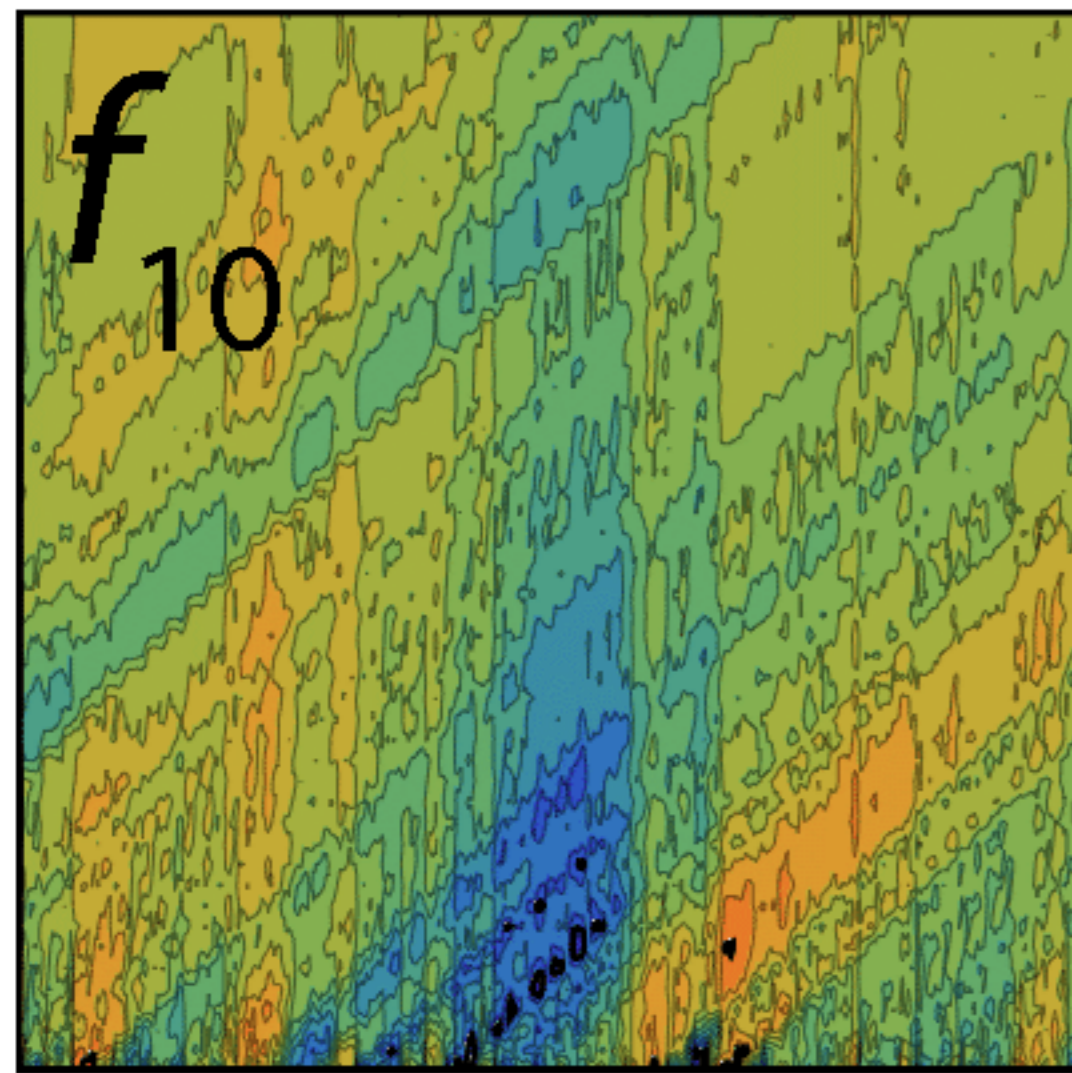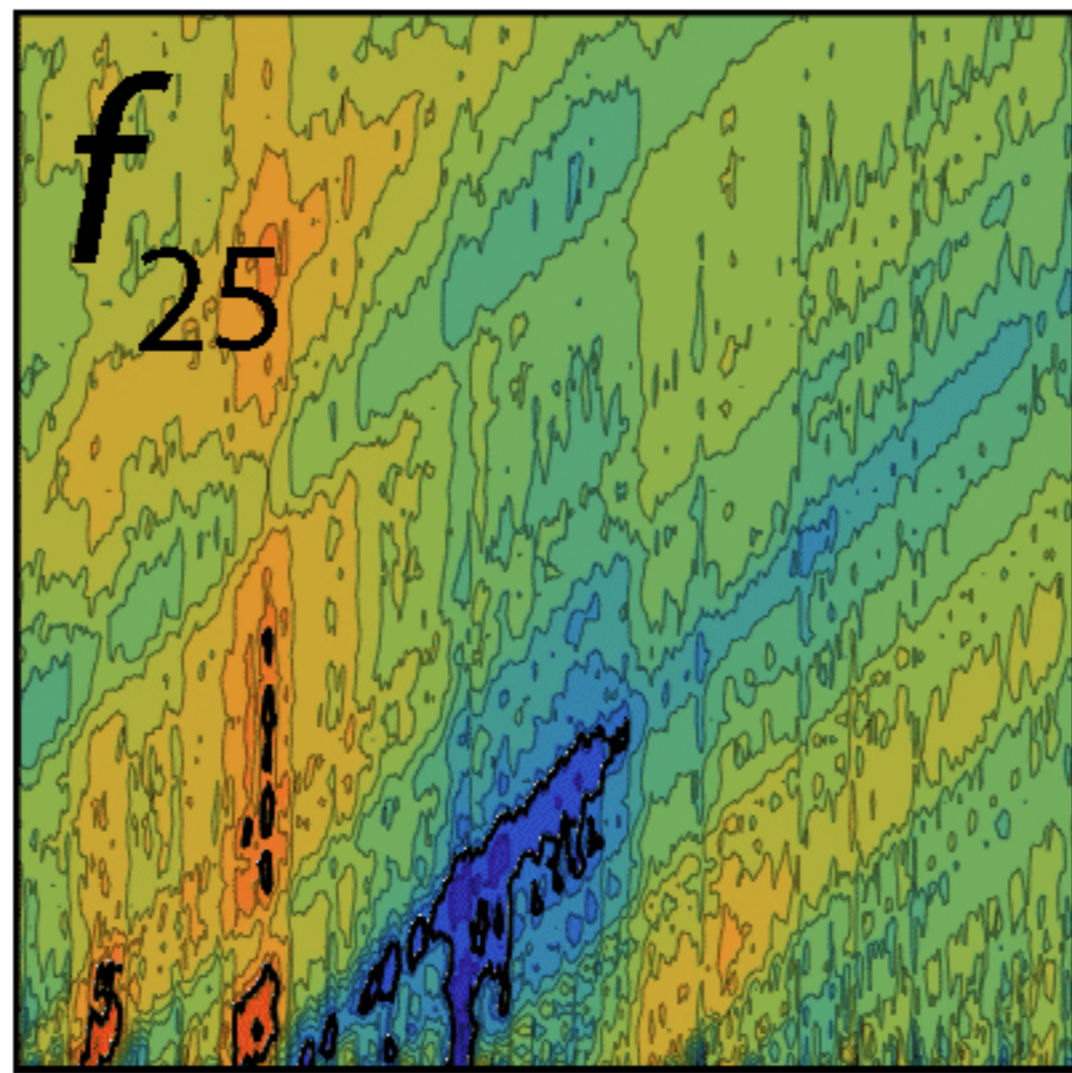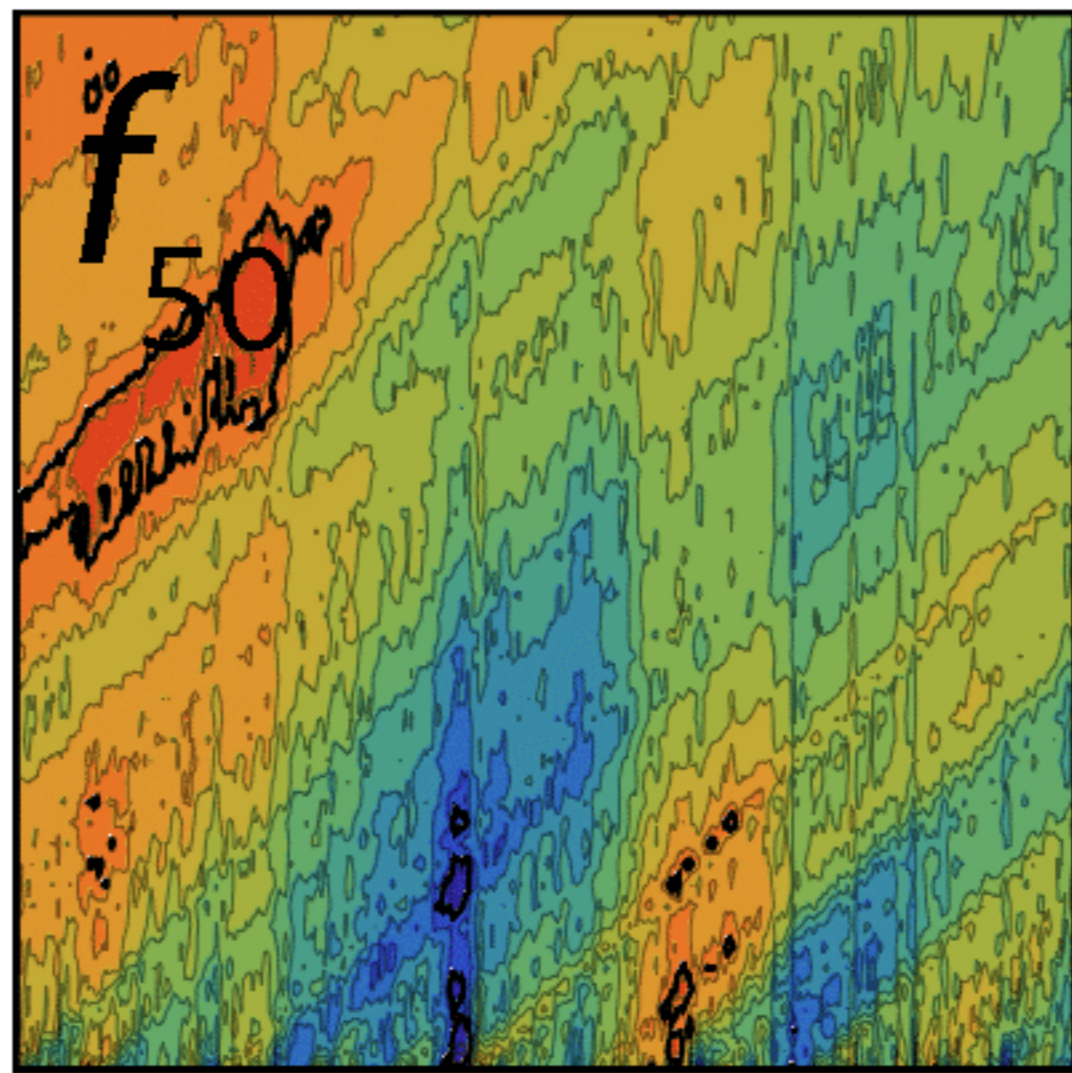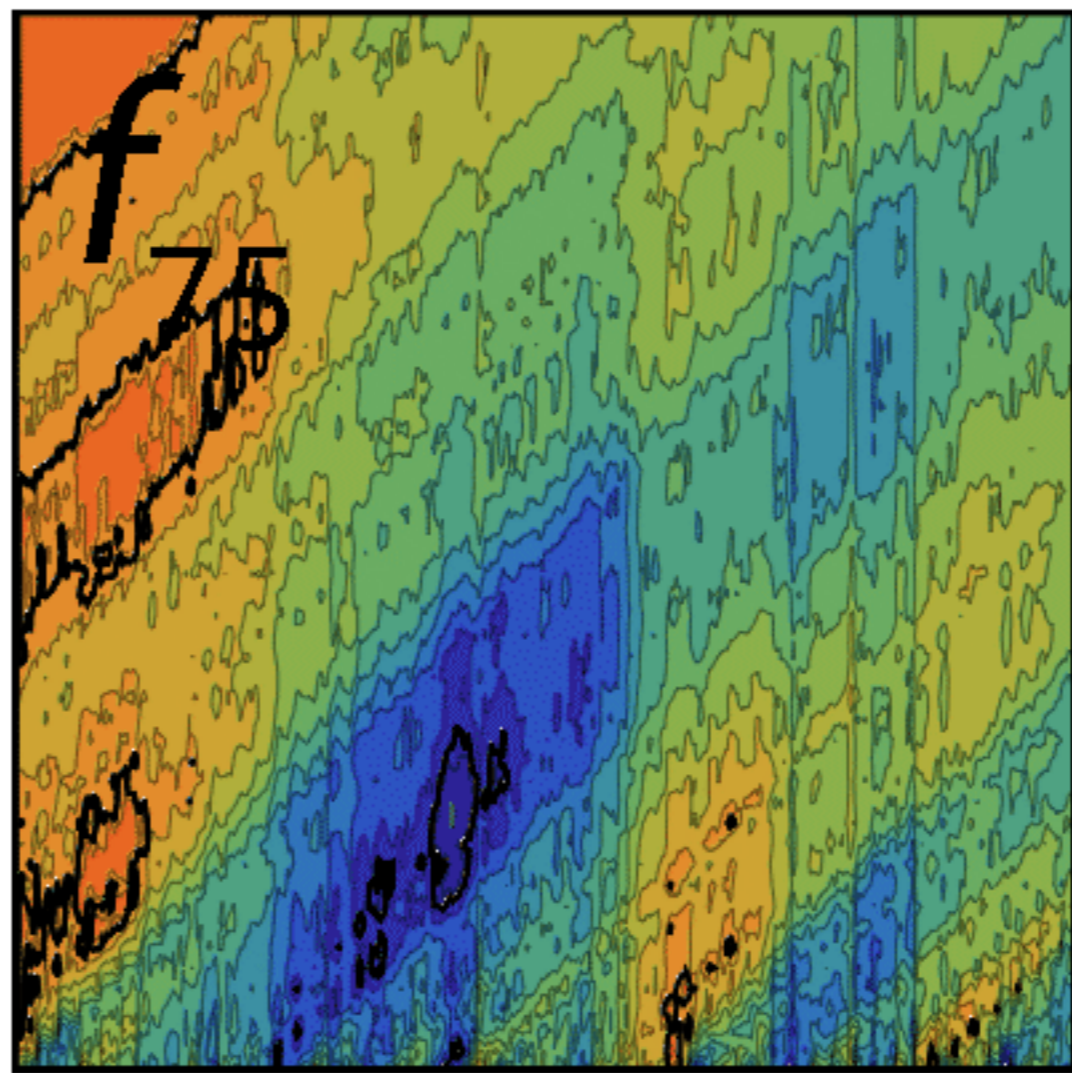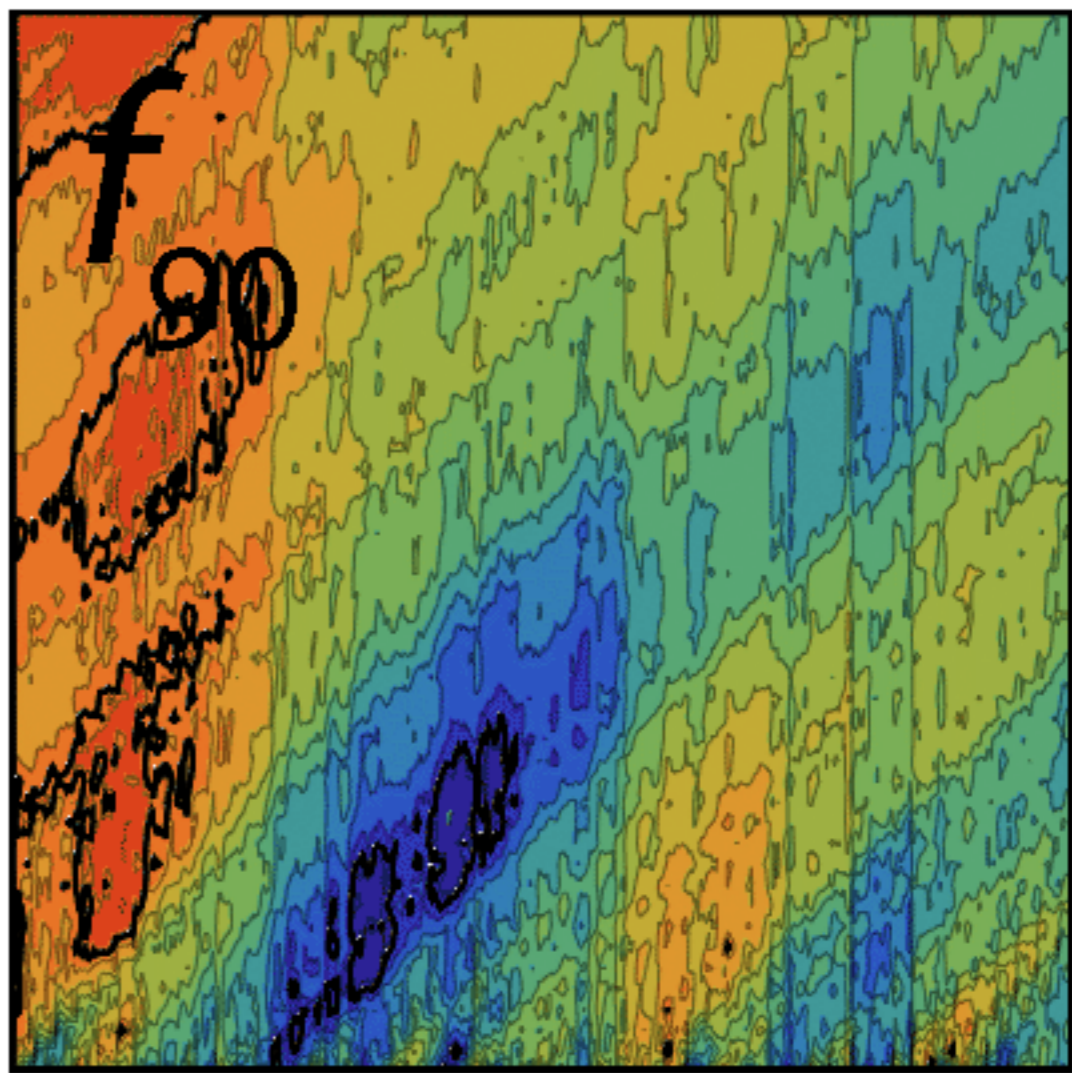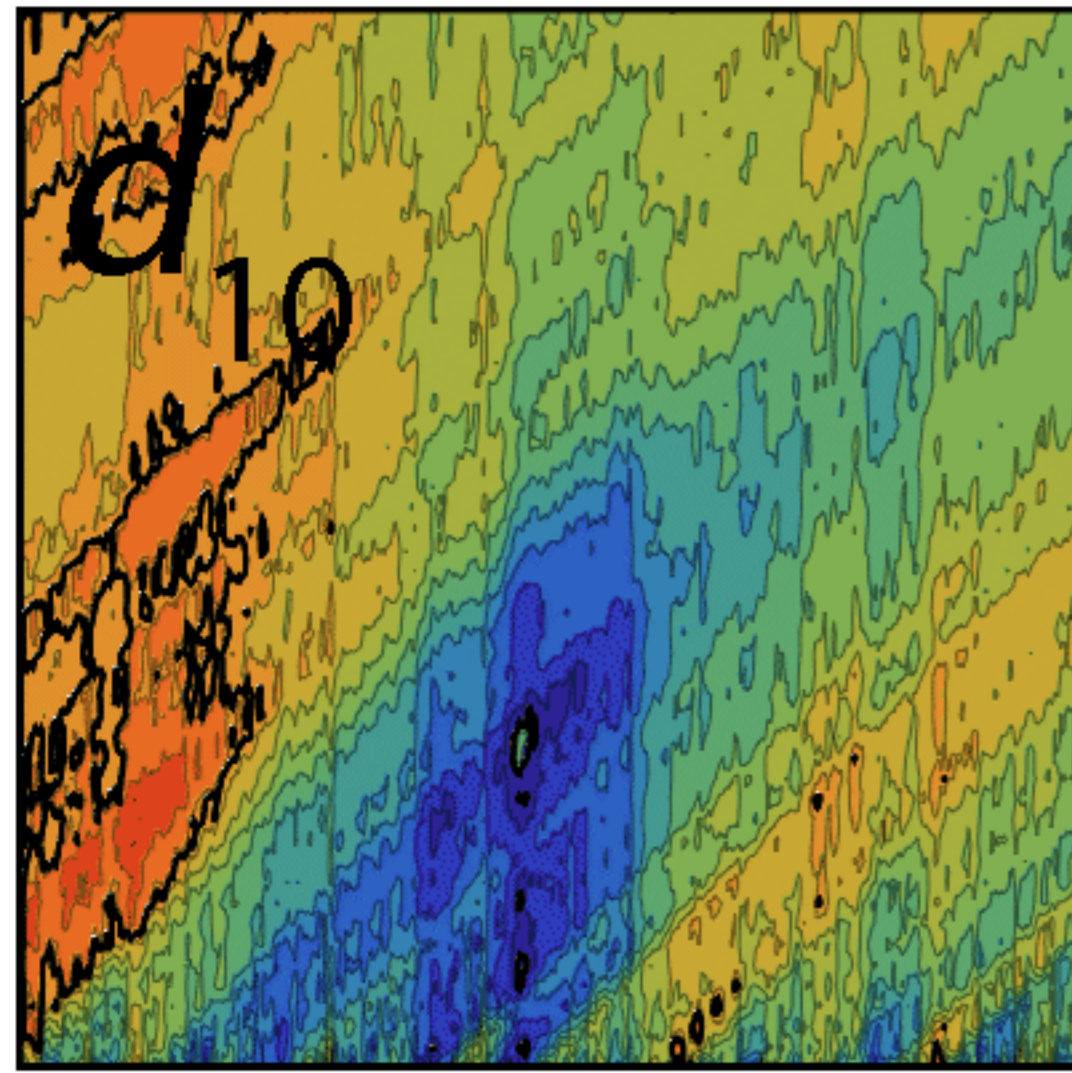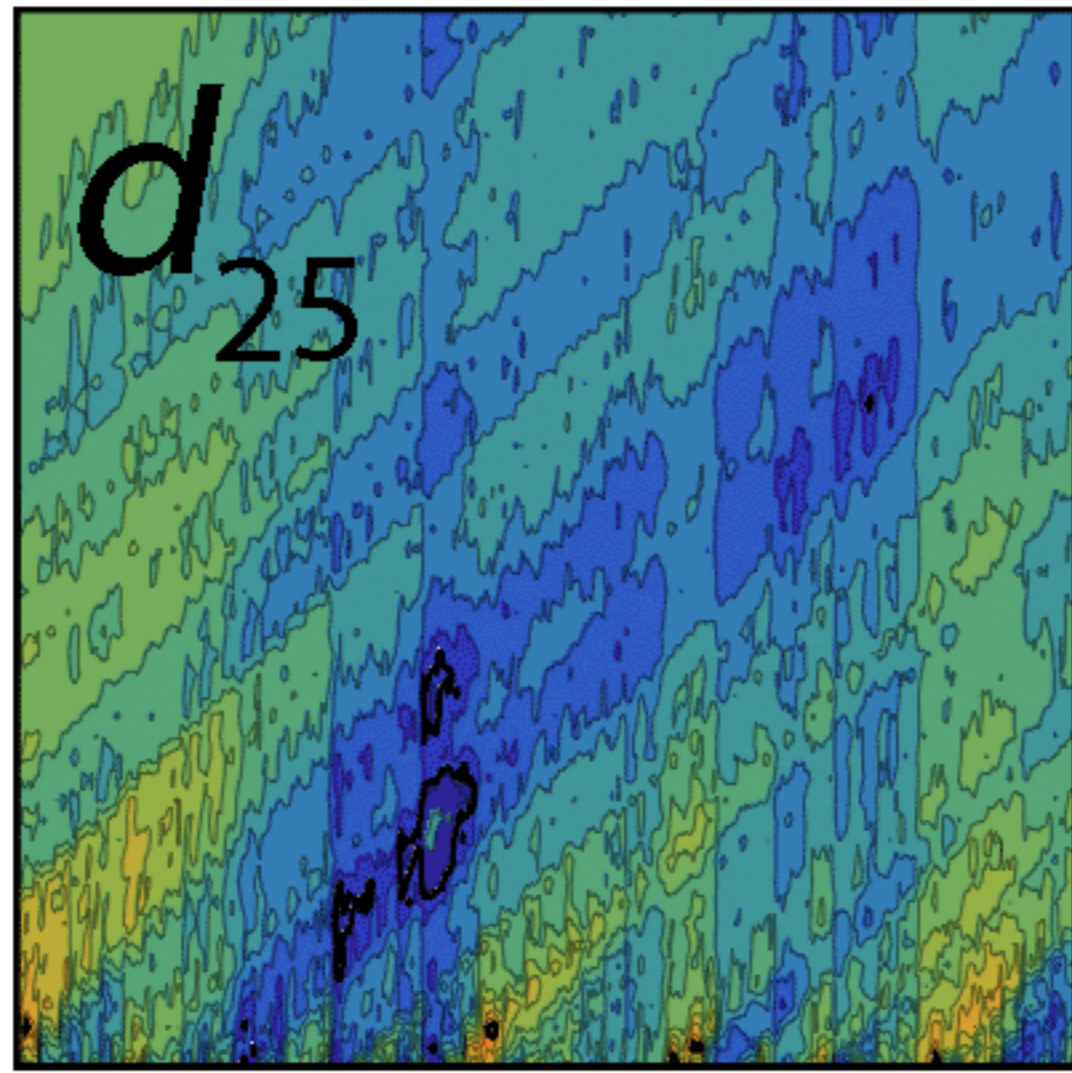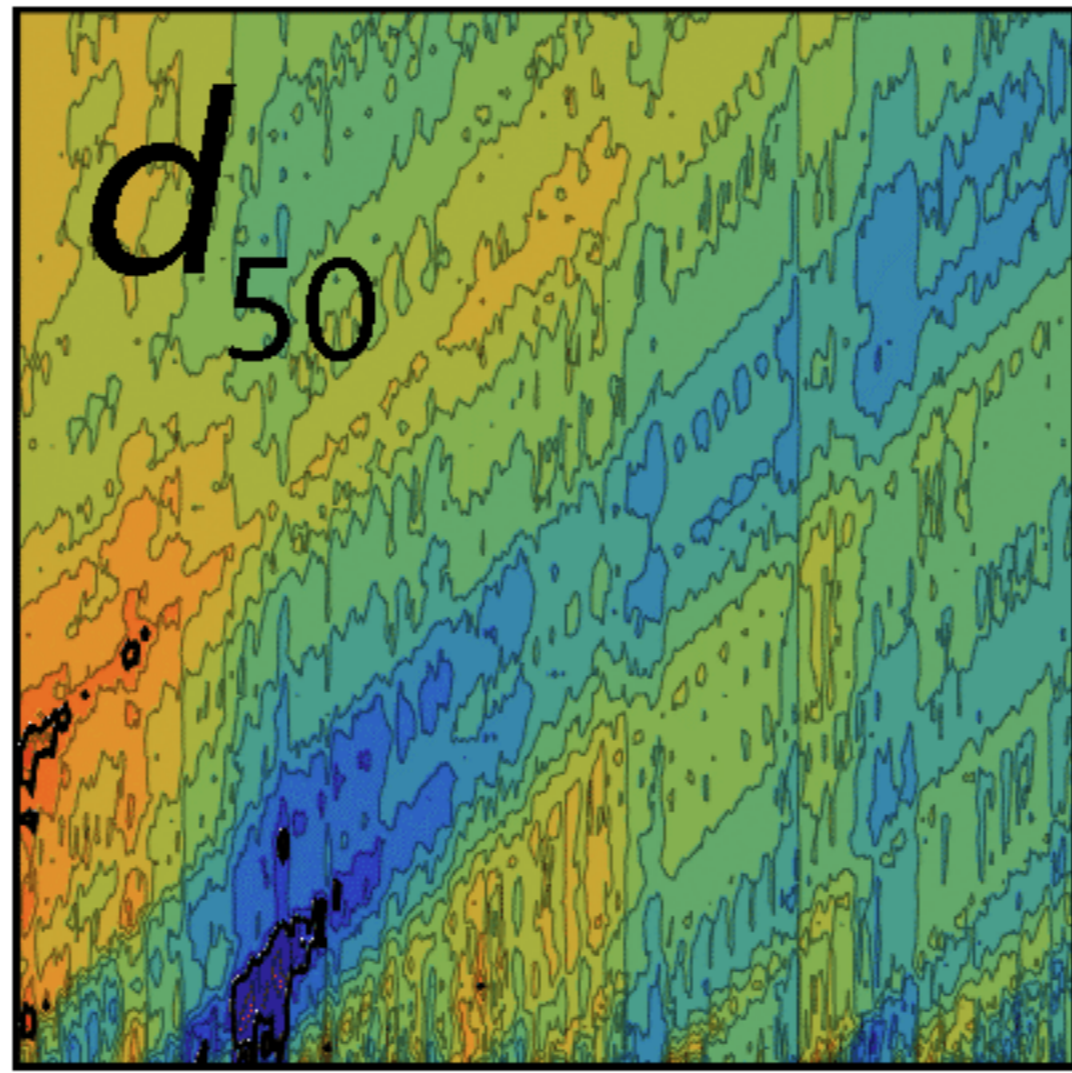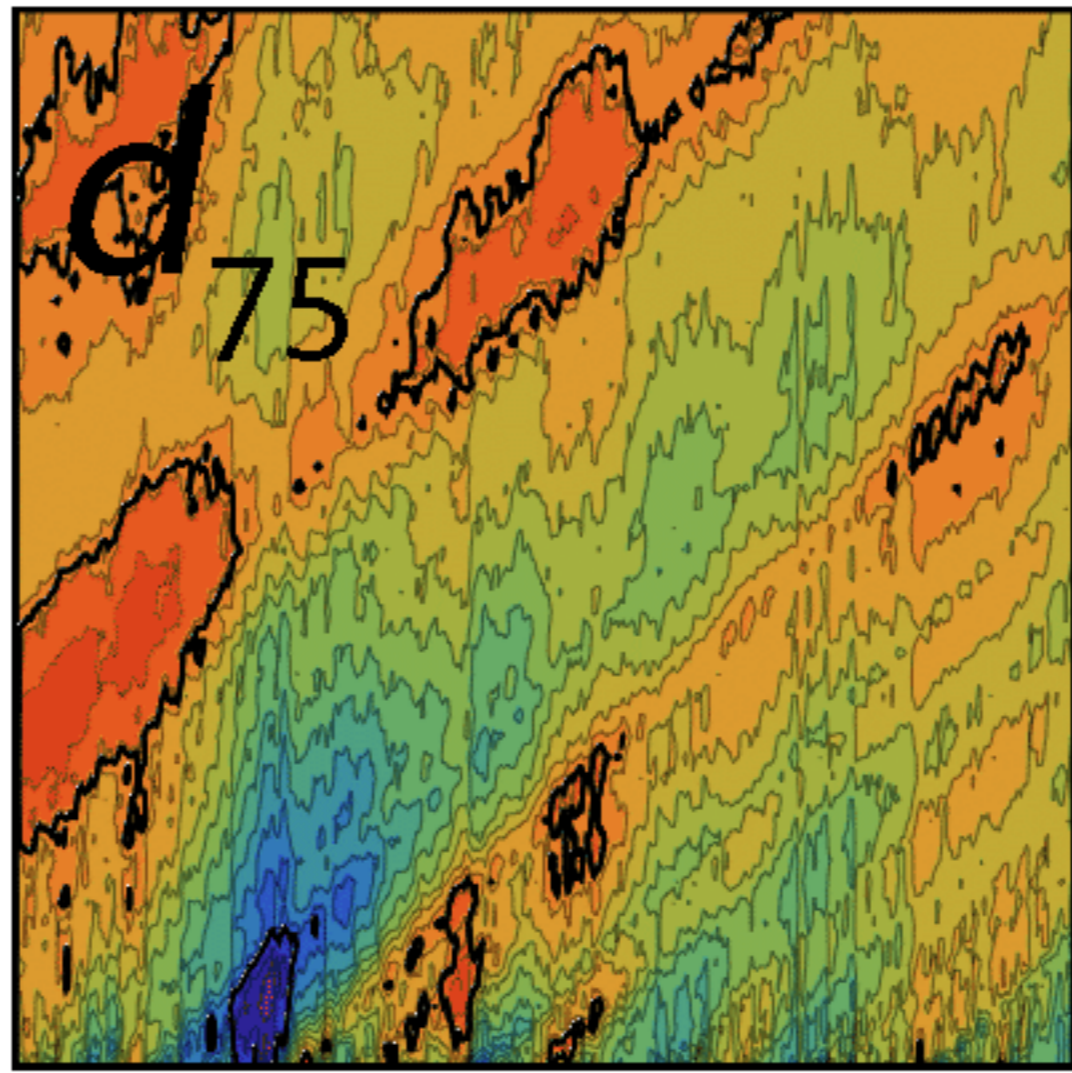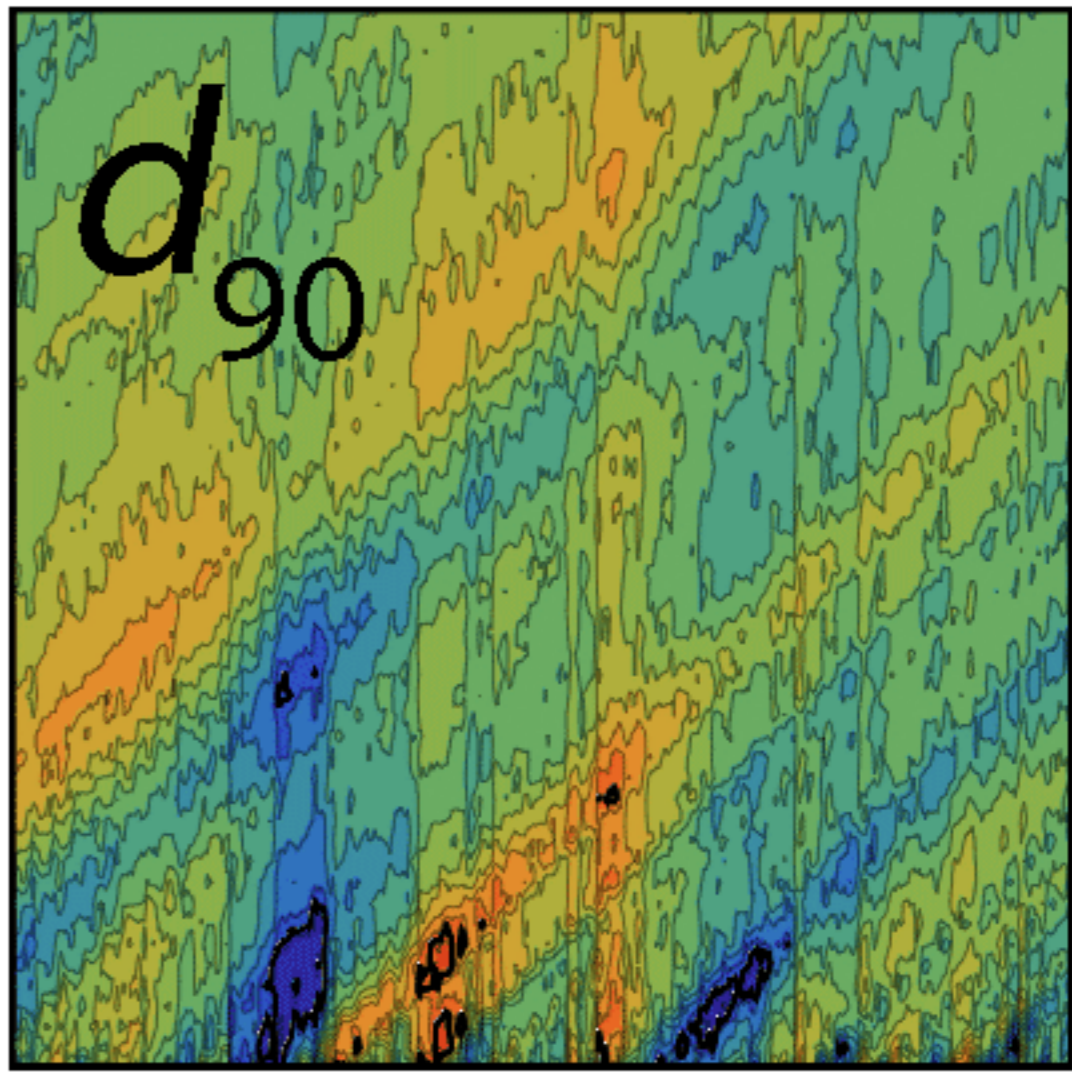

# *Acer saccharum*

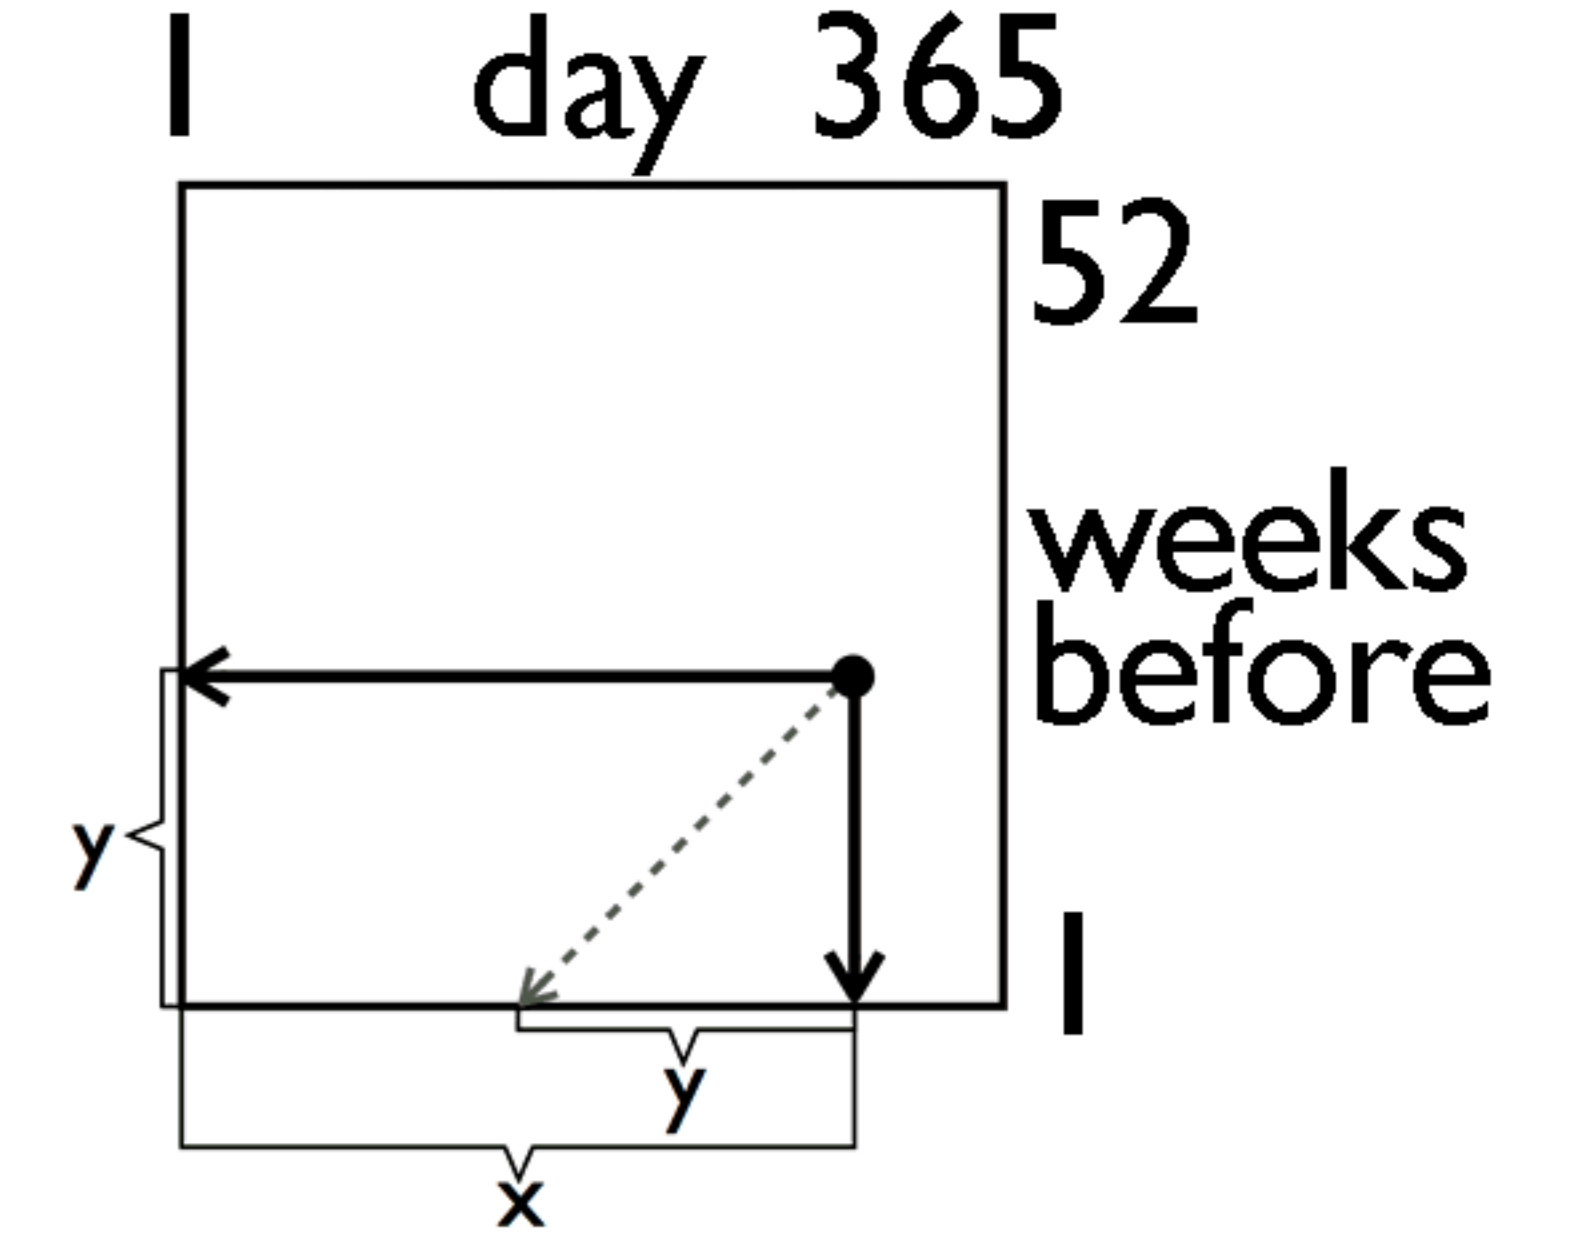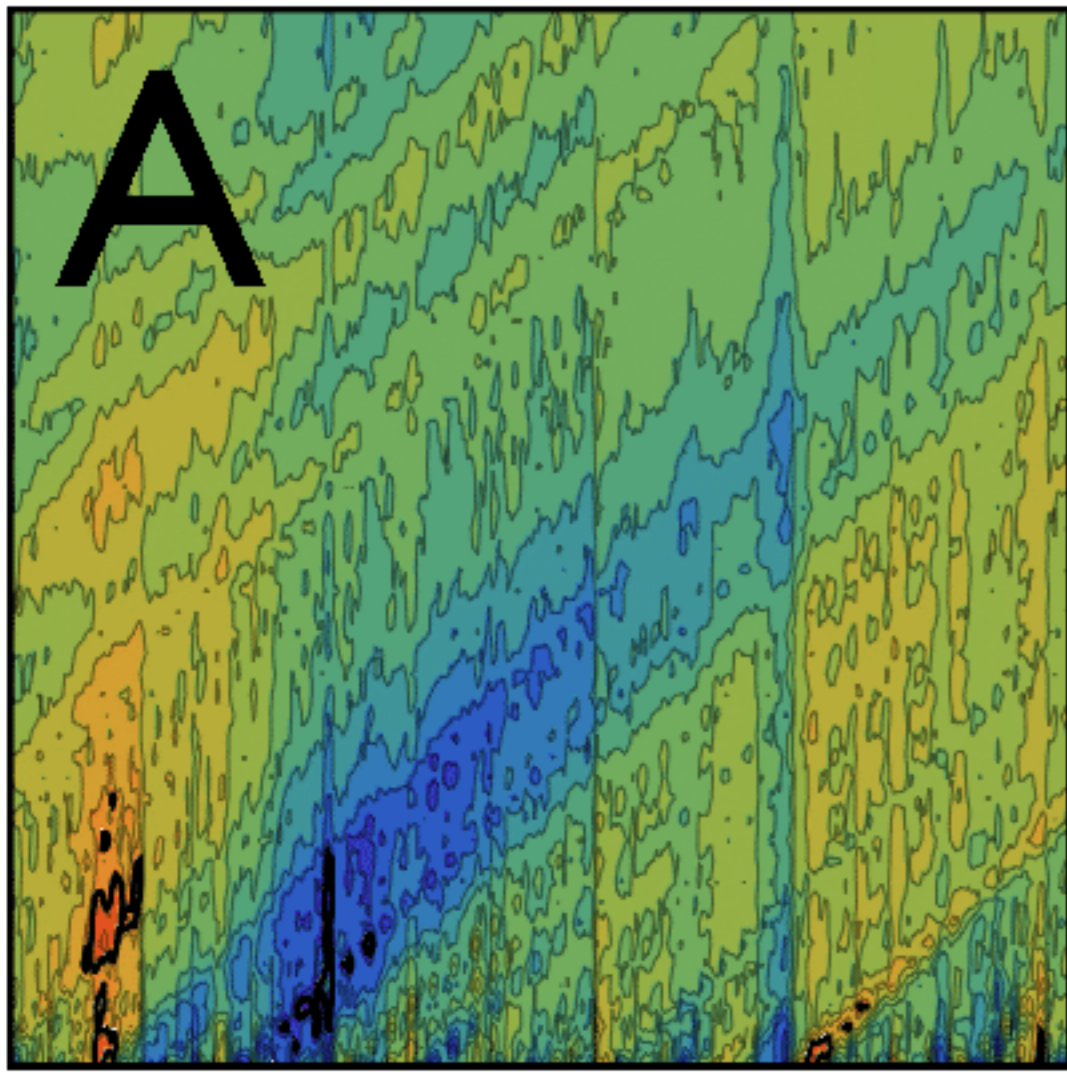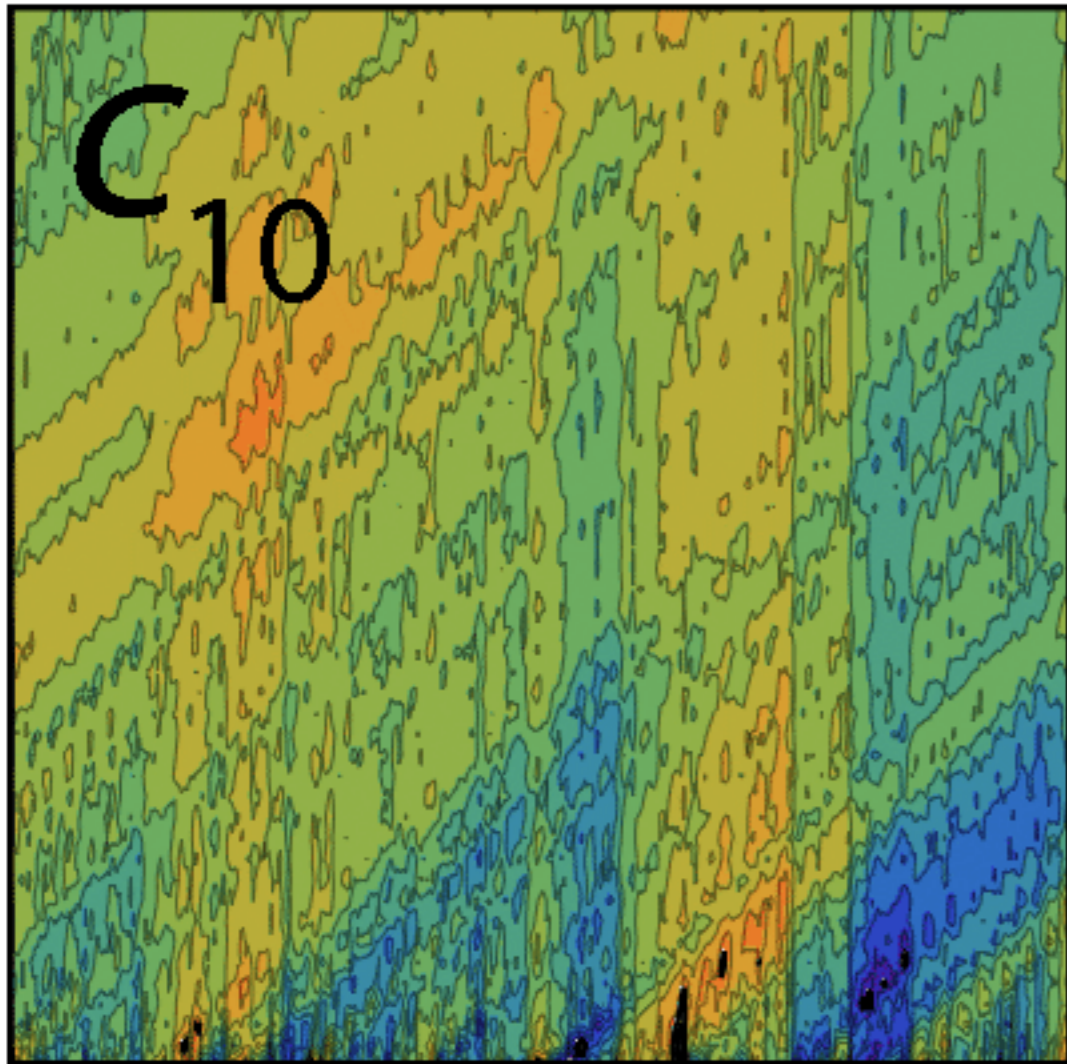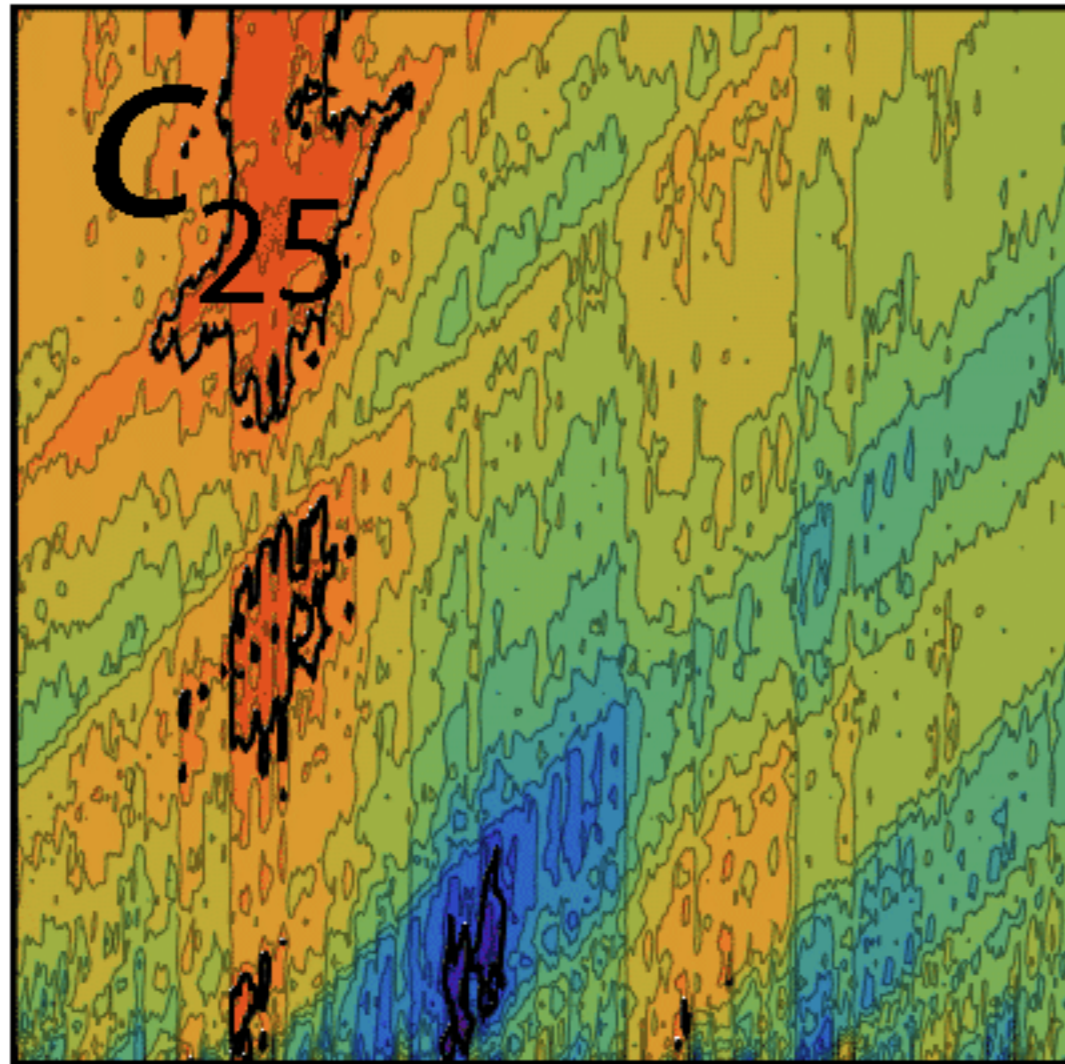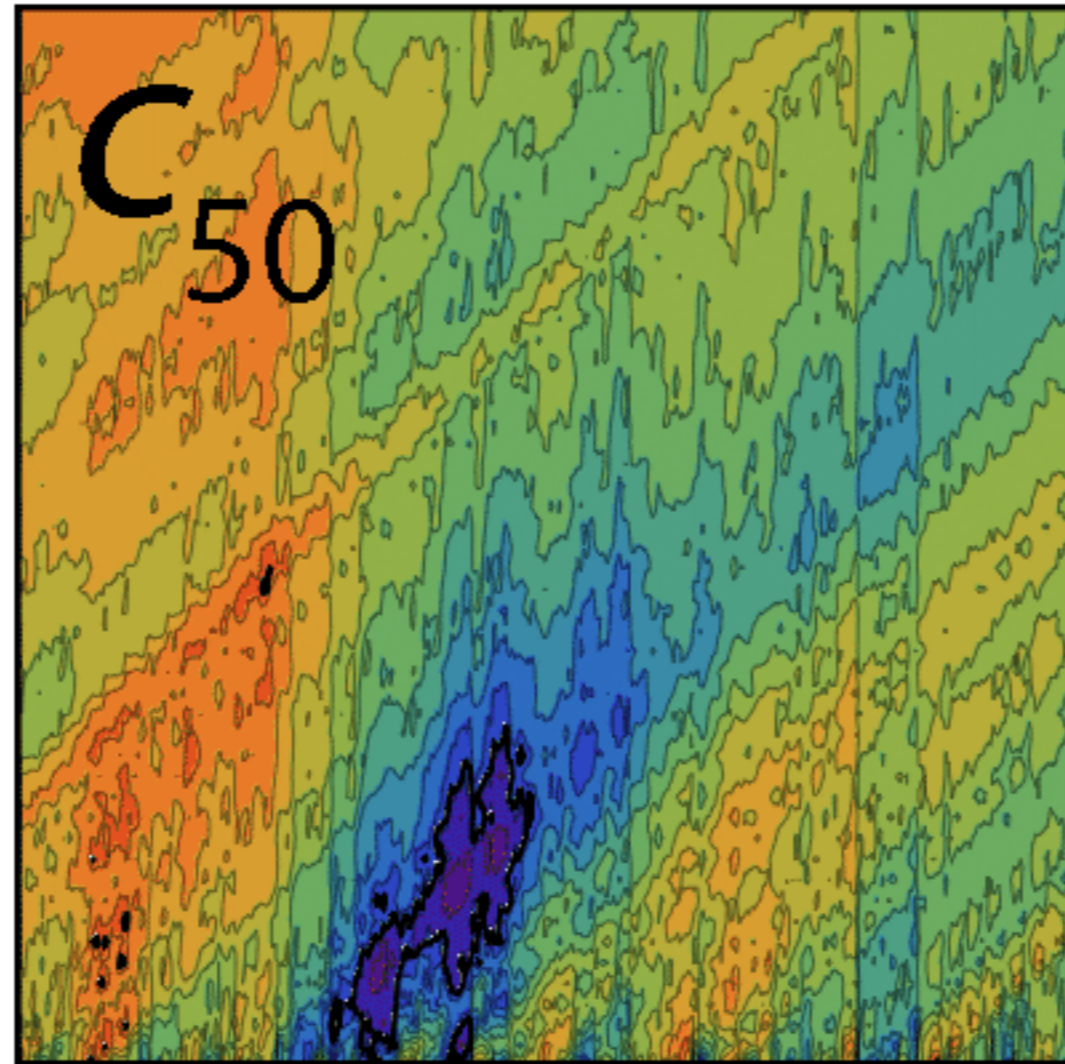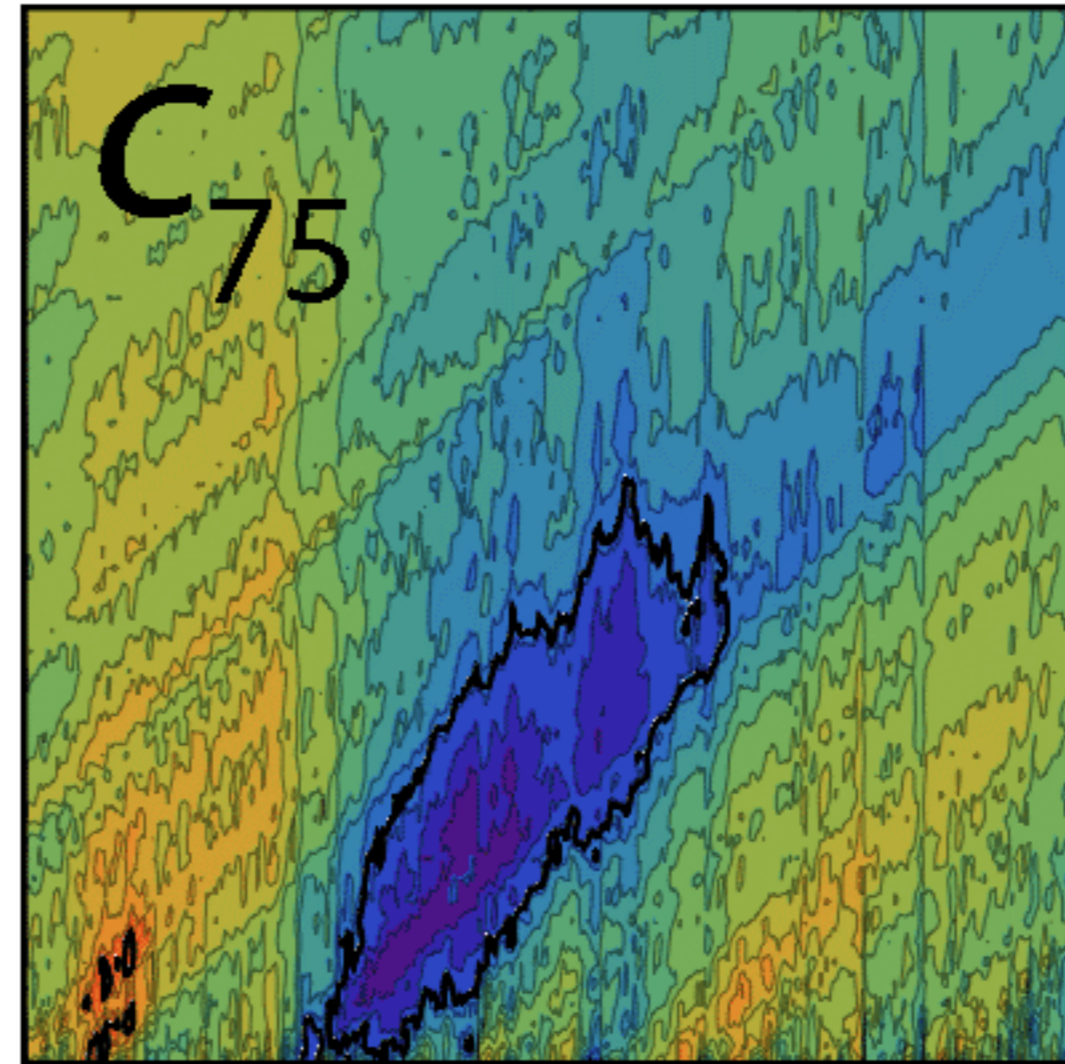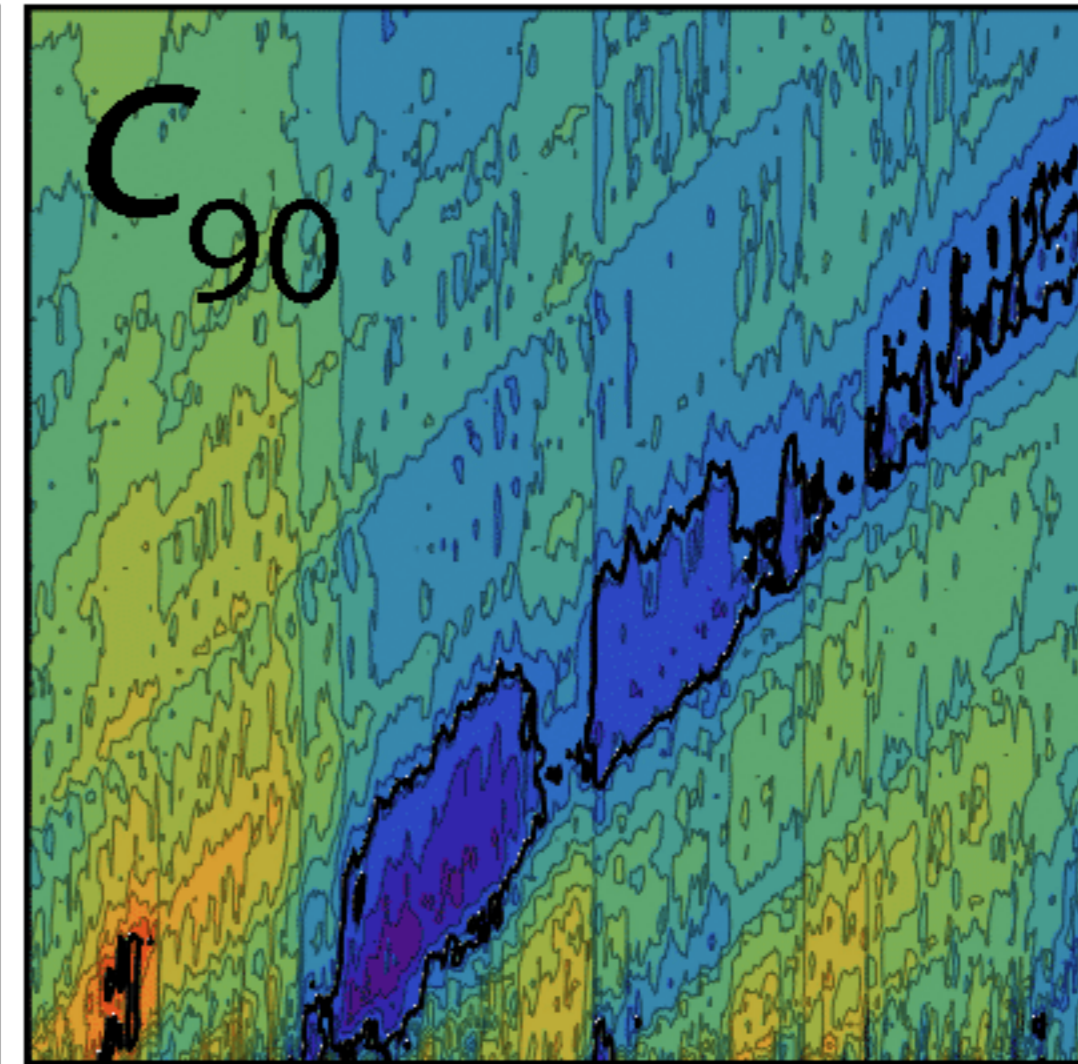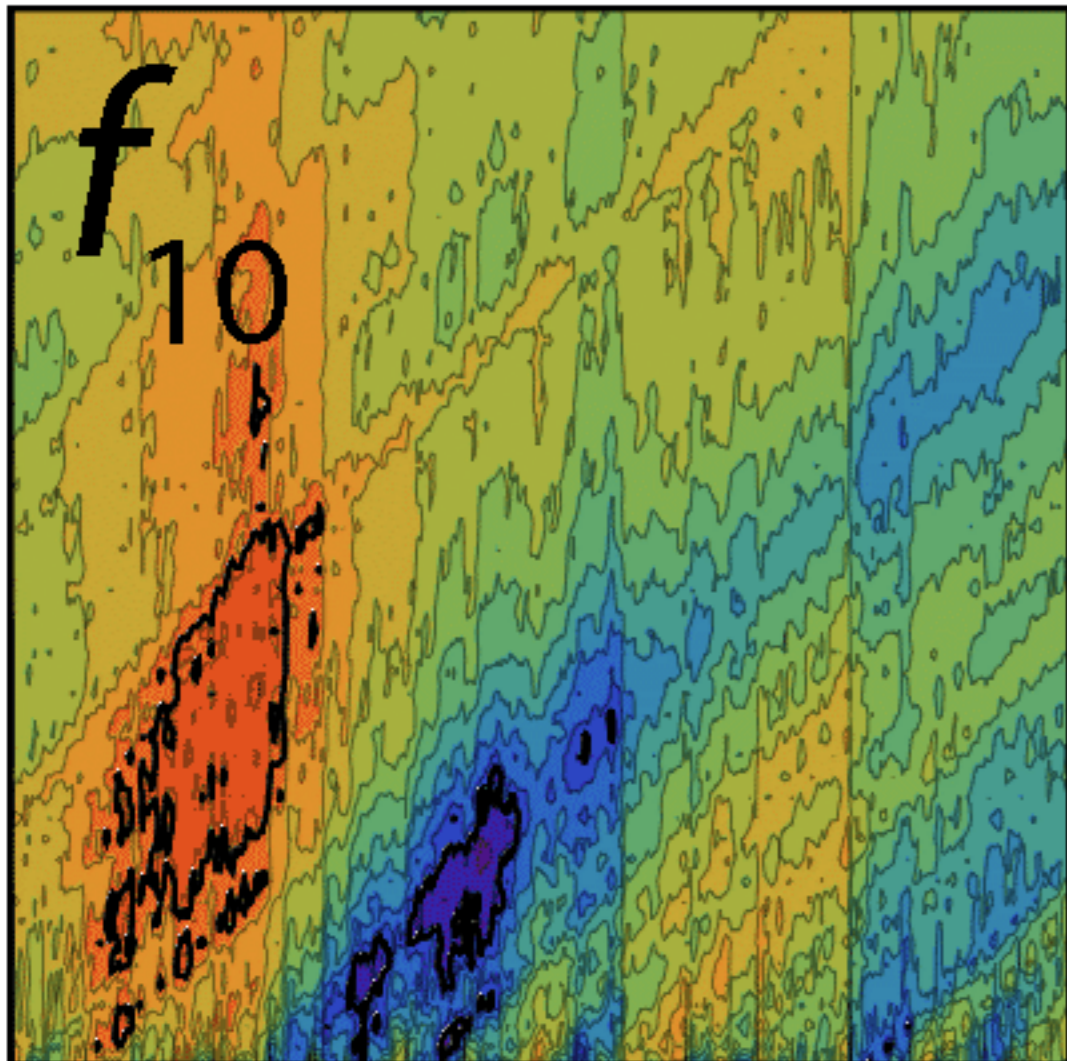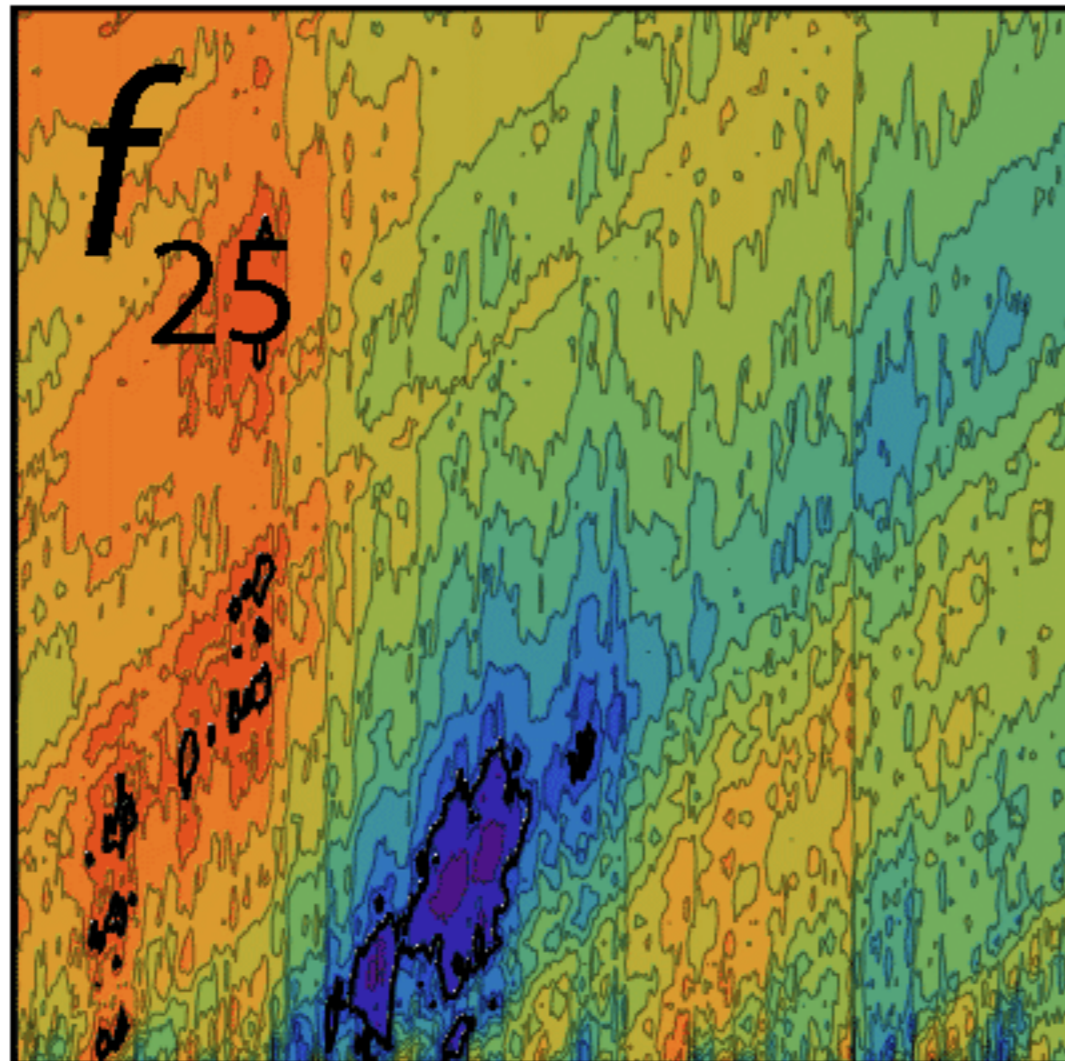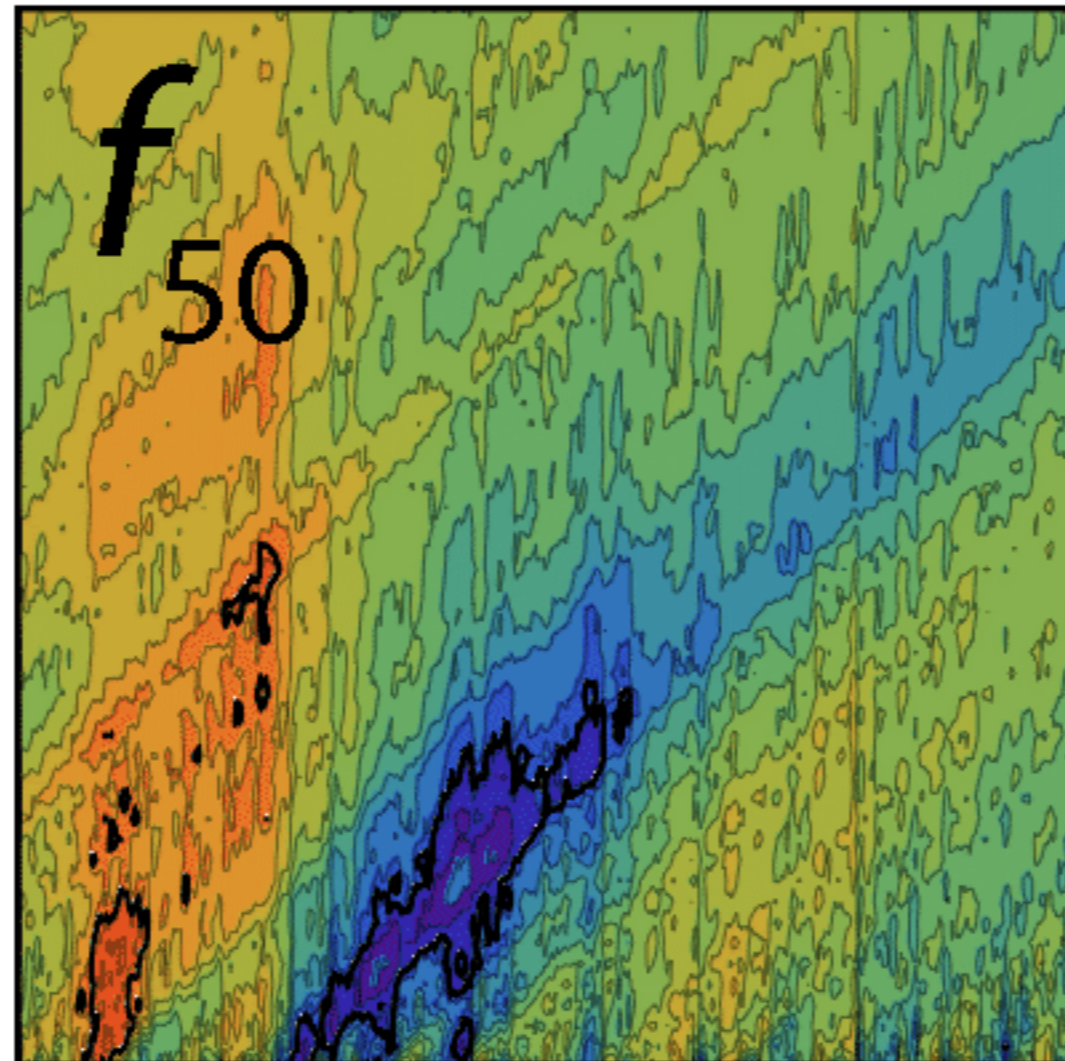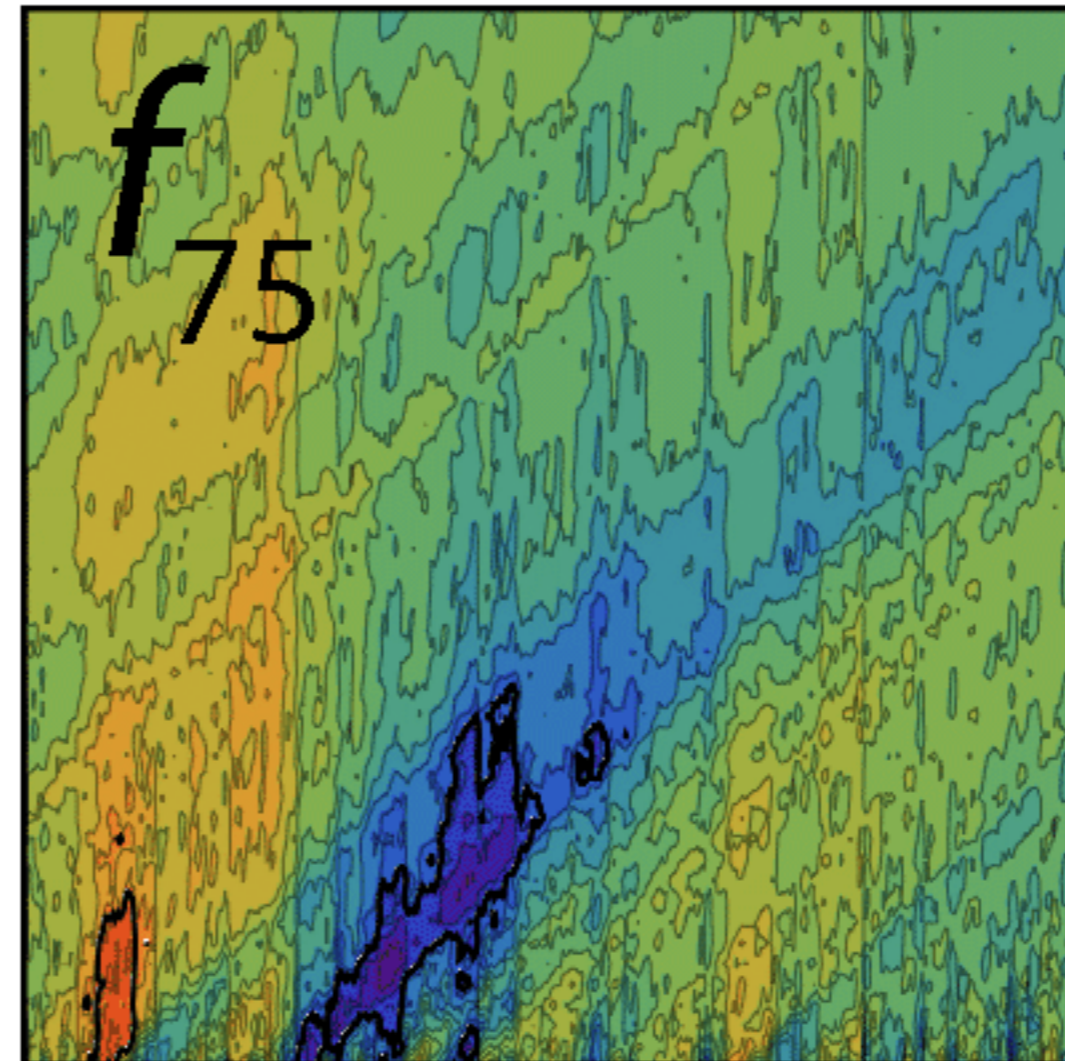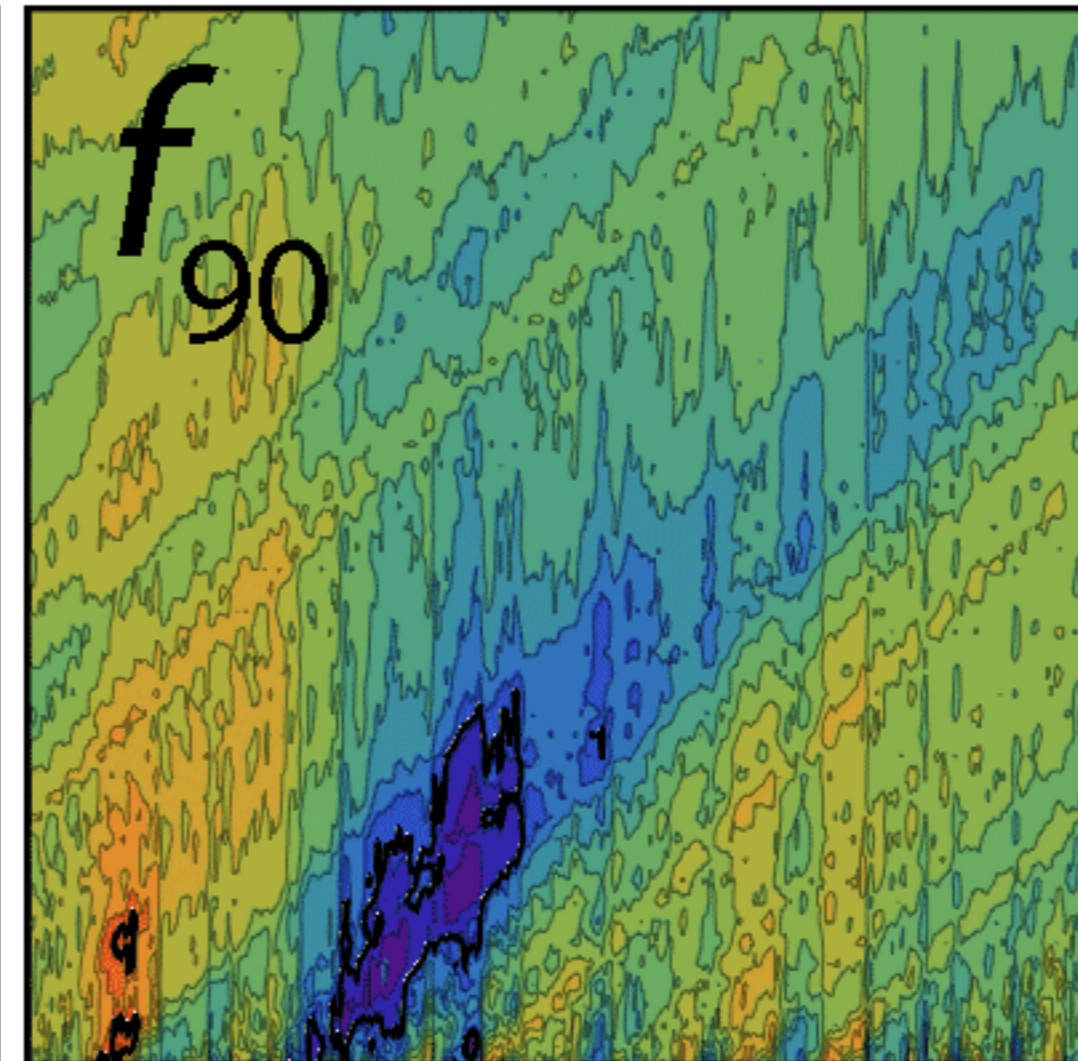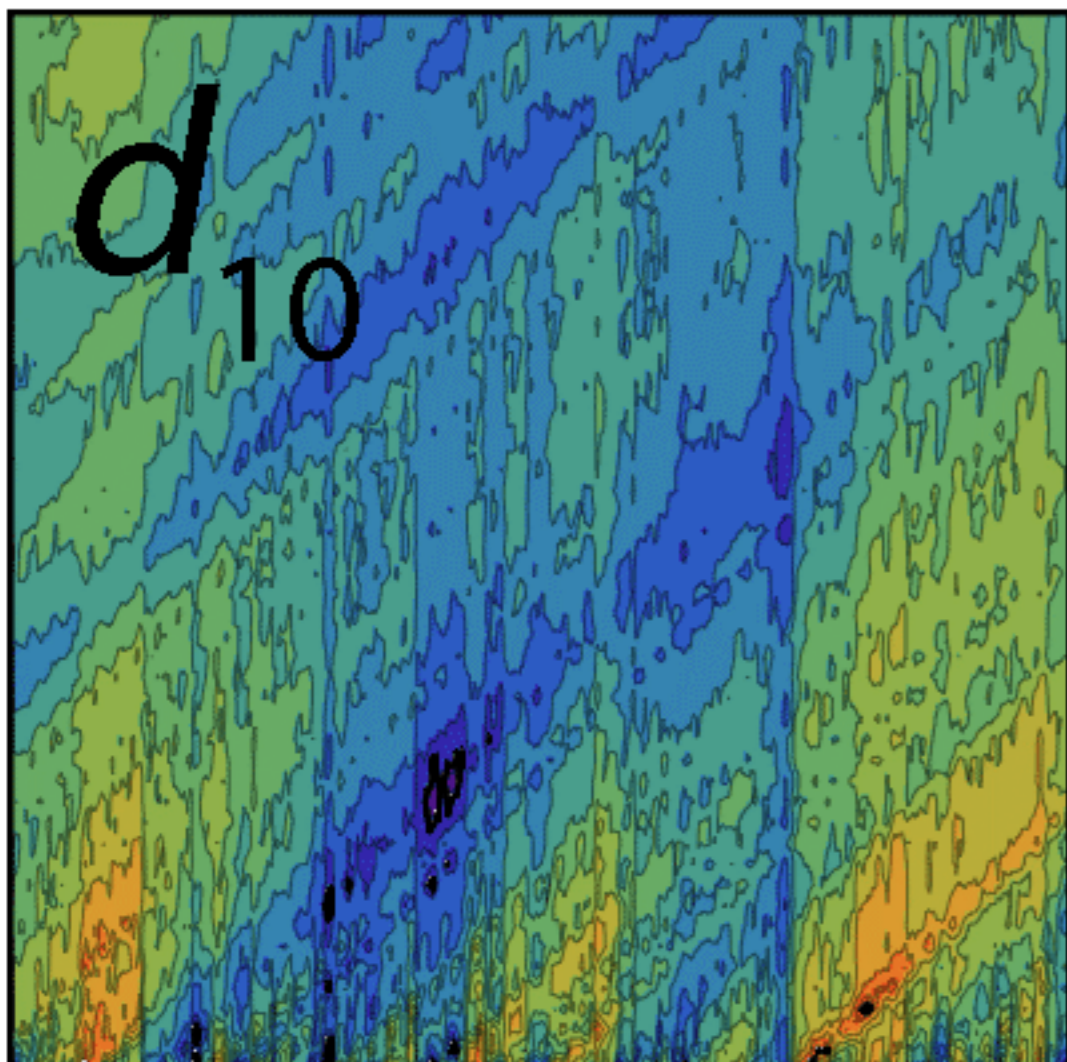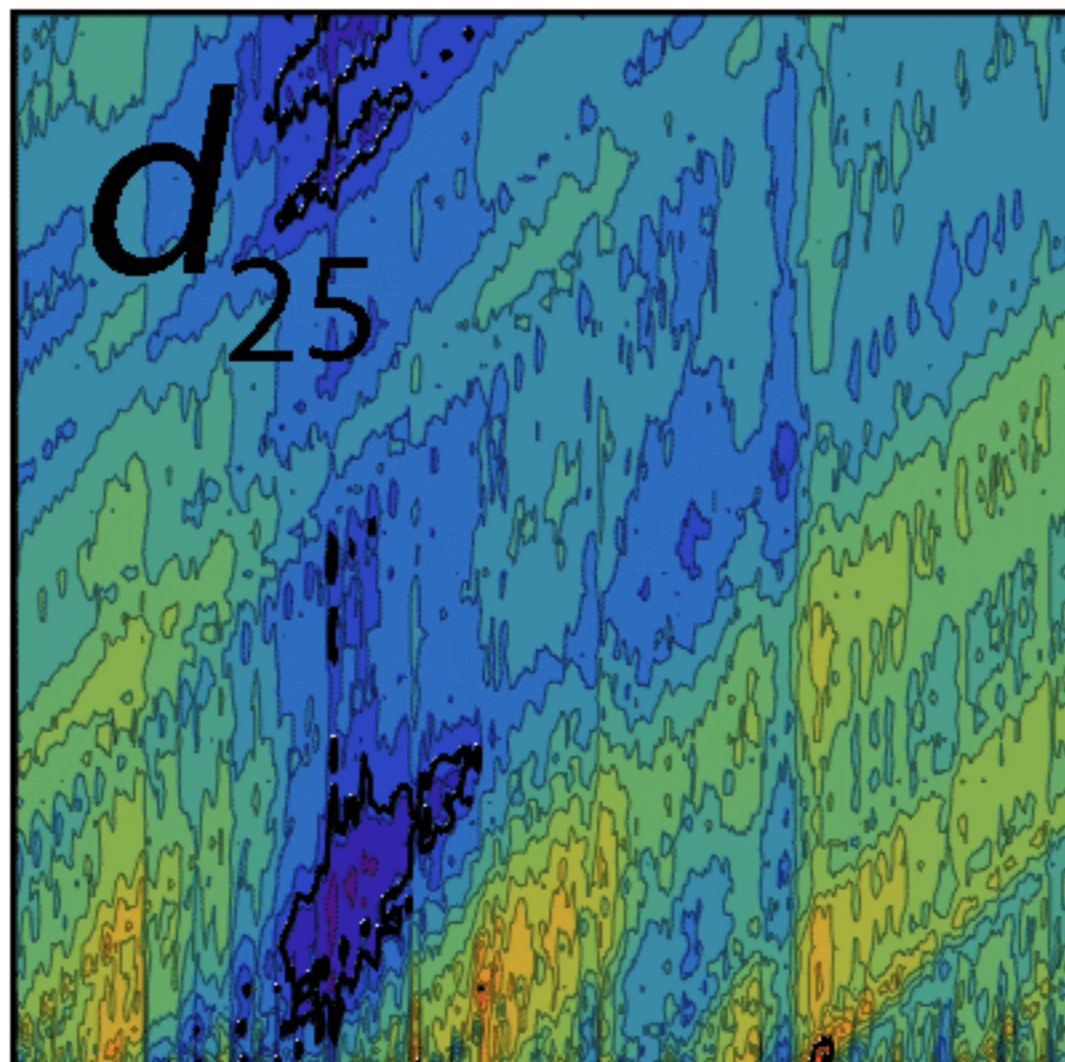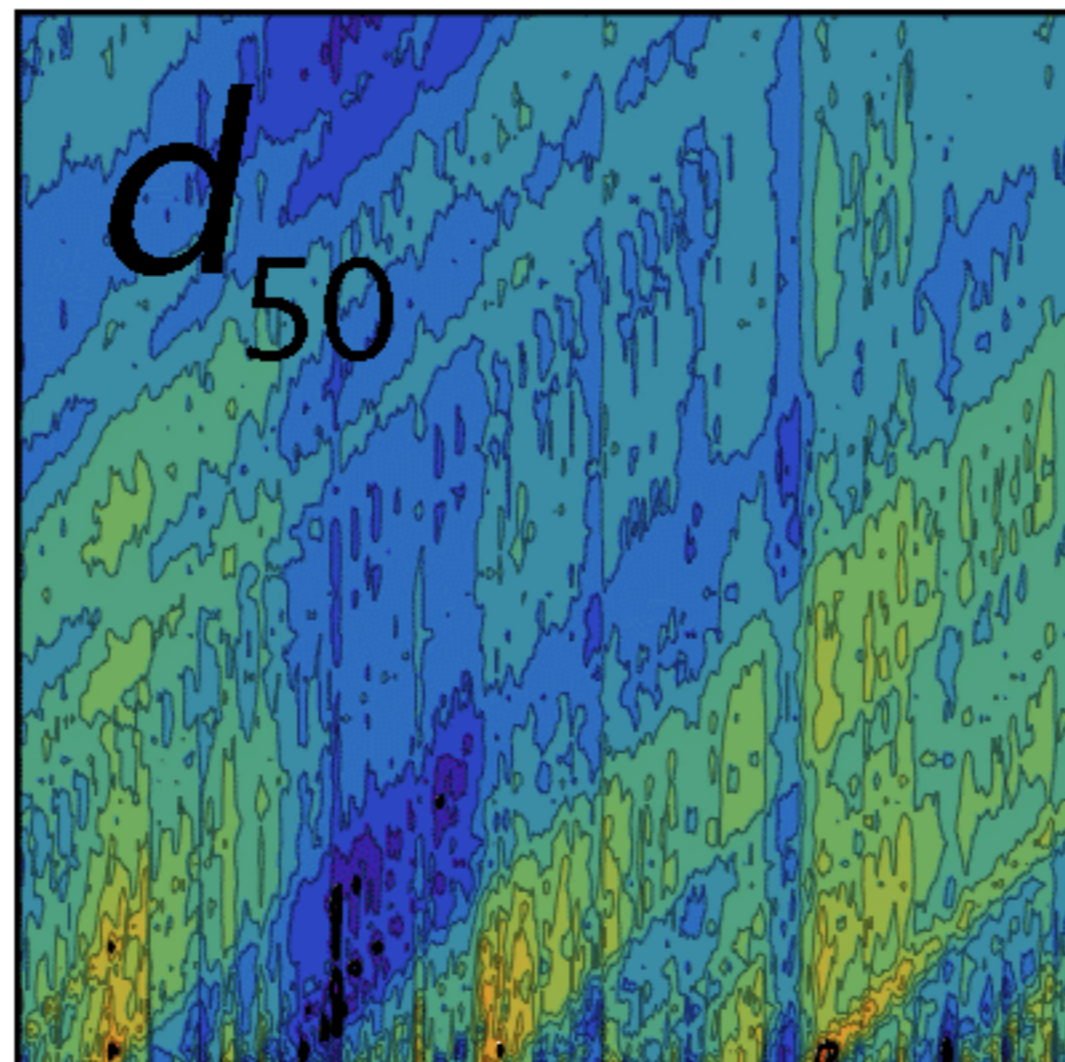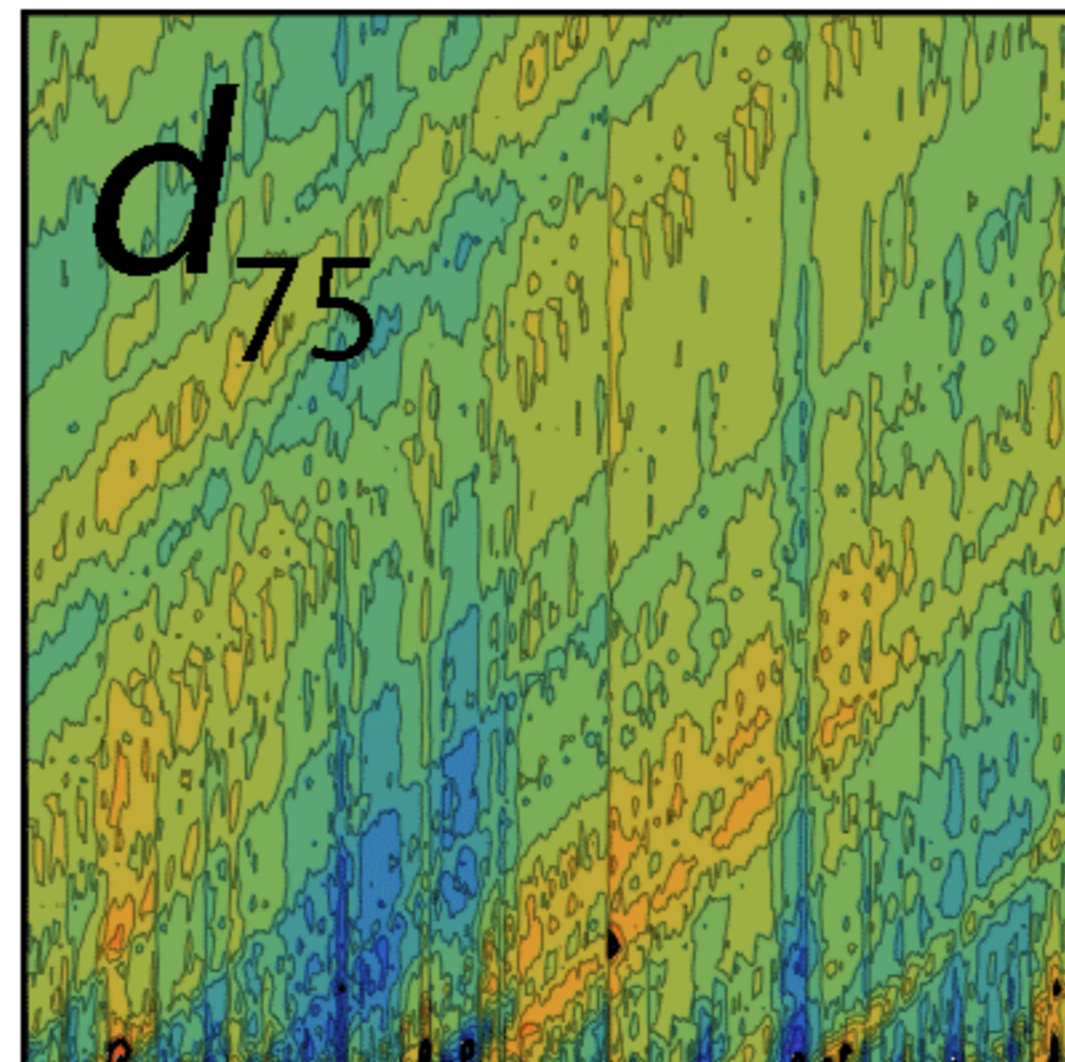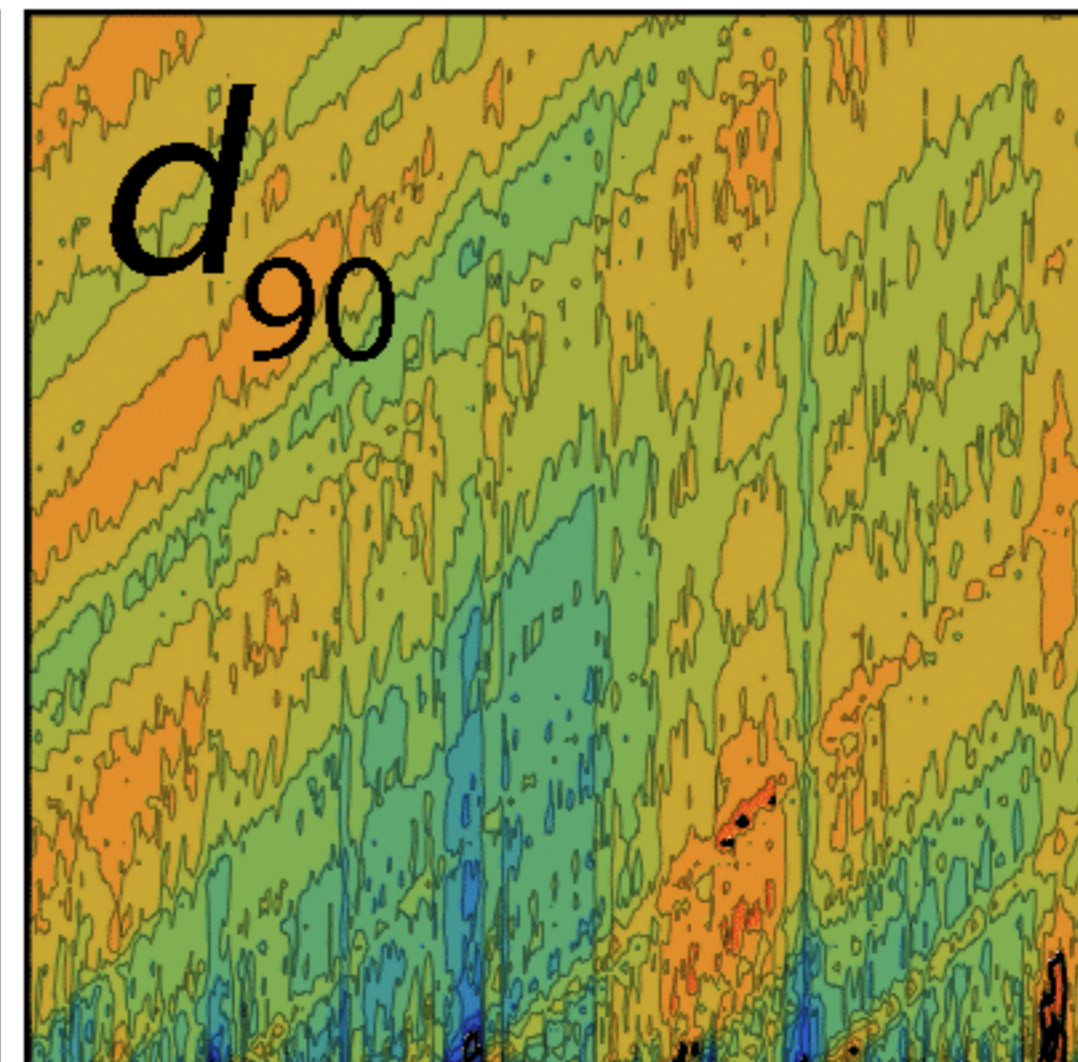

# *Fraxinus americana*

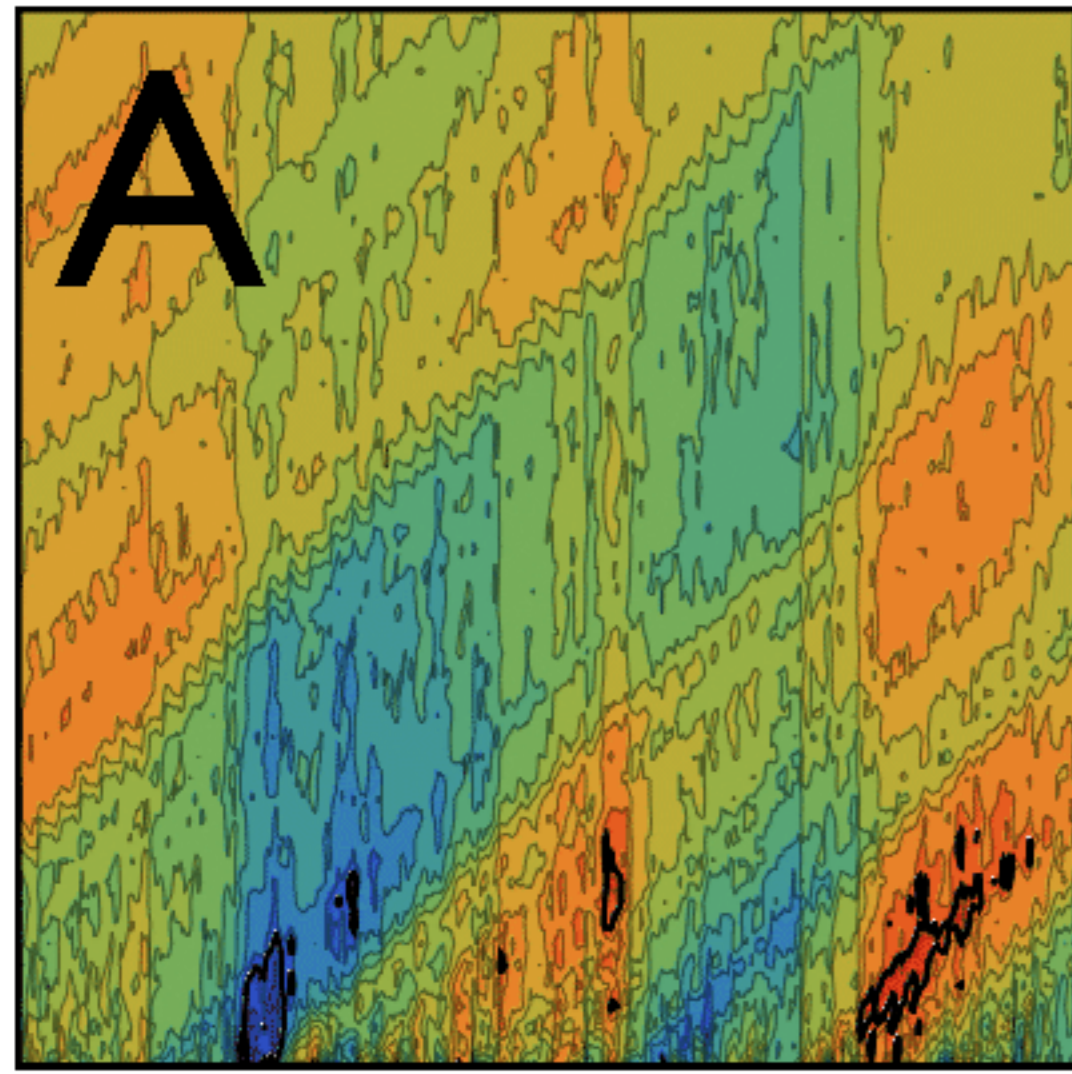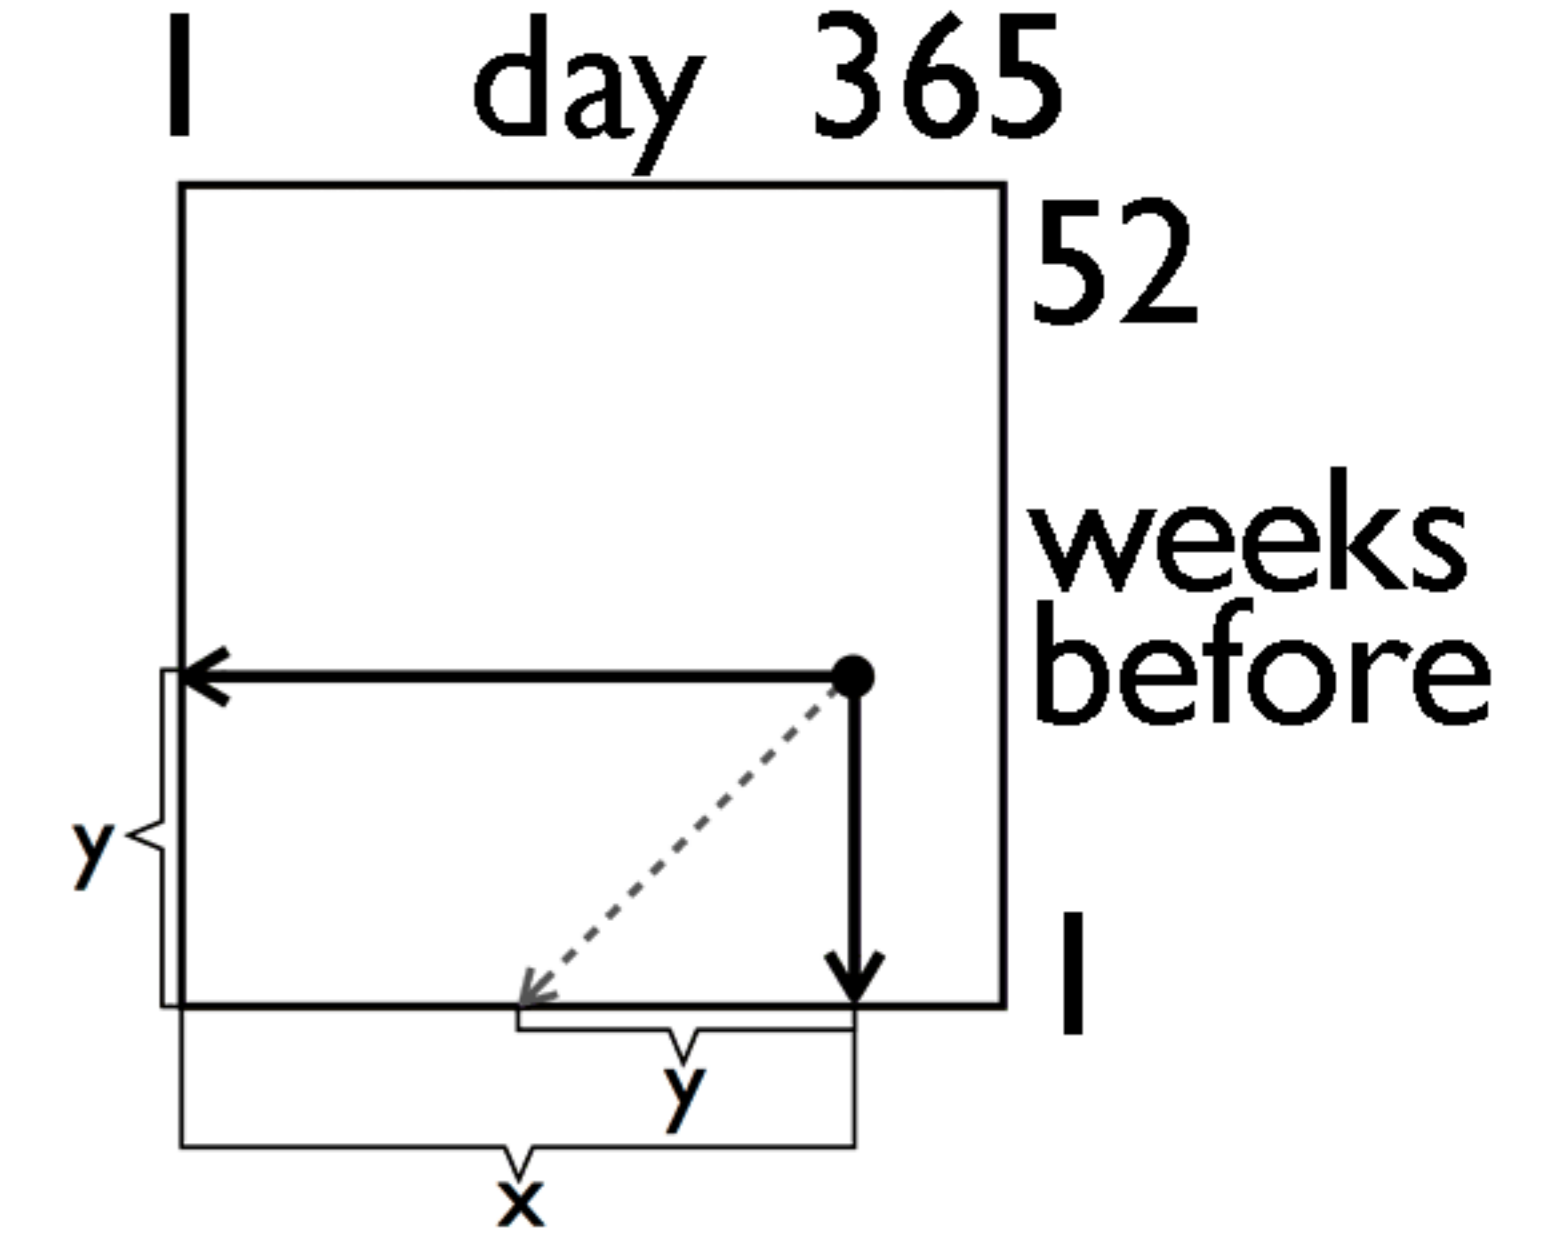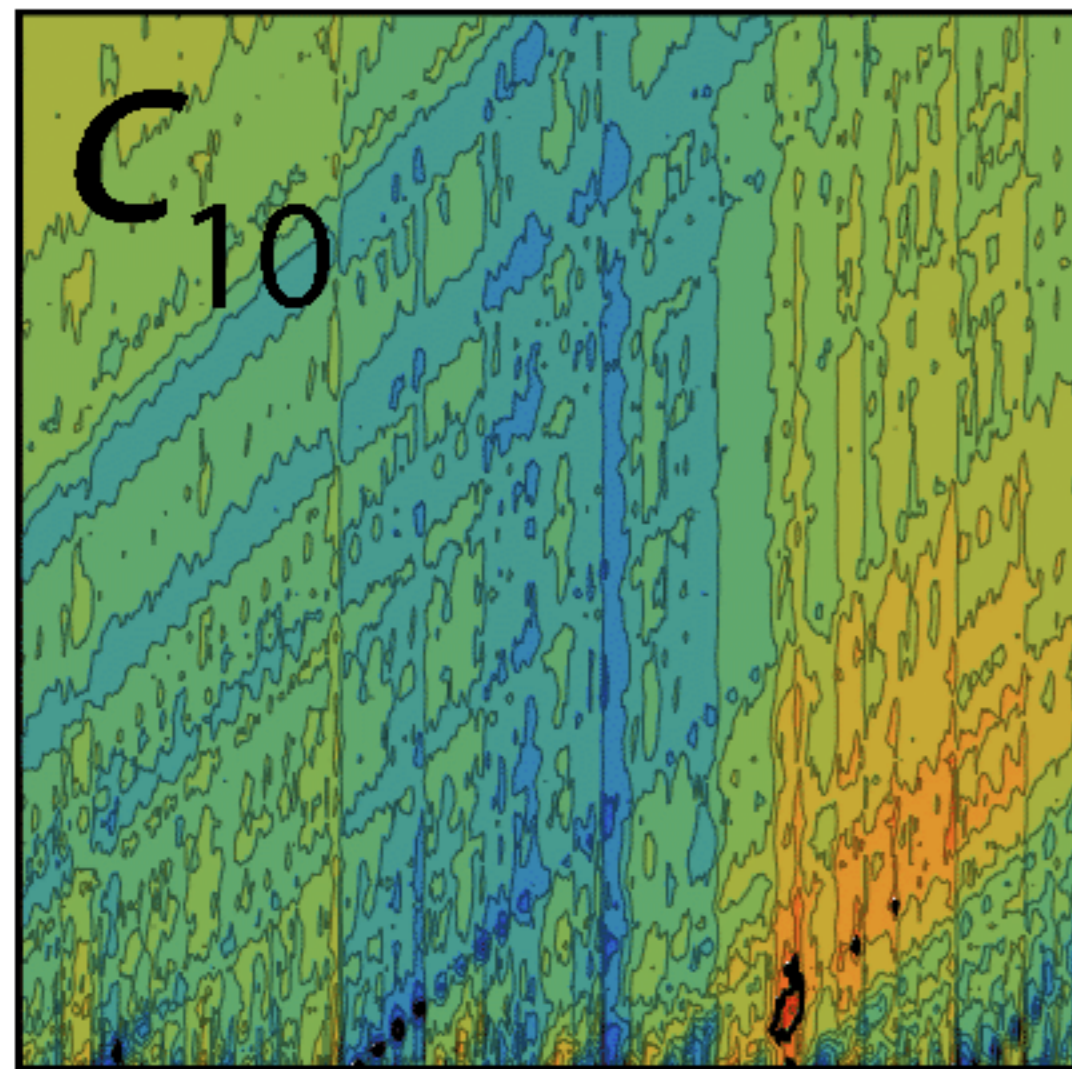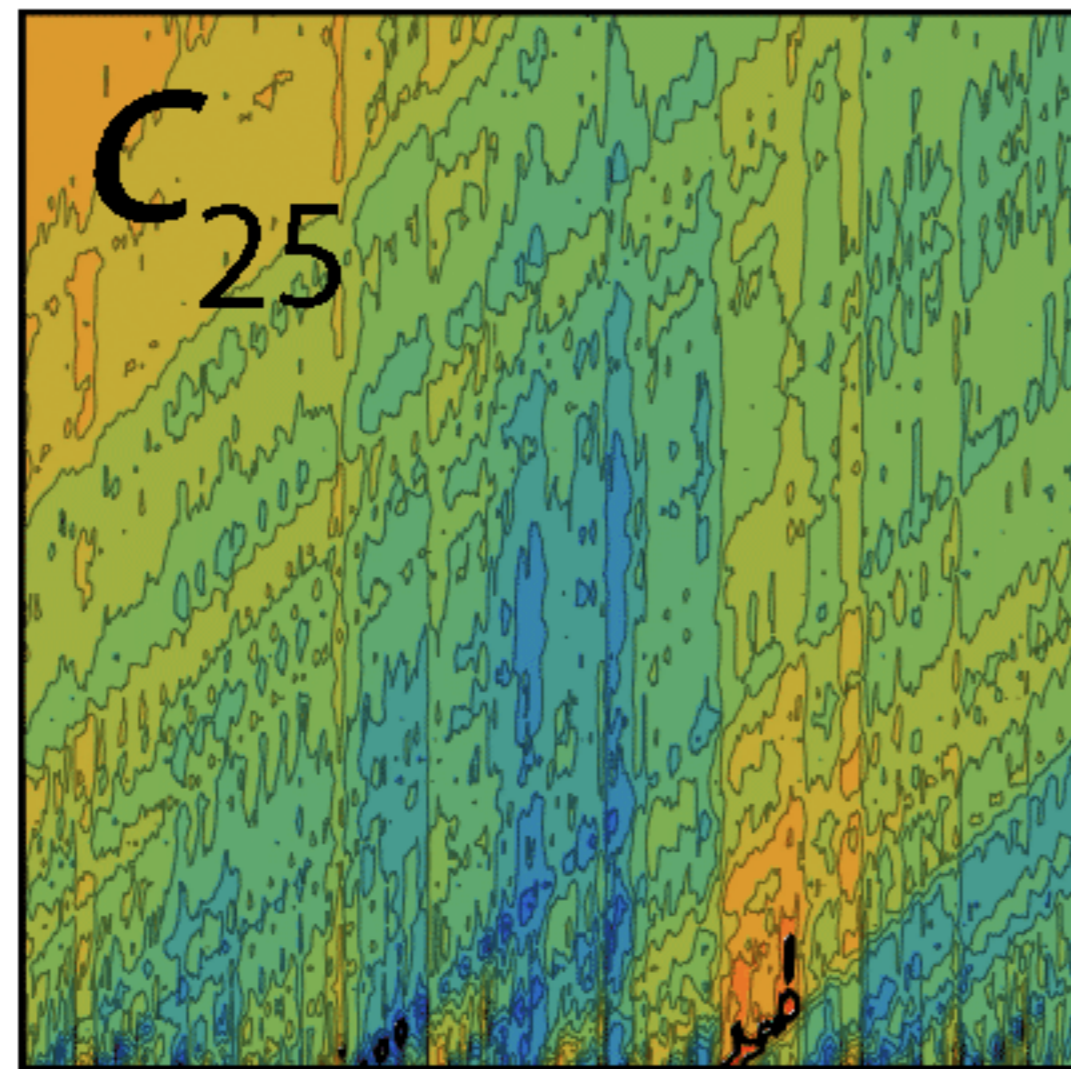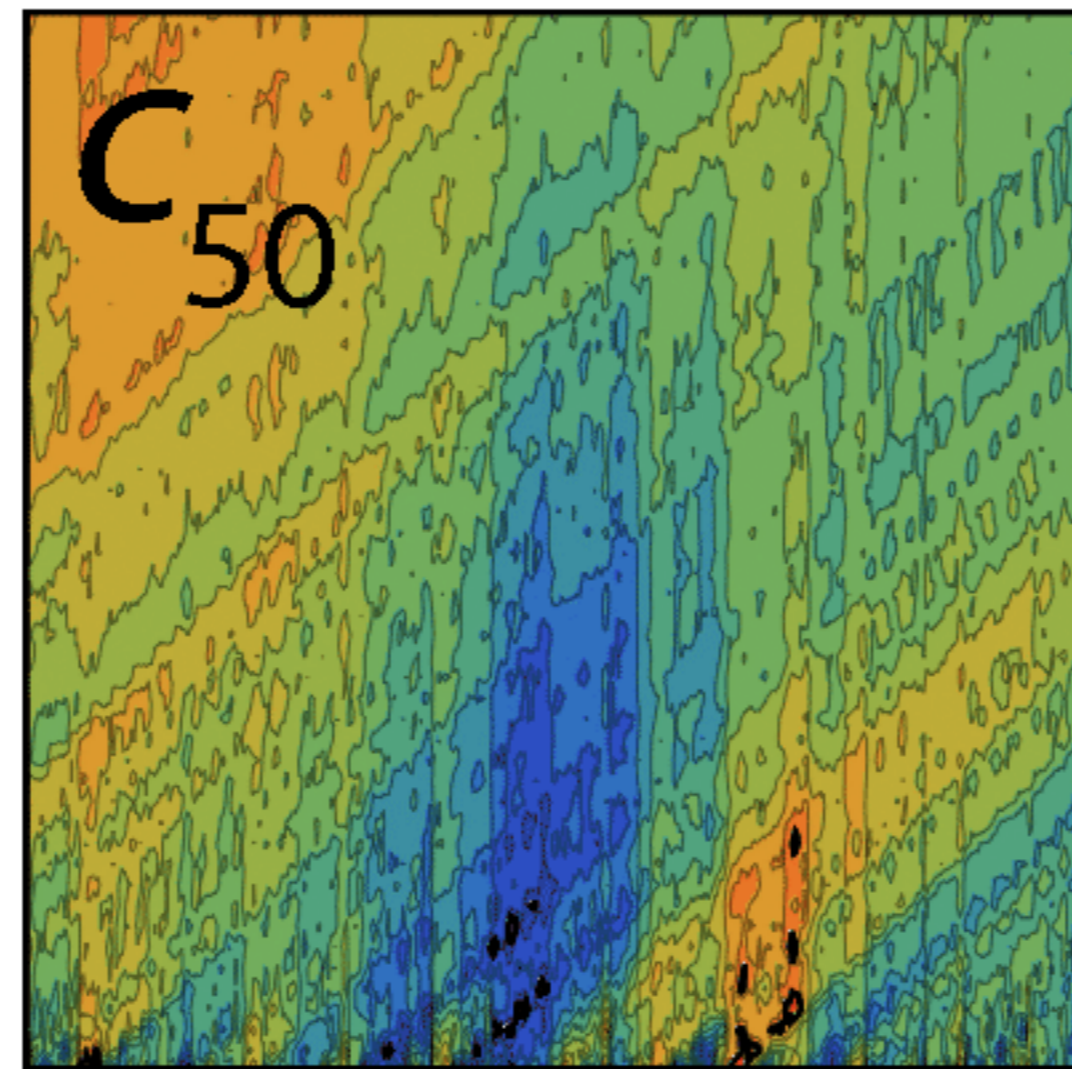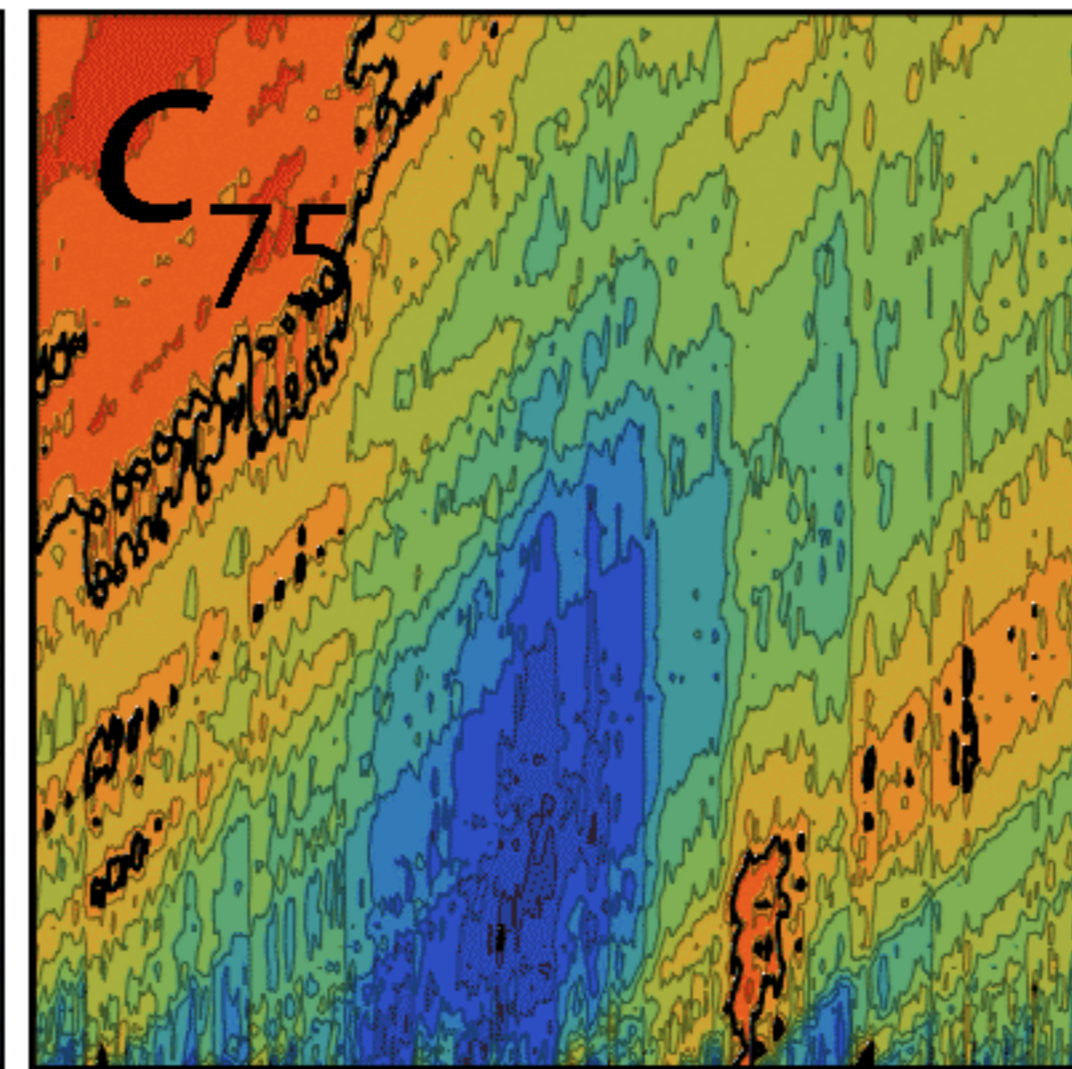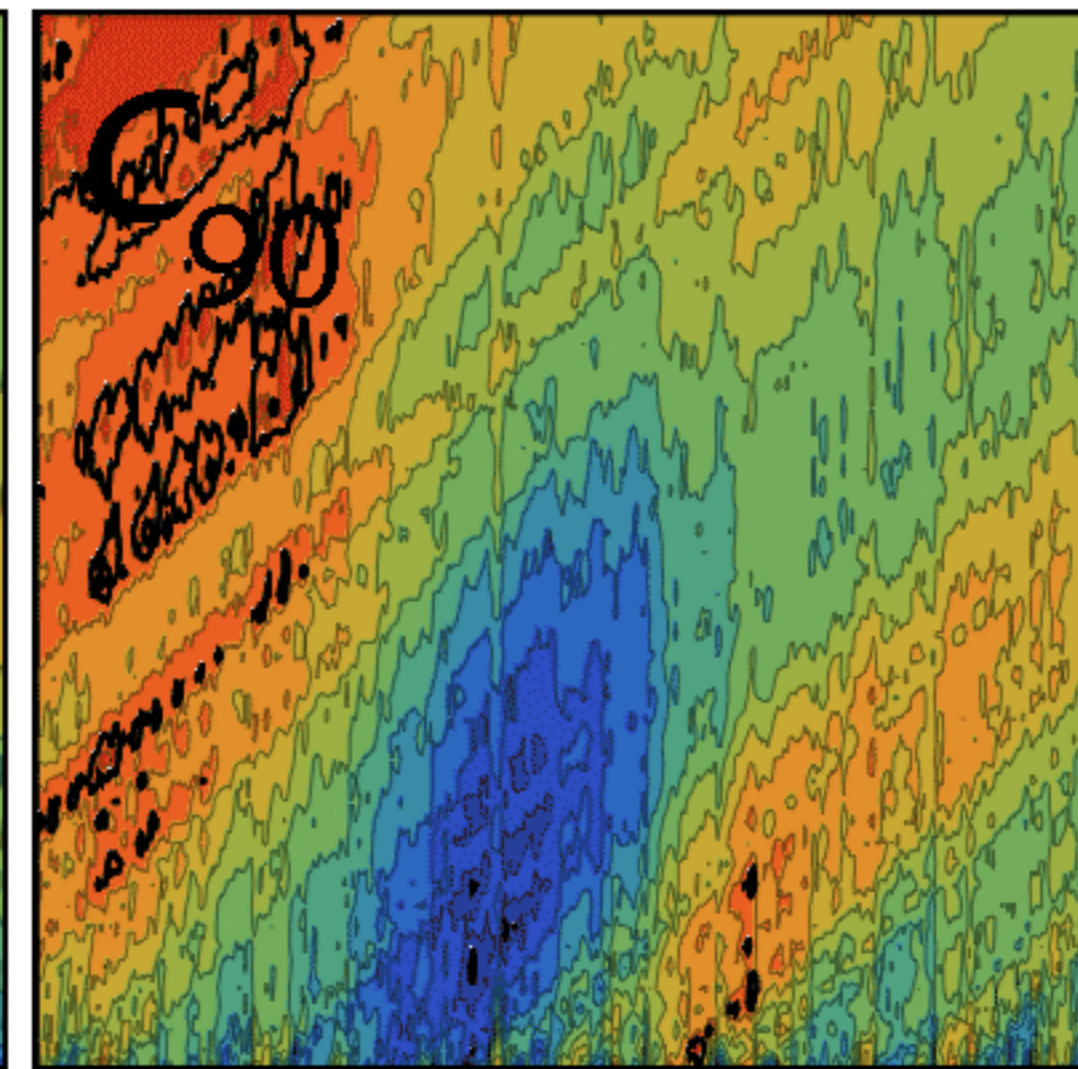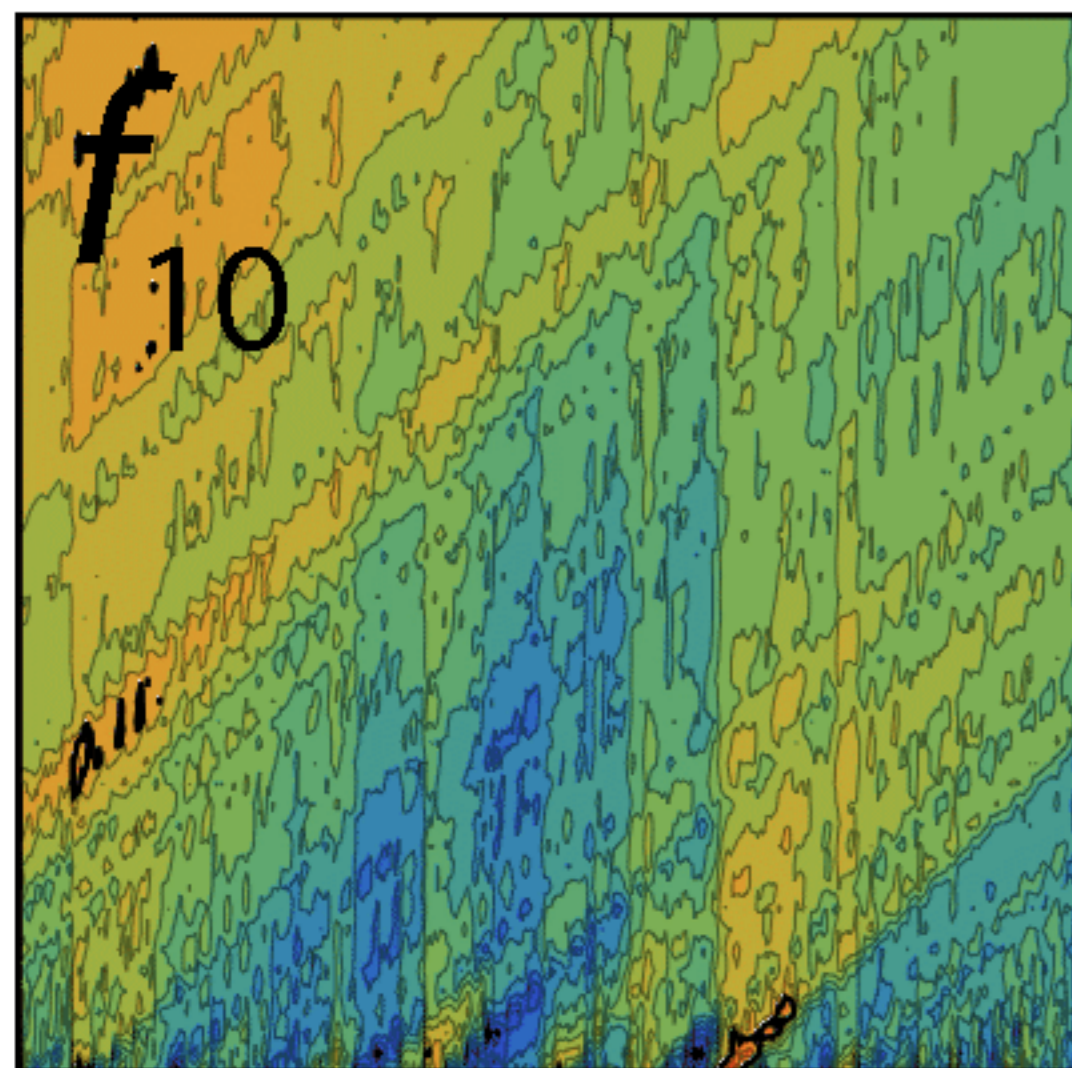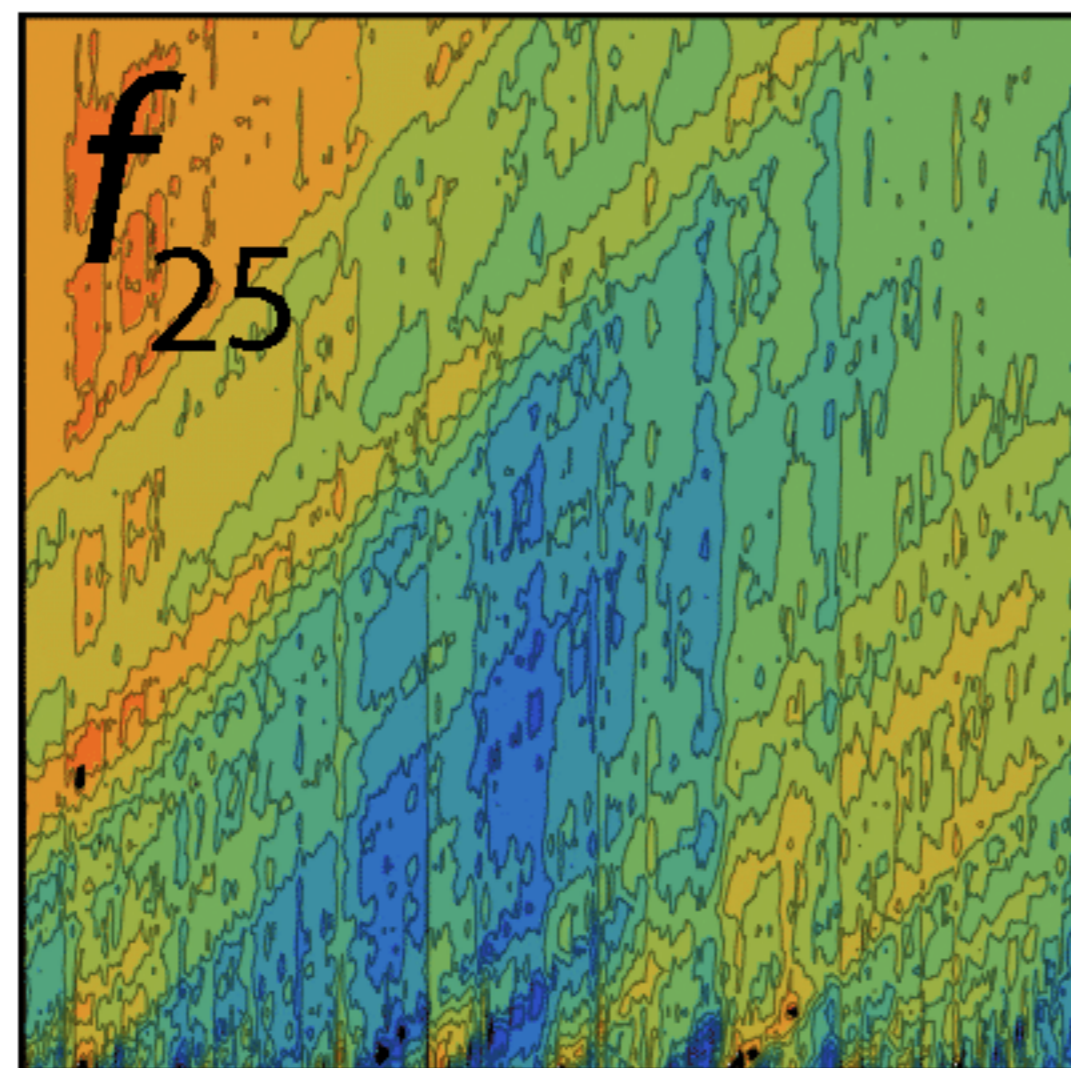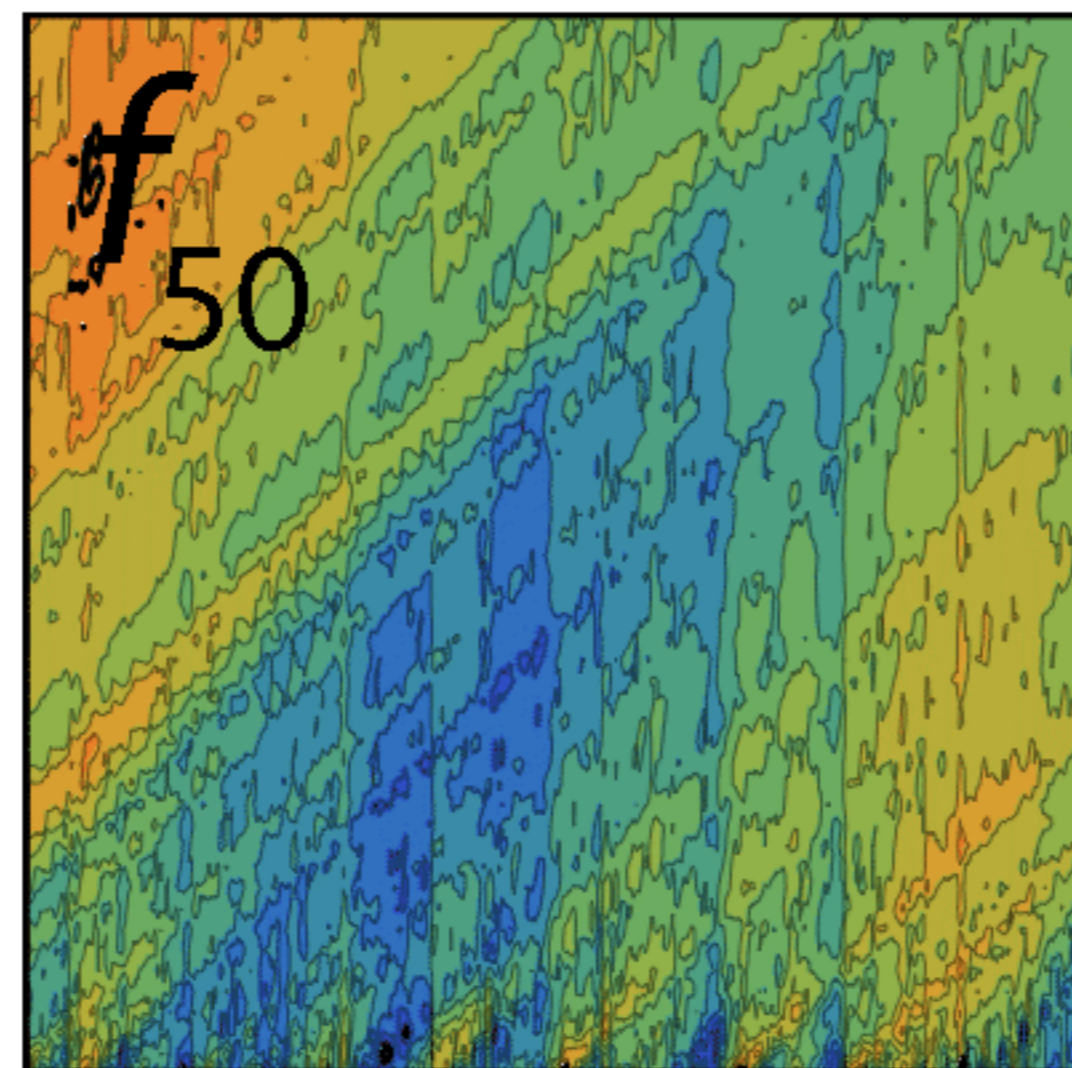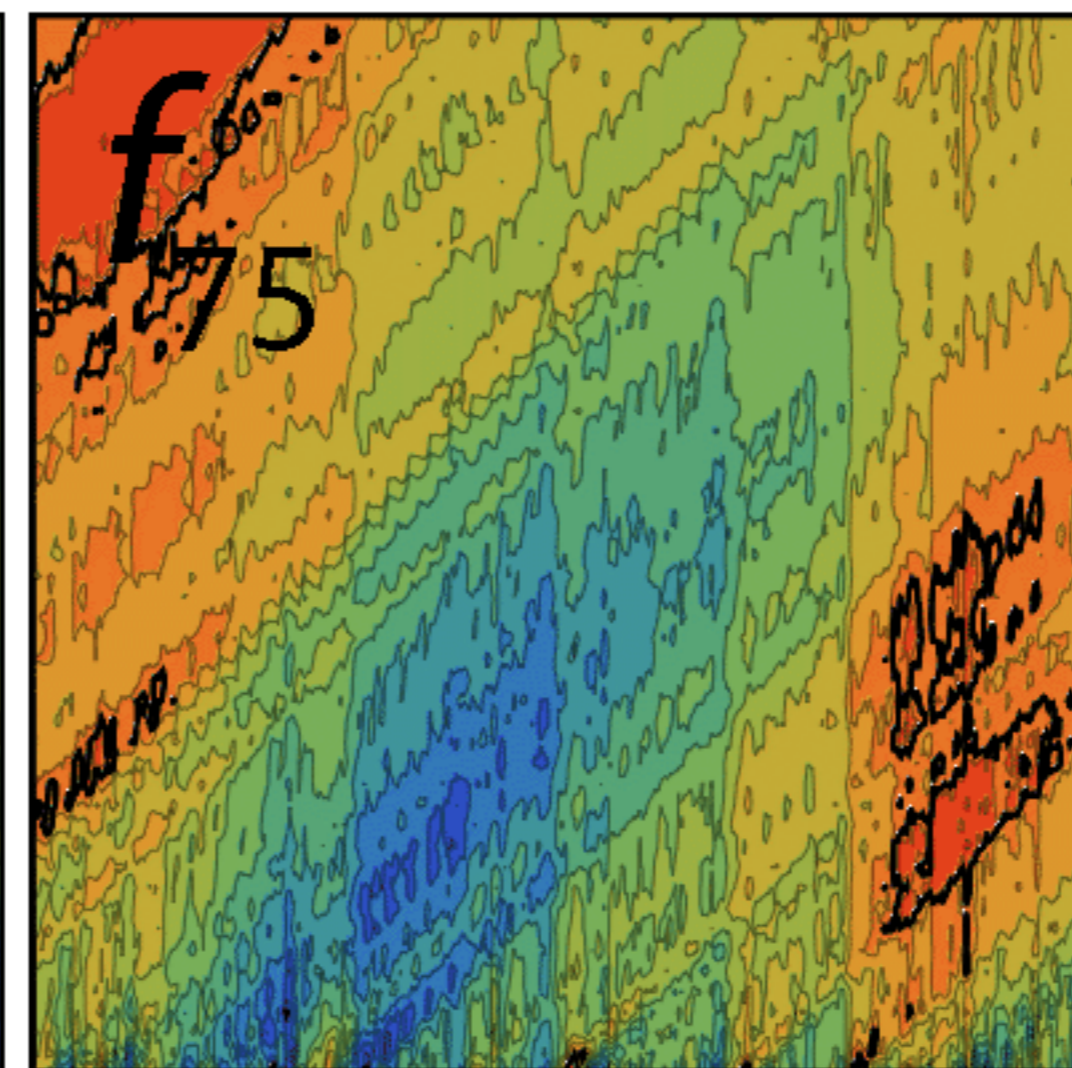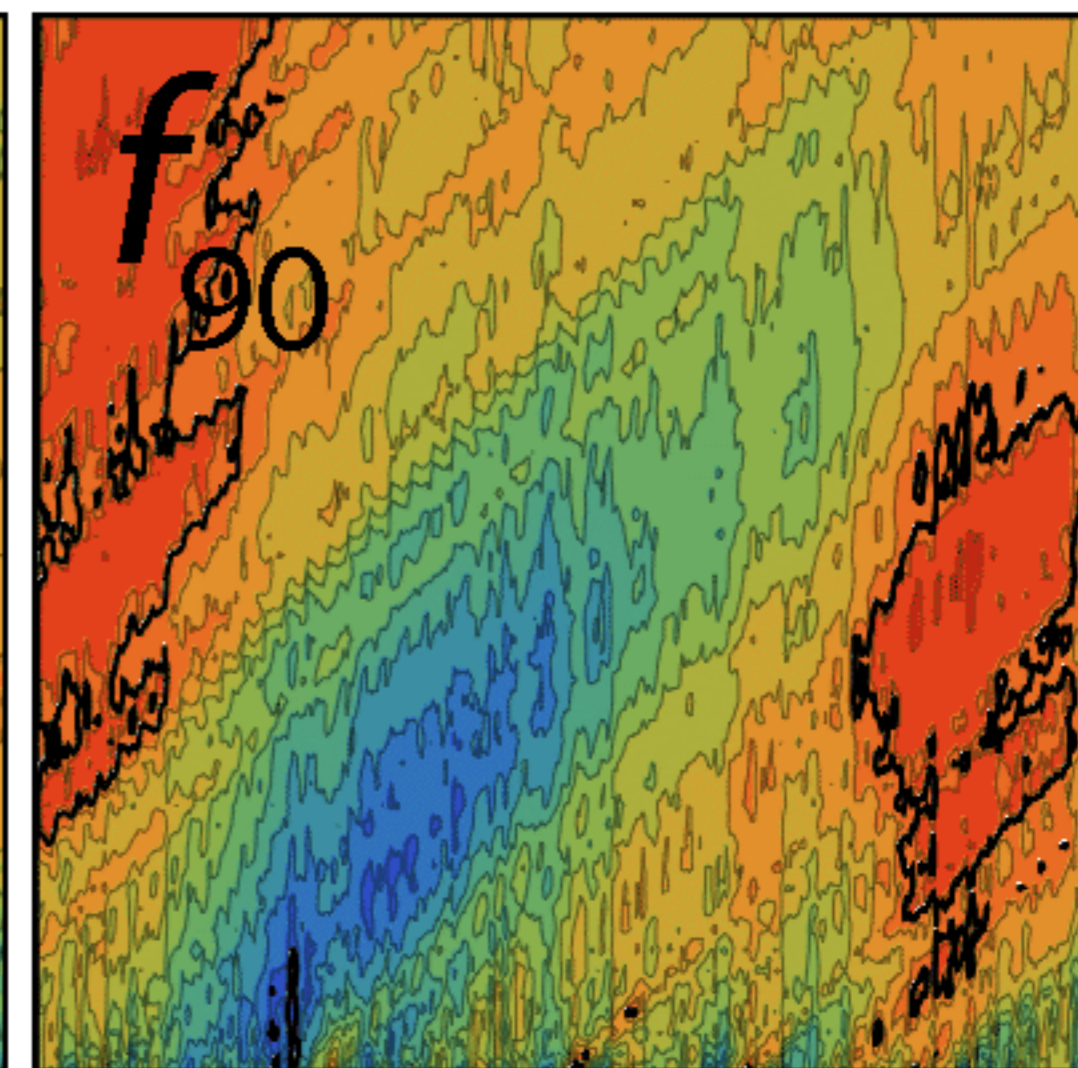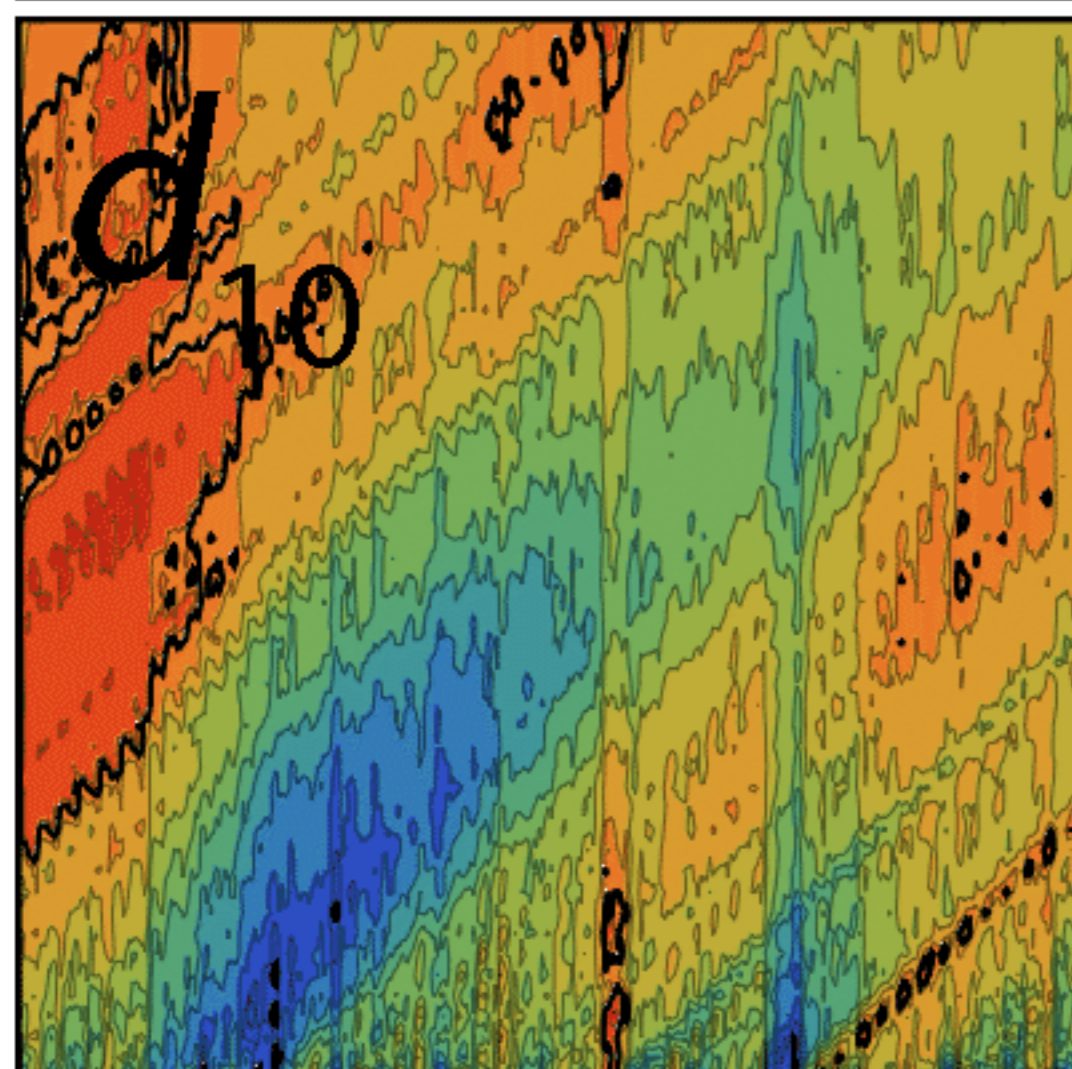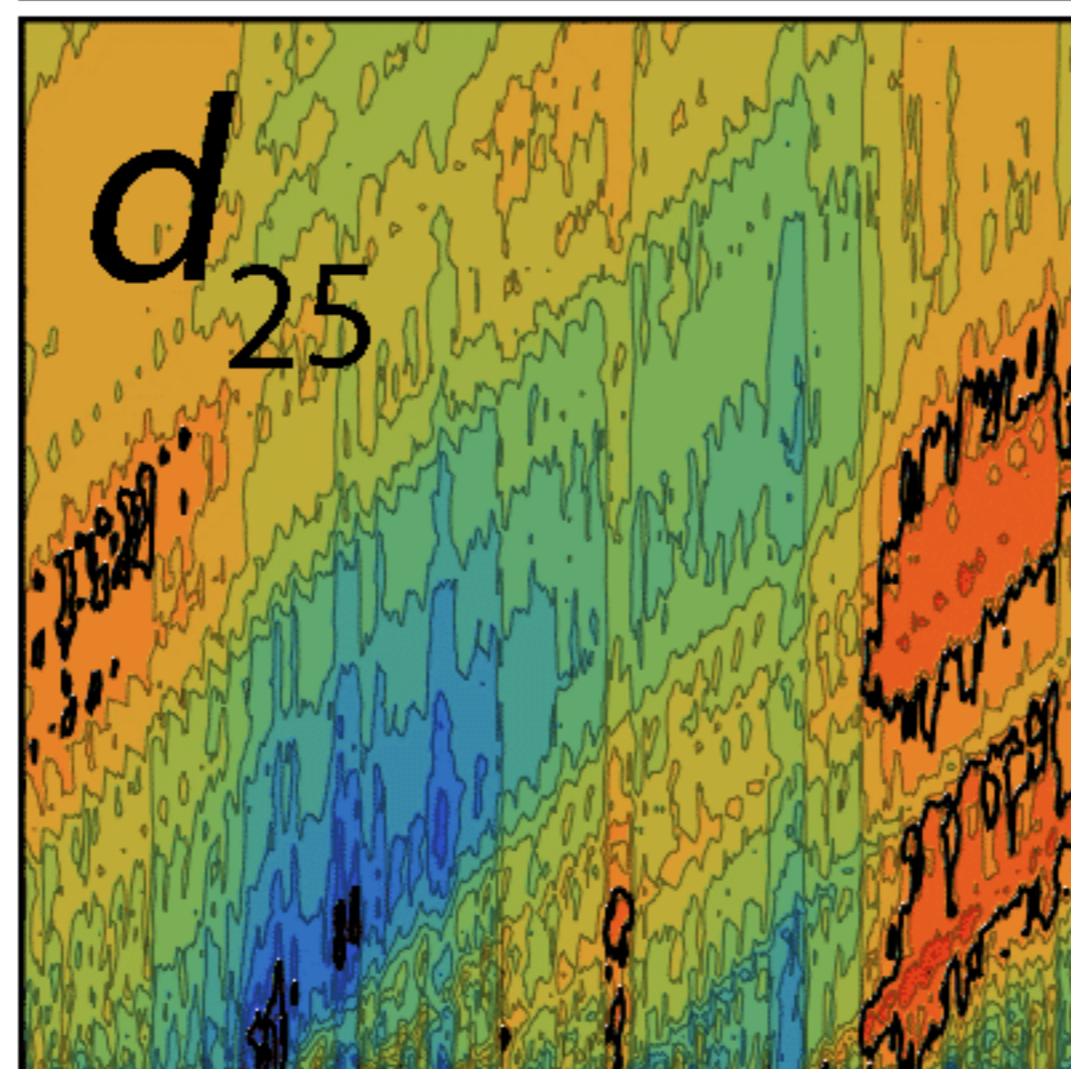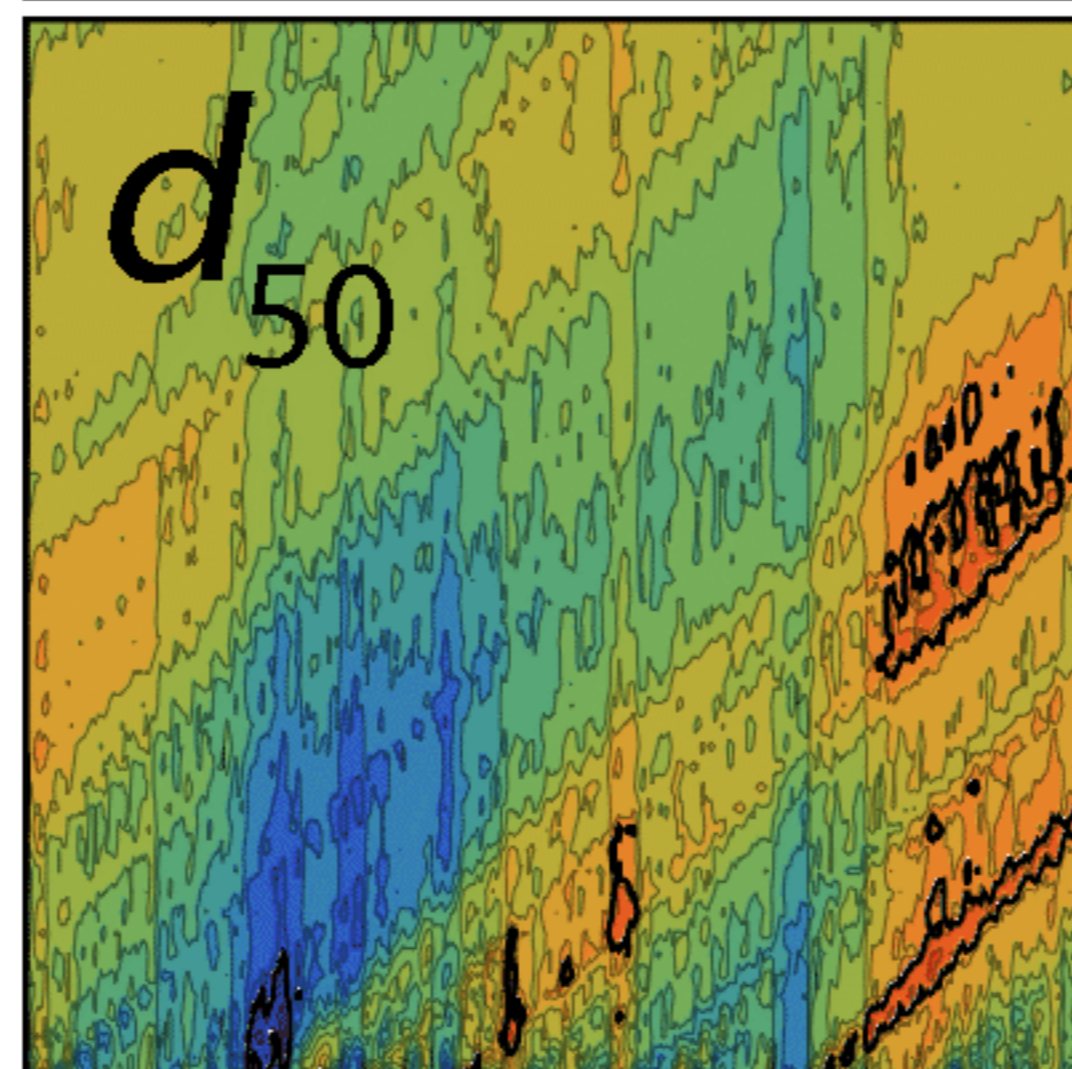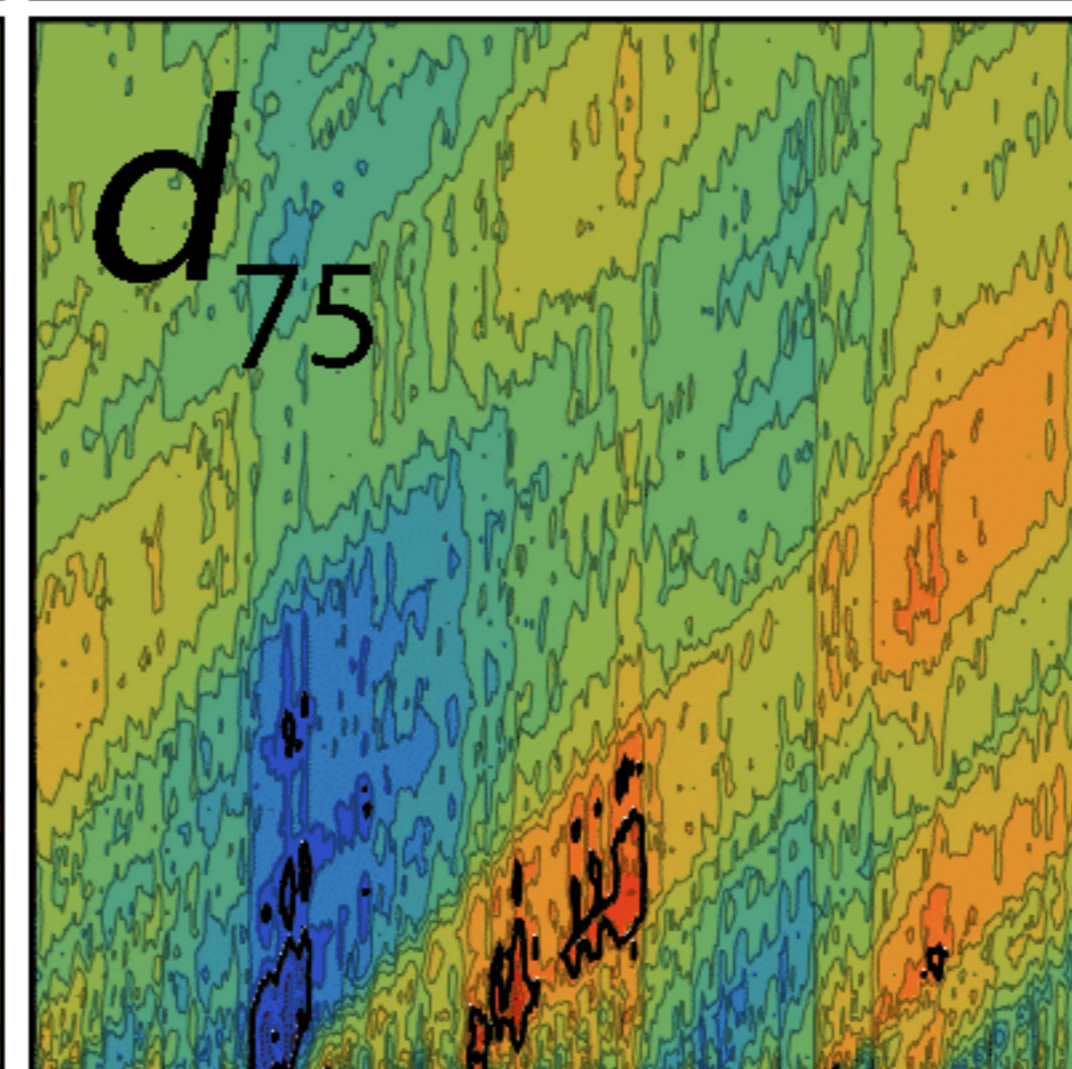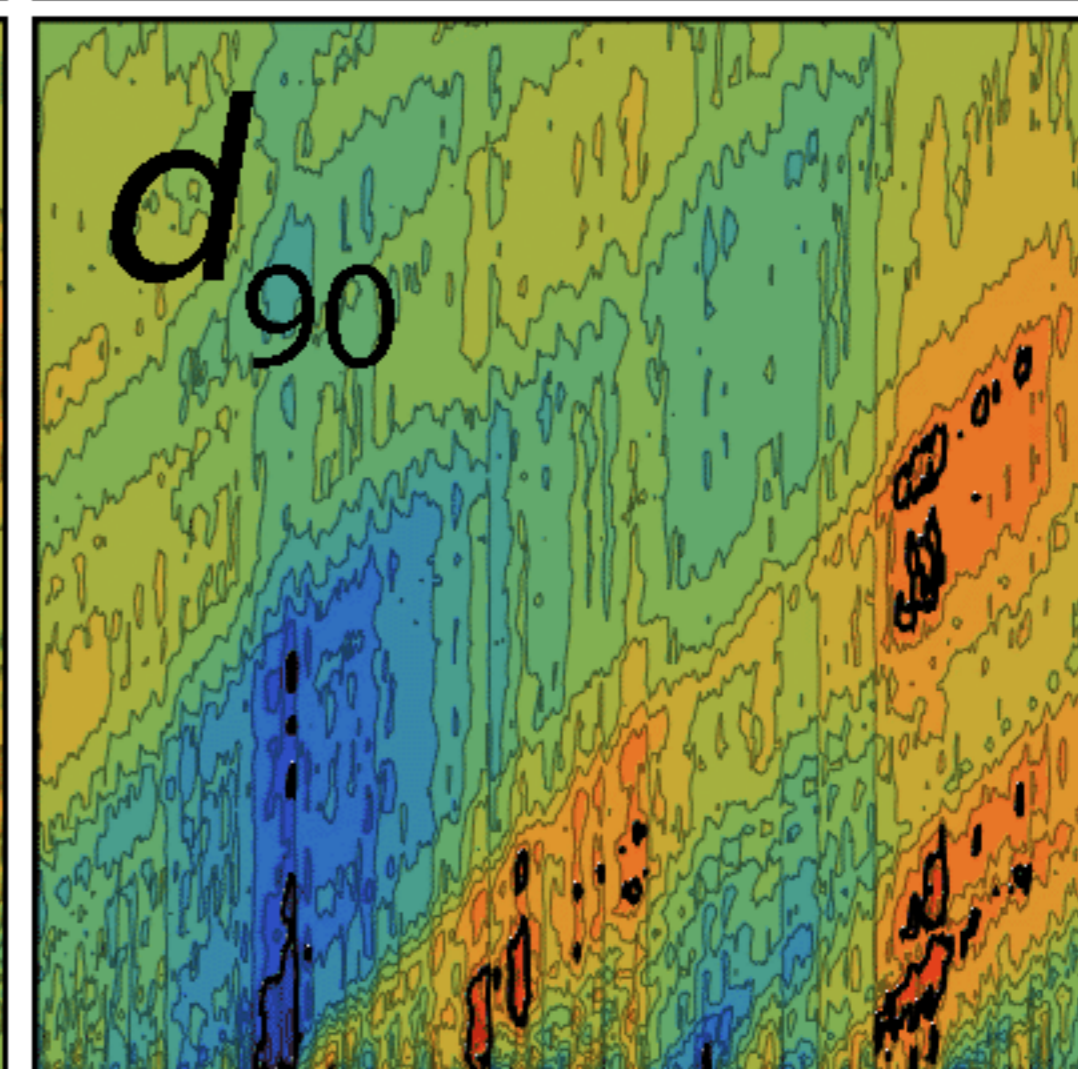

# *Nyssa sylvatica*

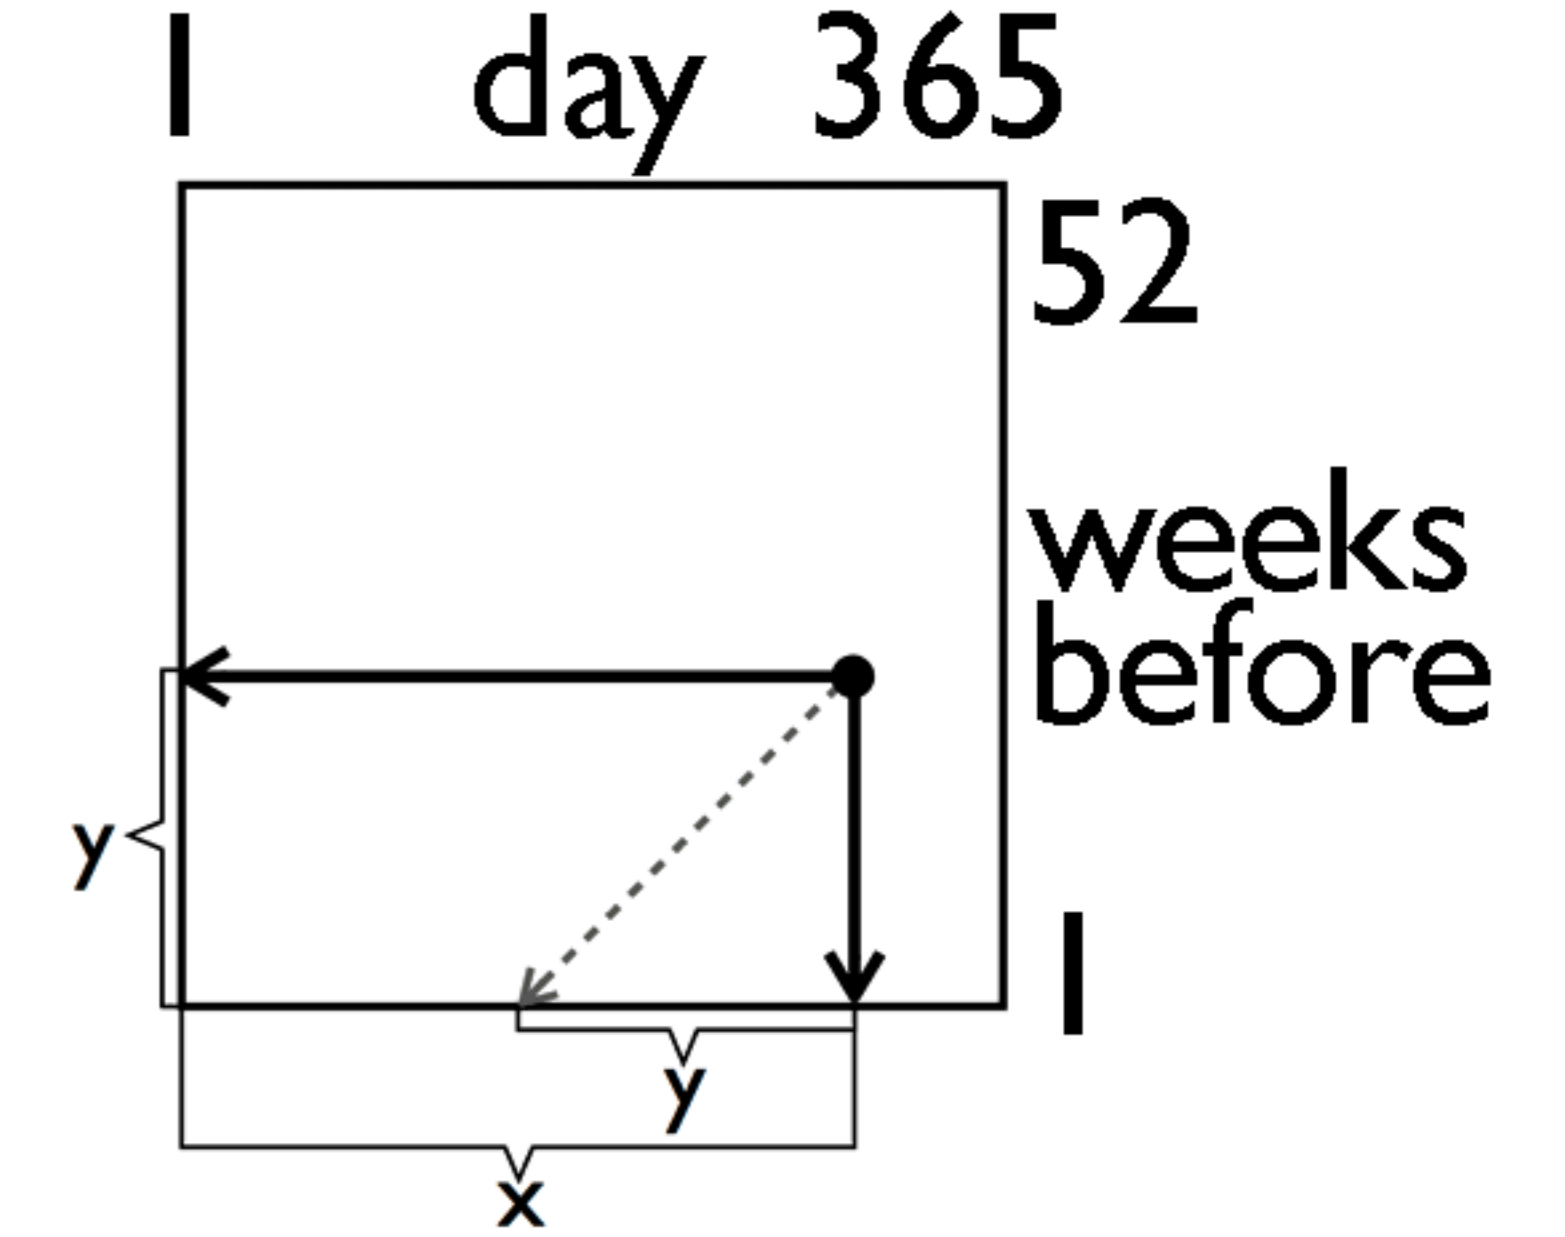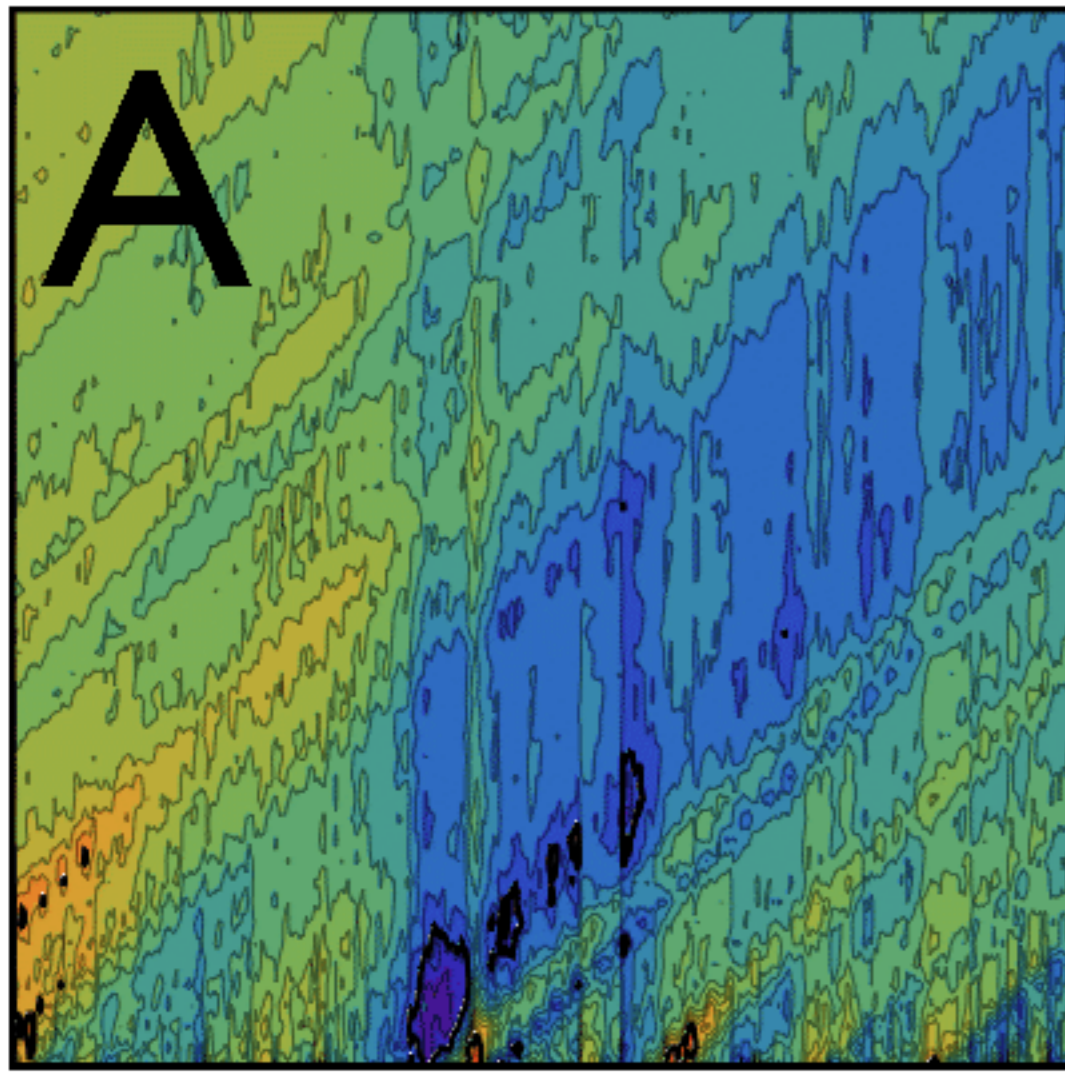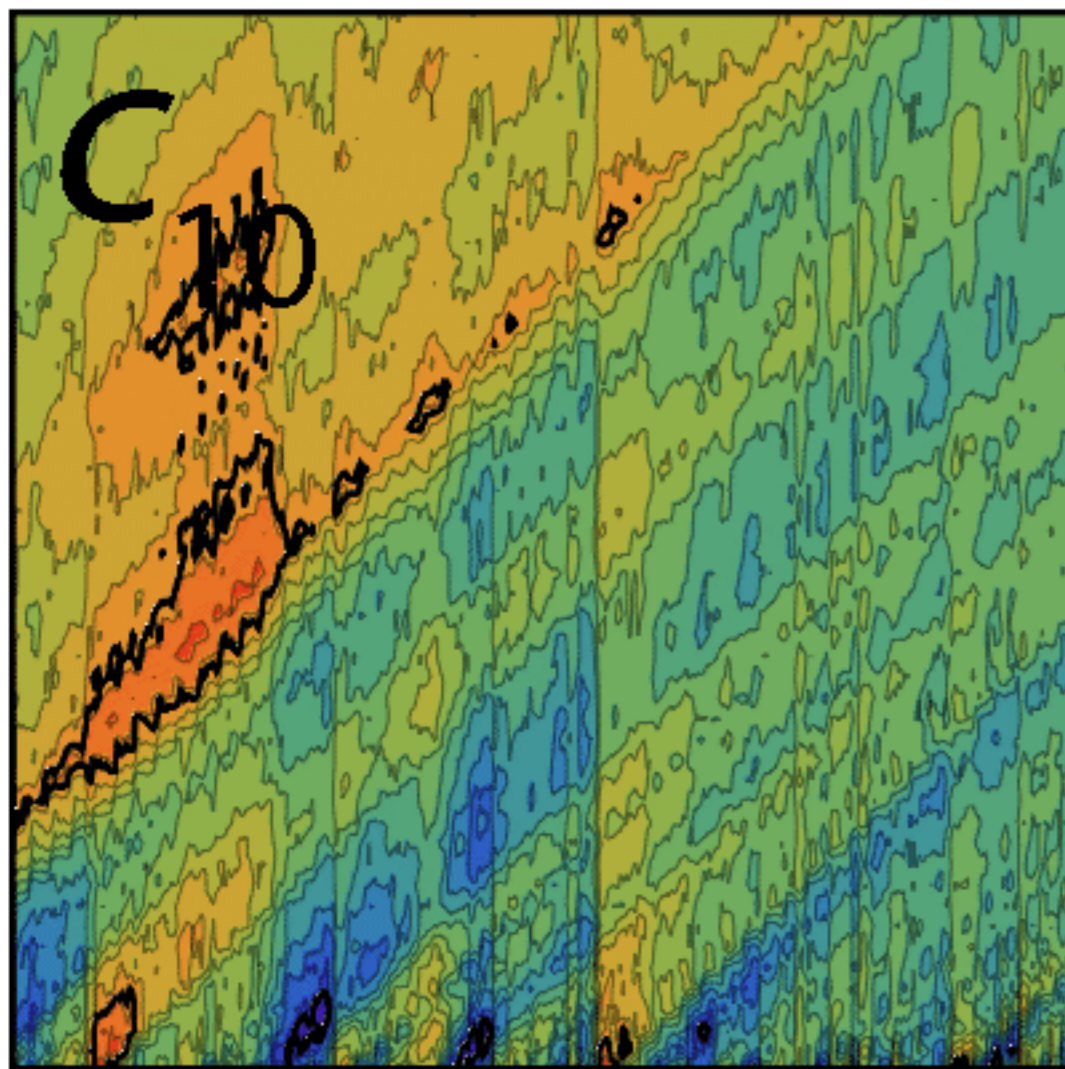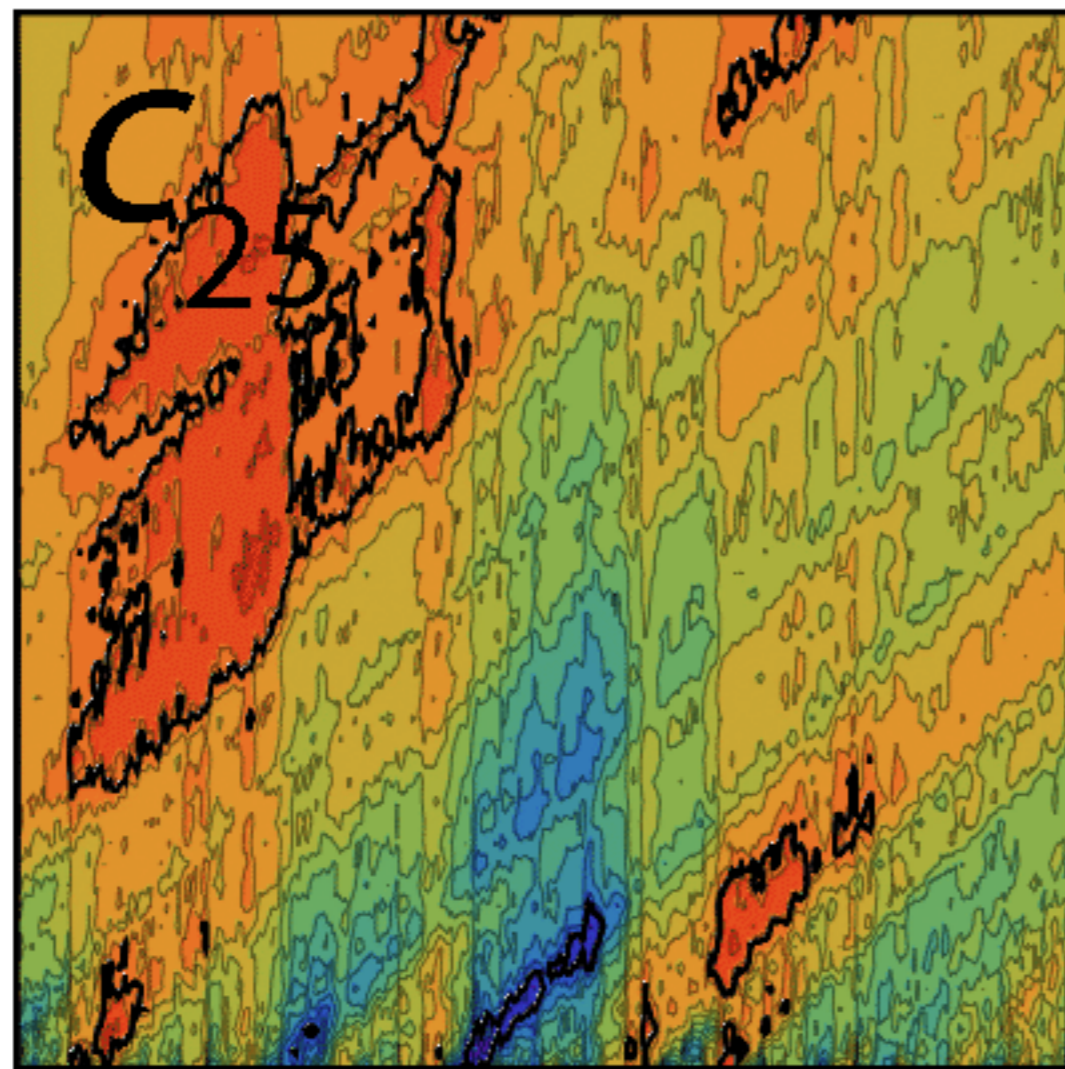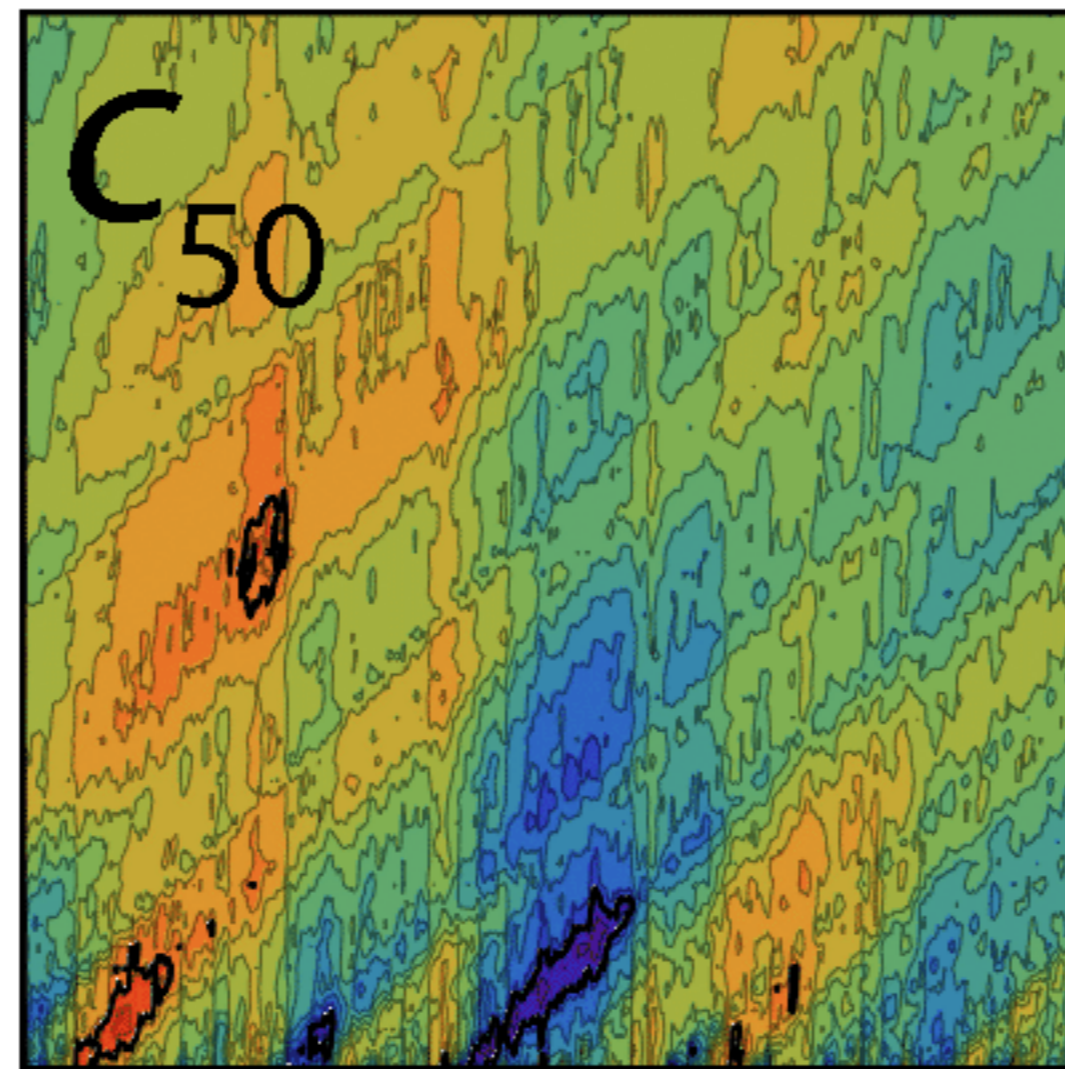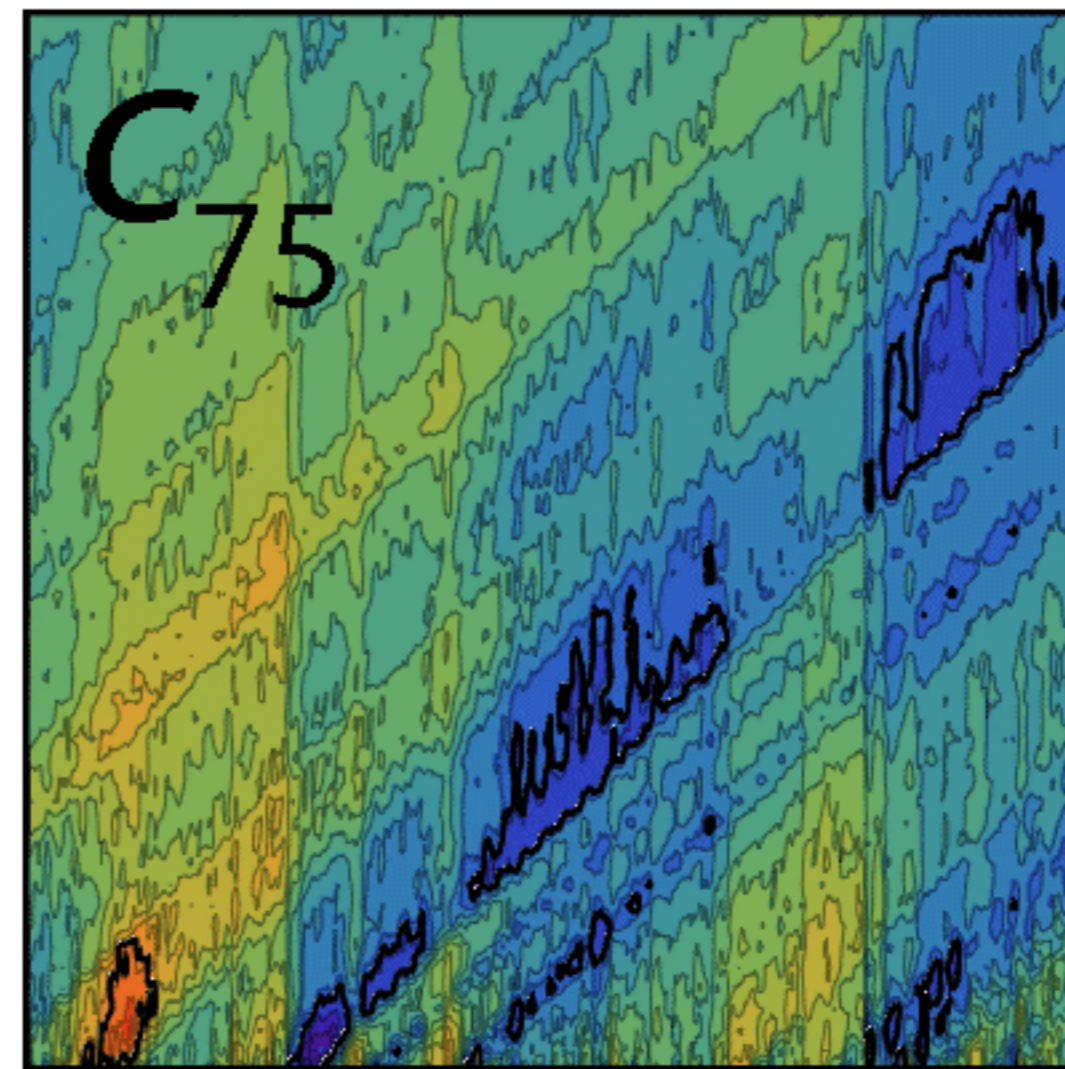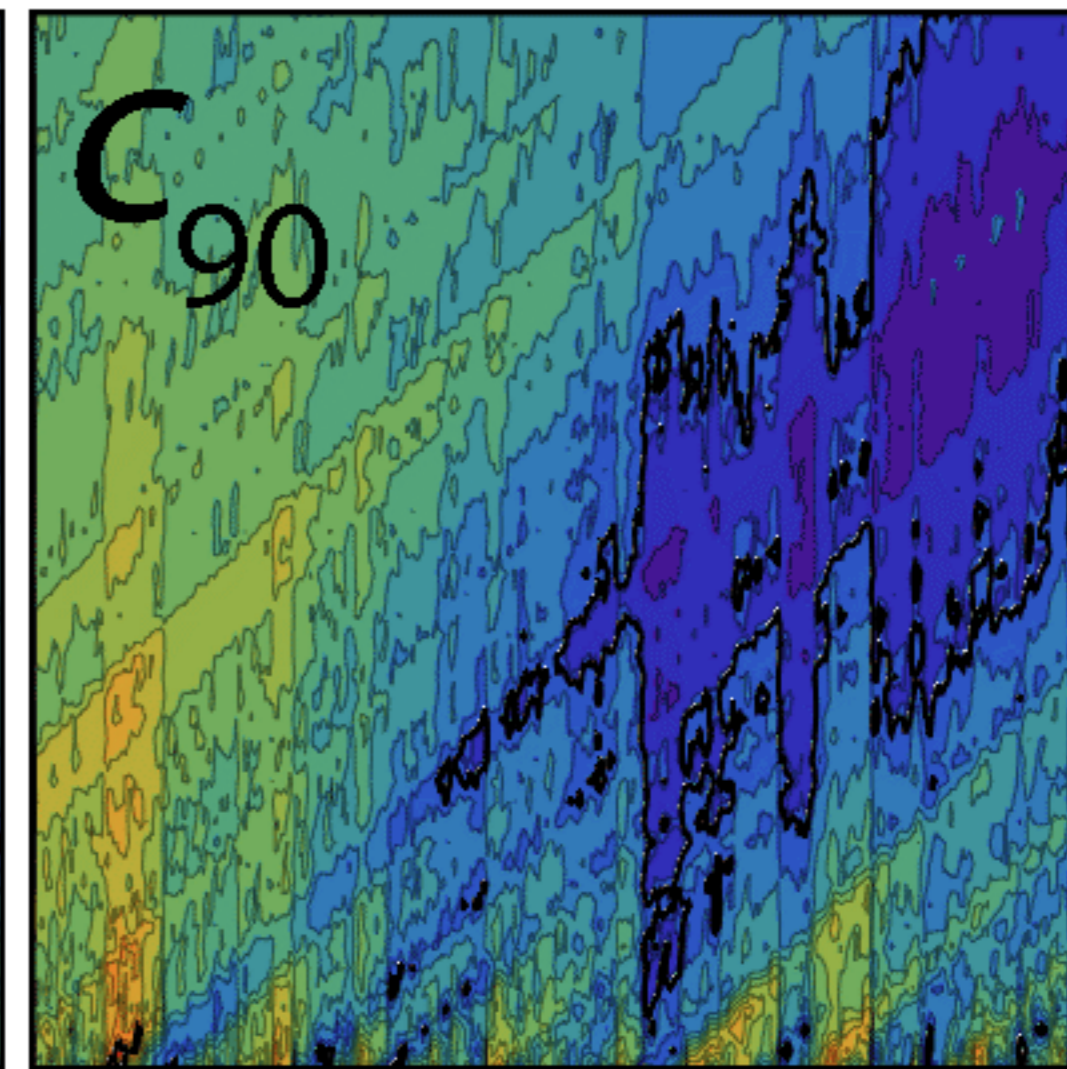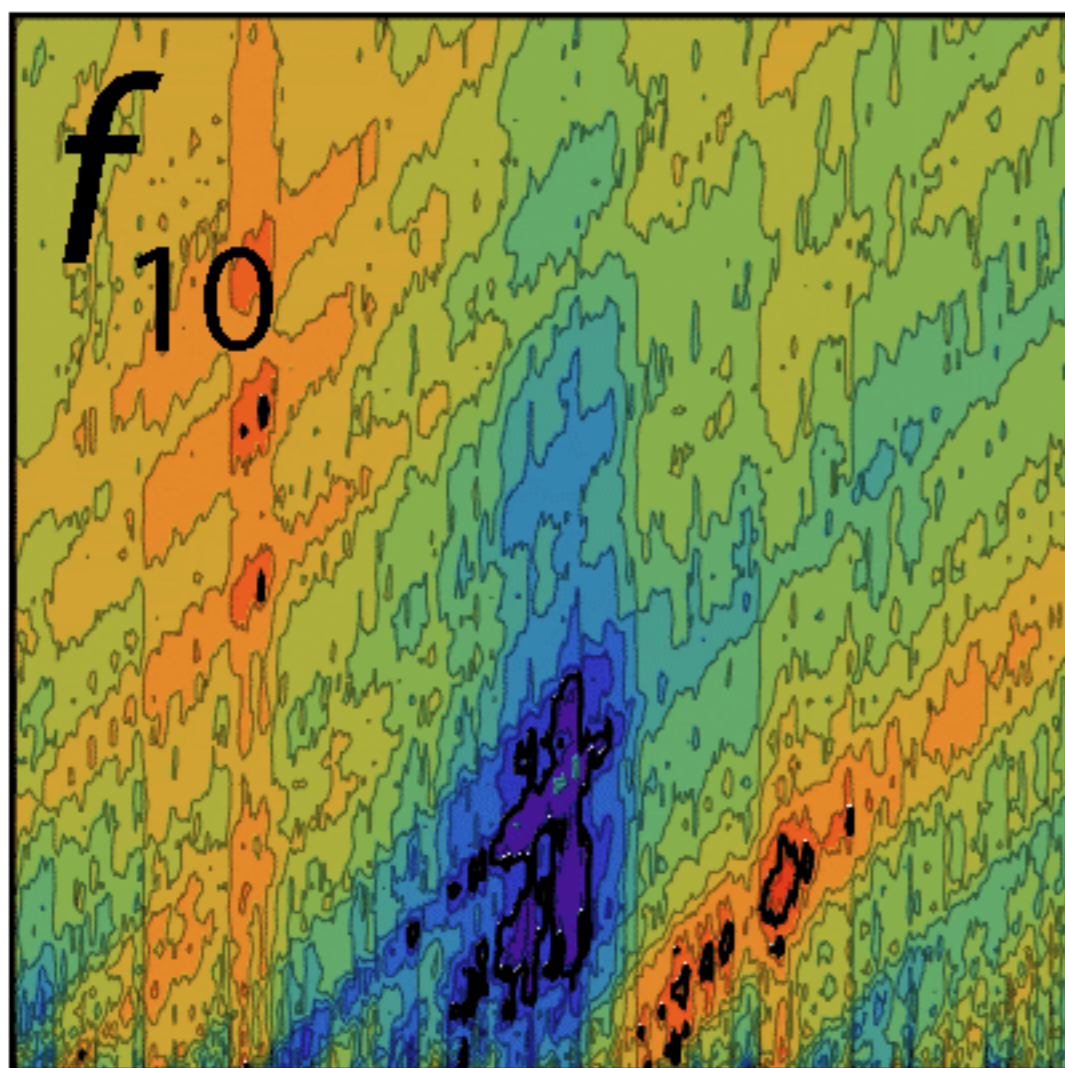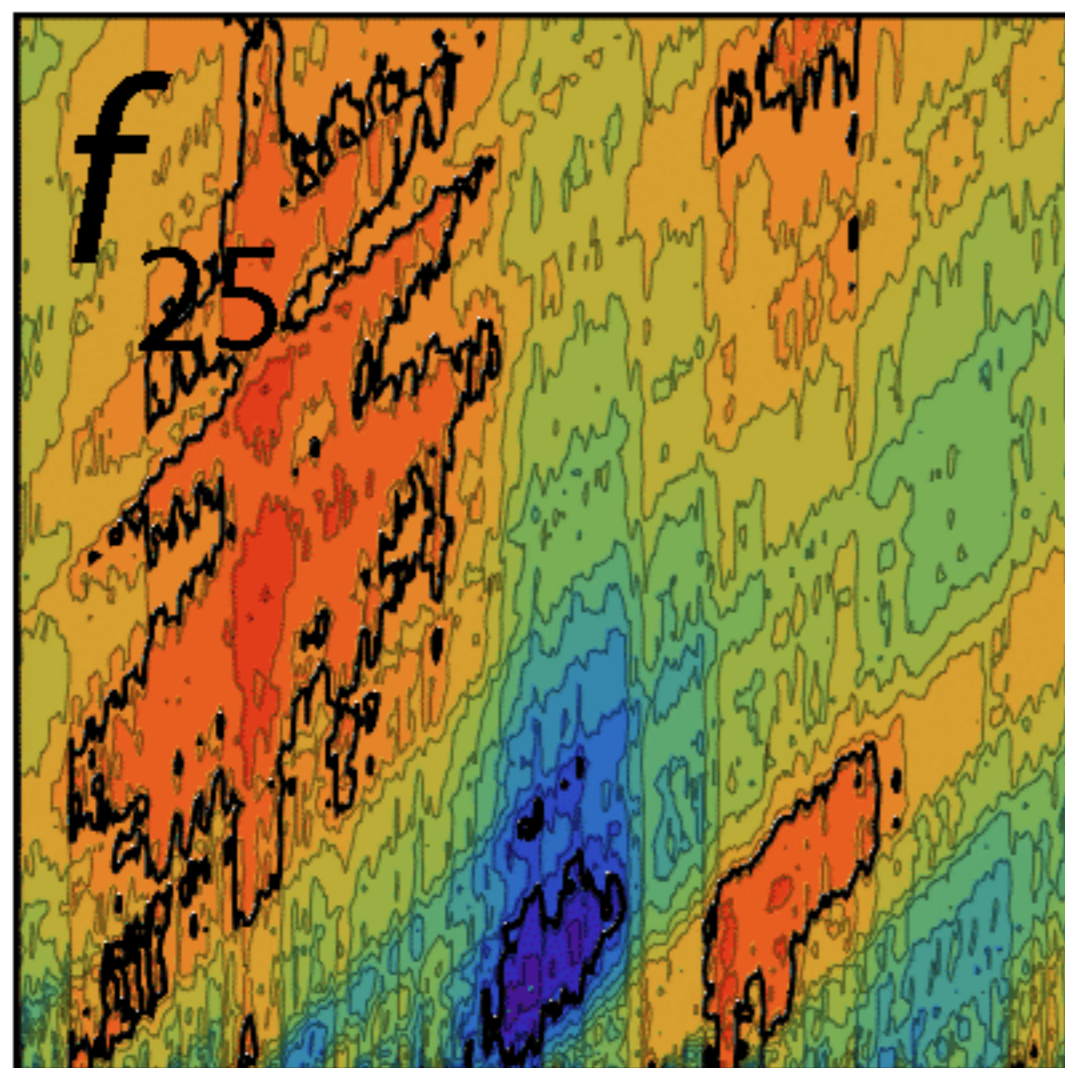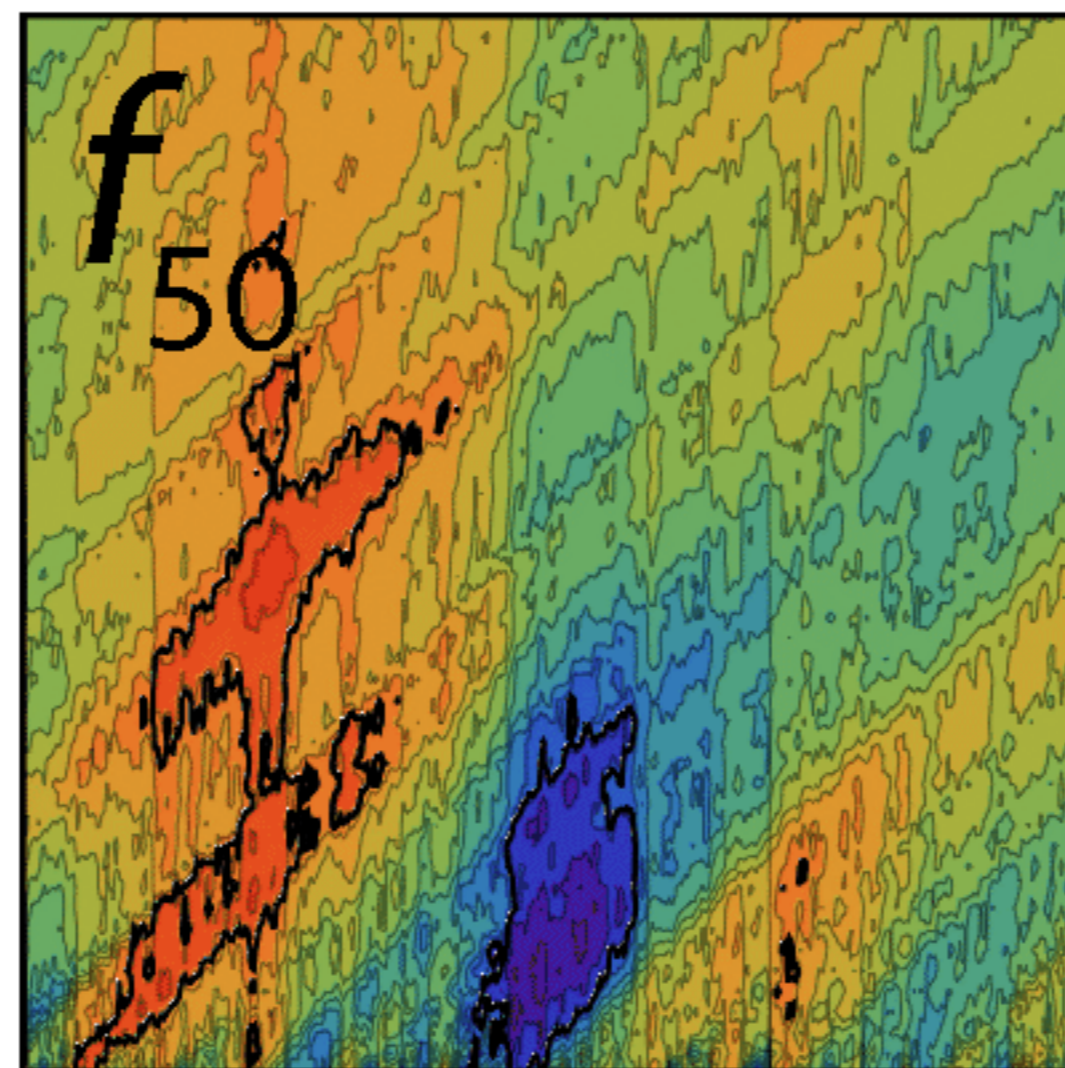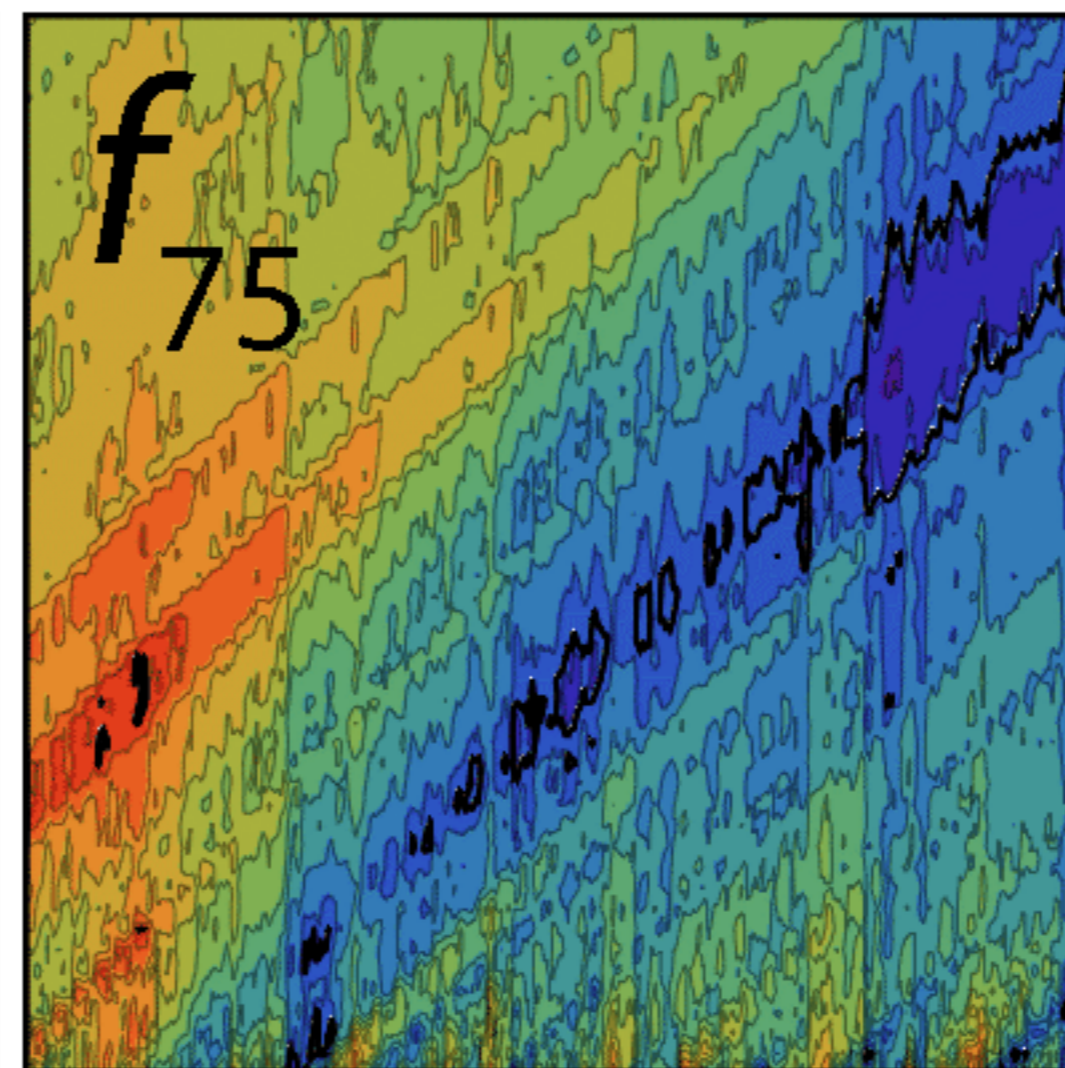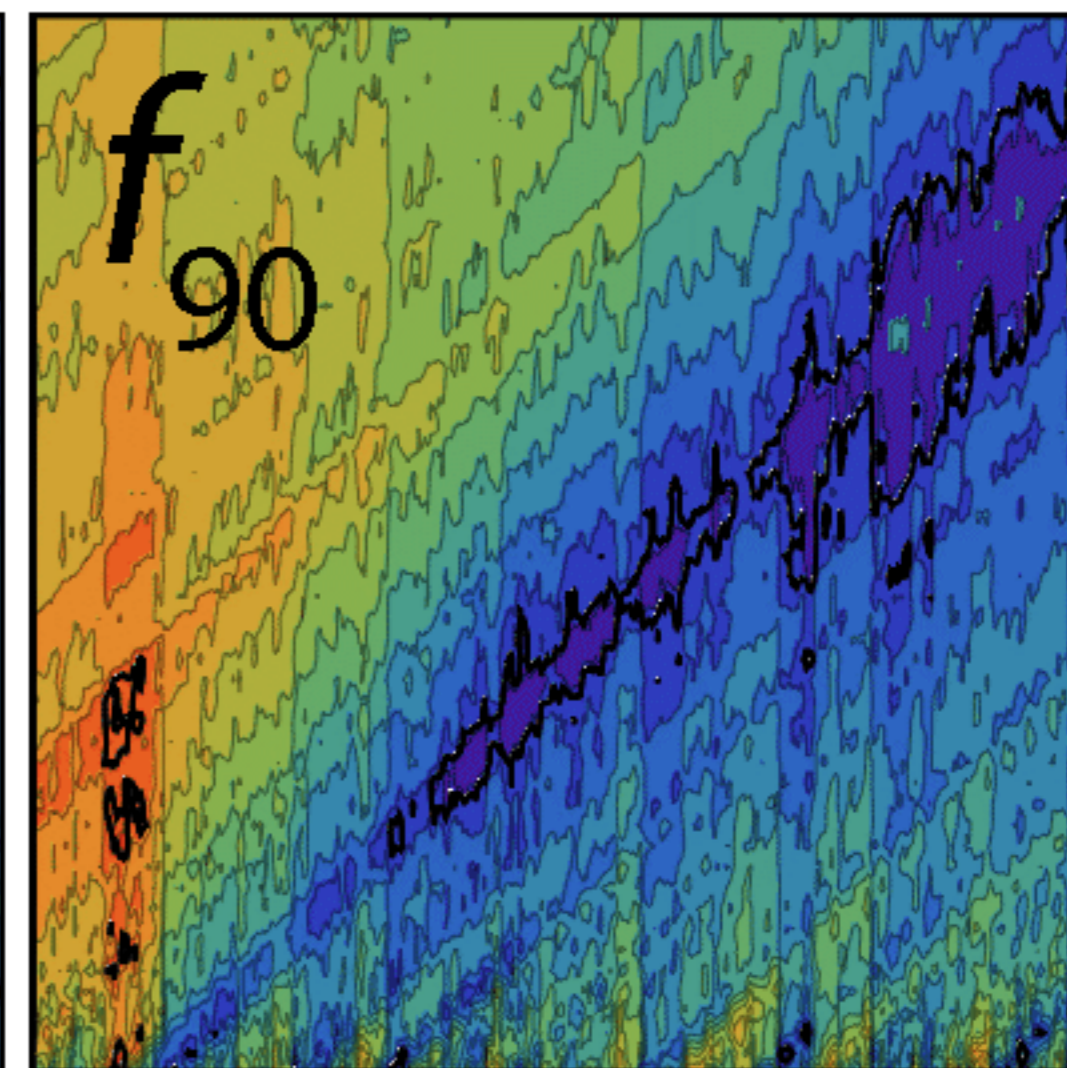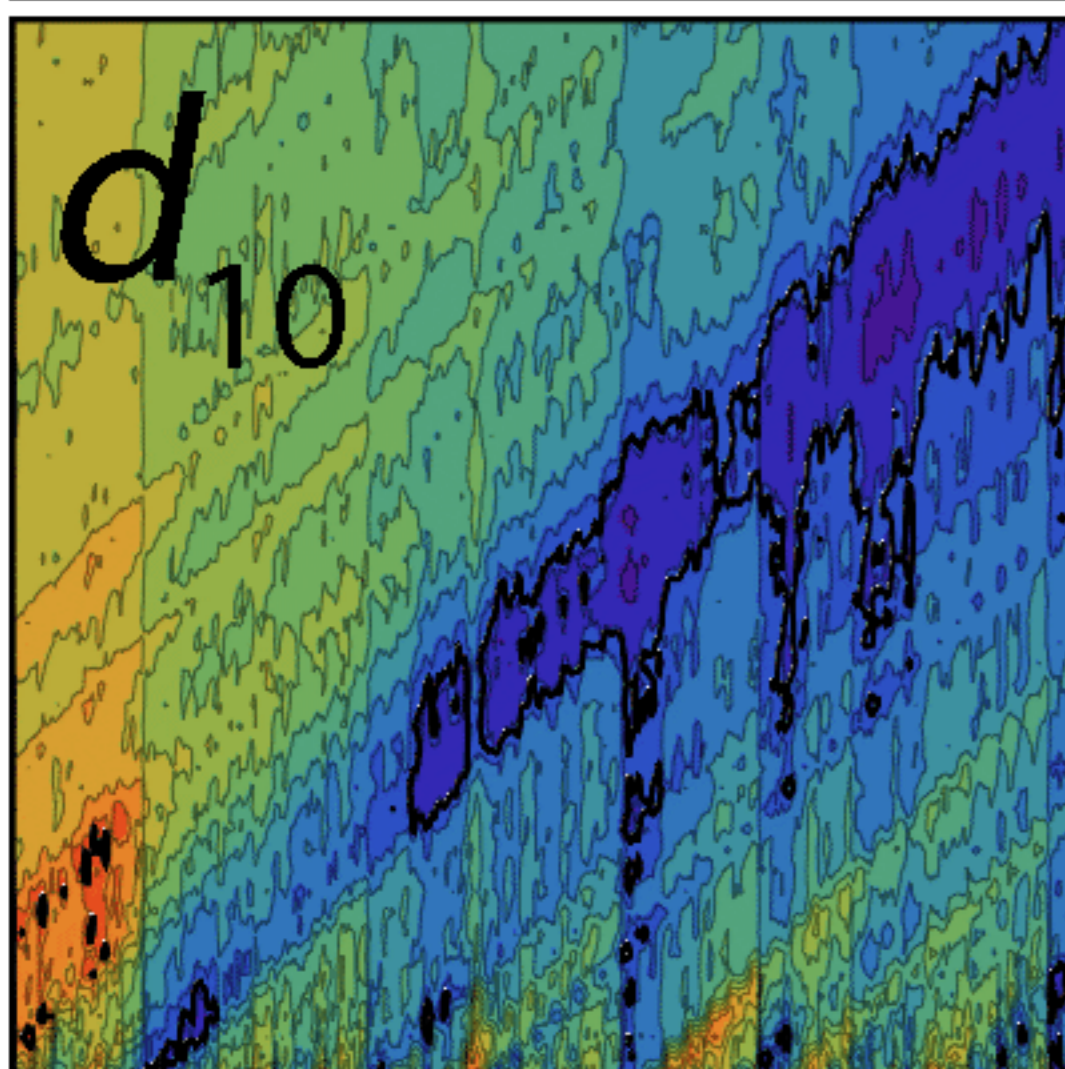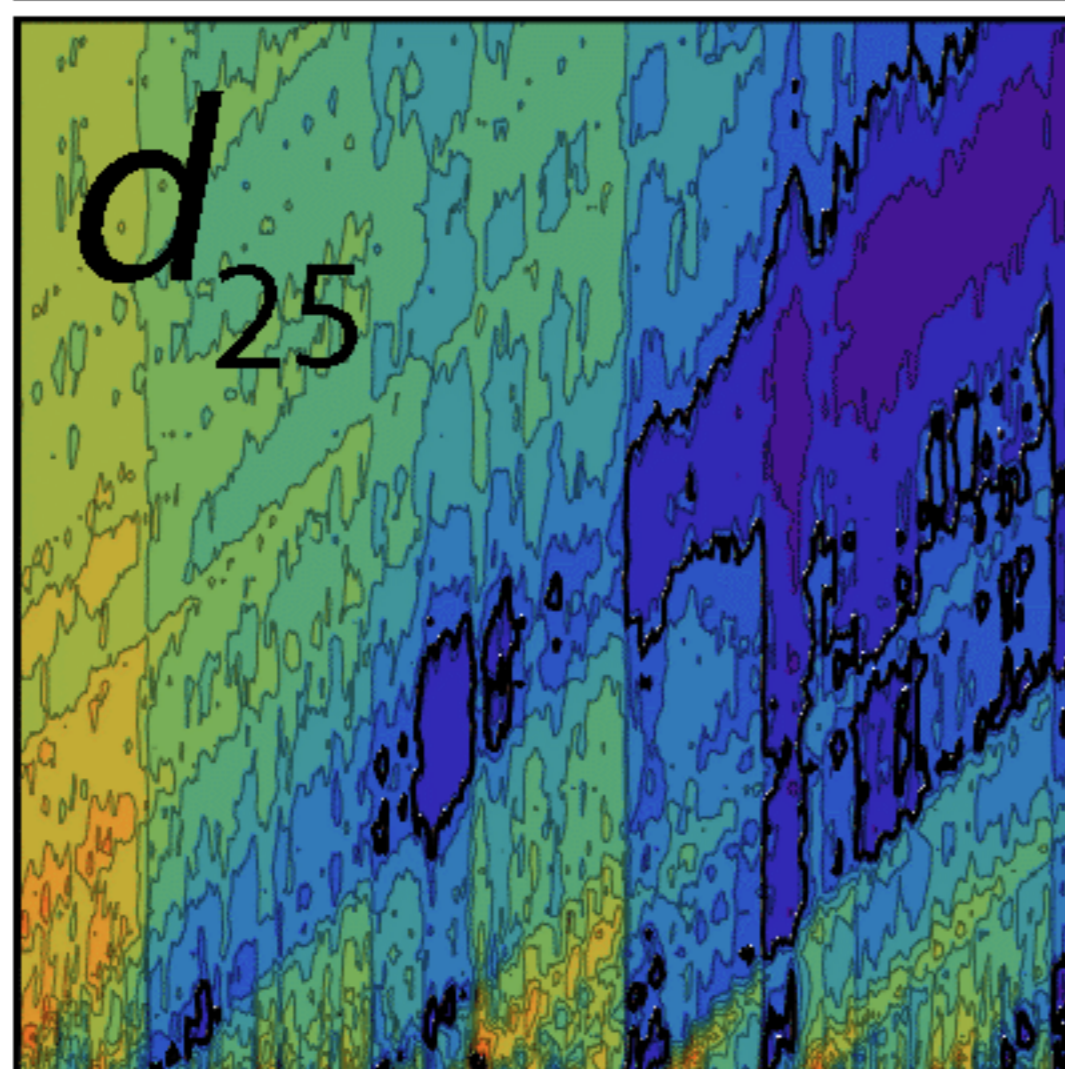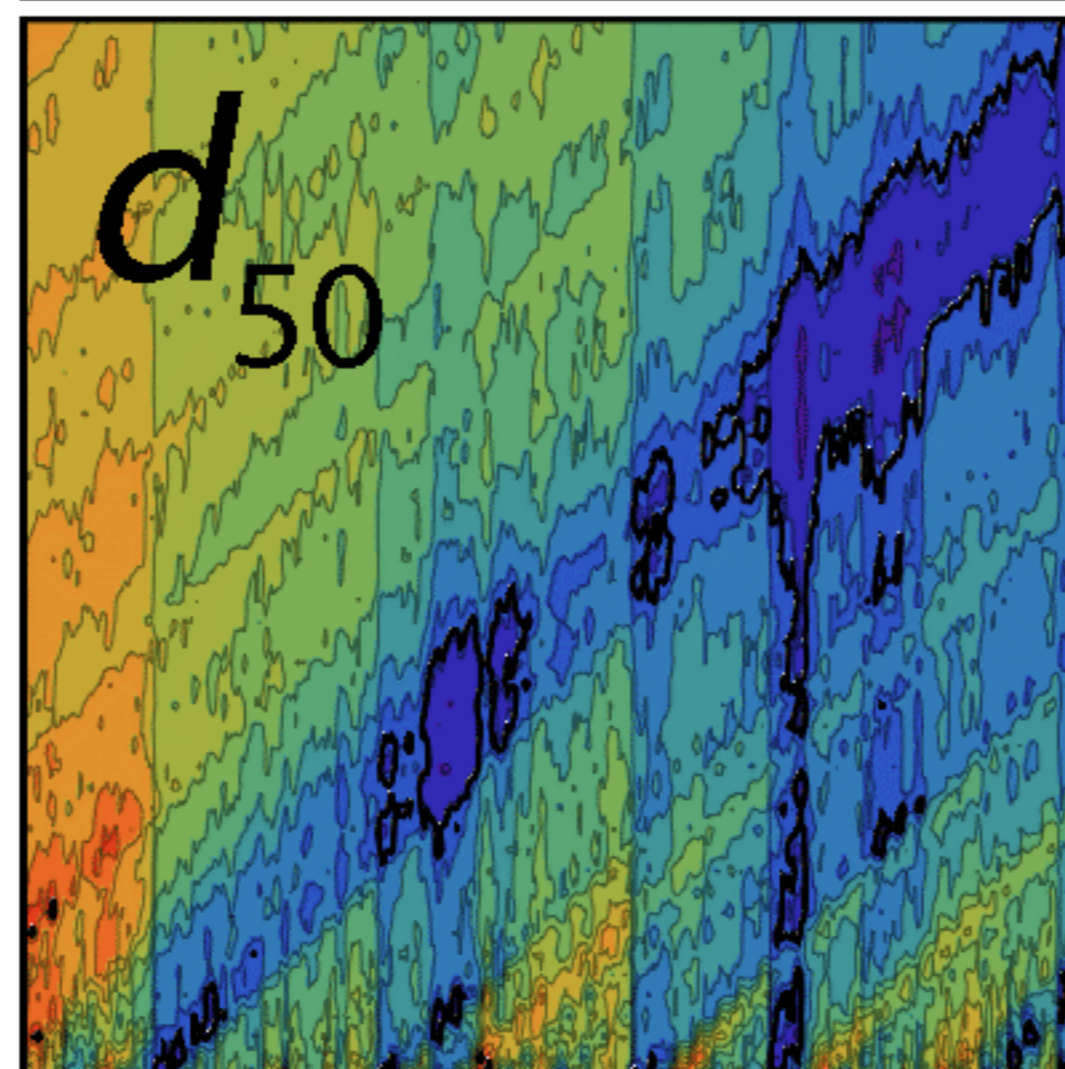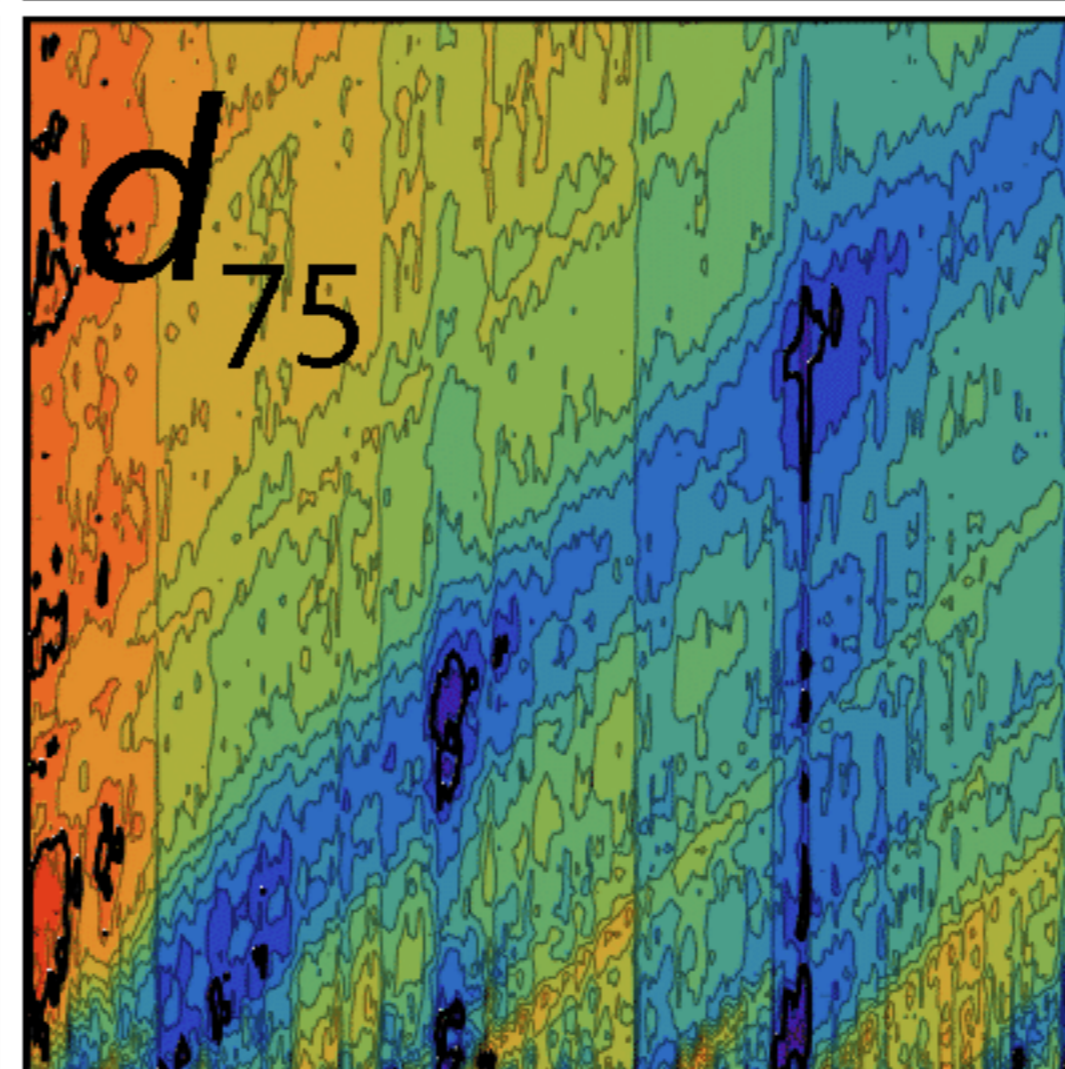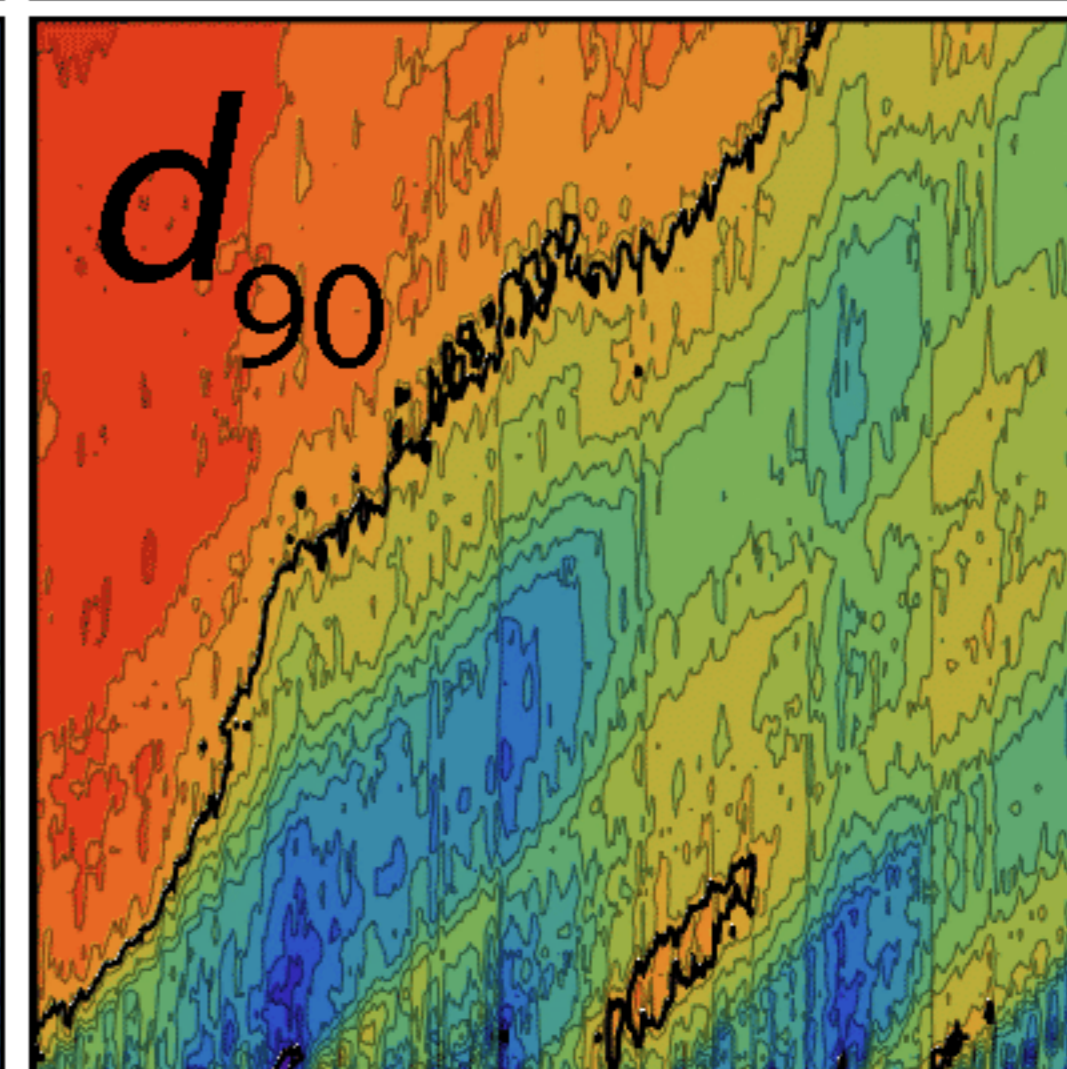

# *Prunus serotina*

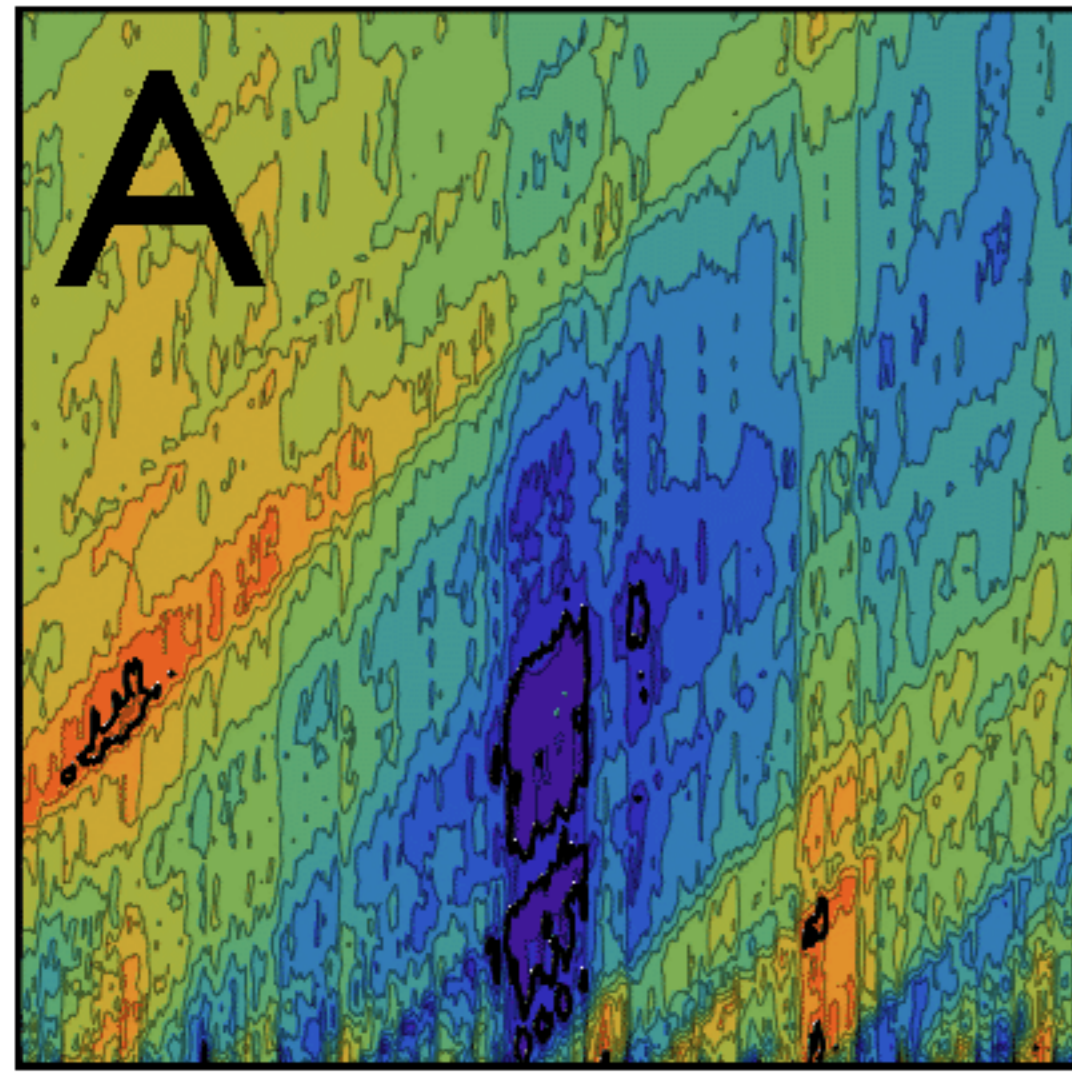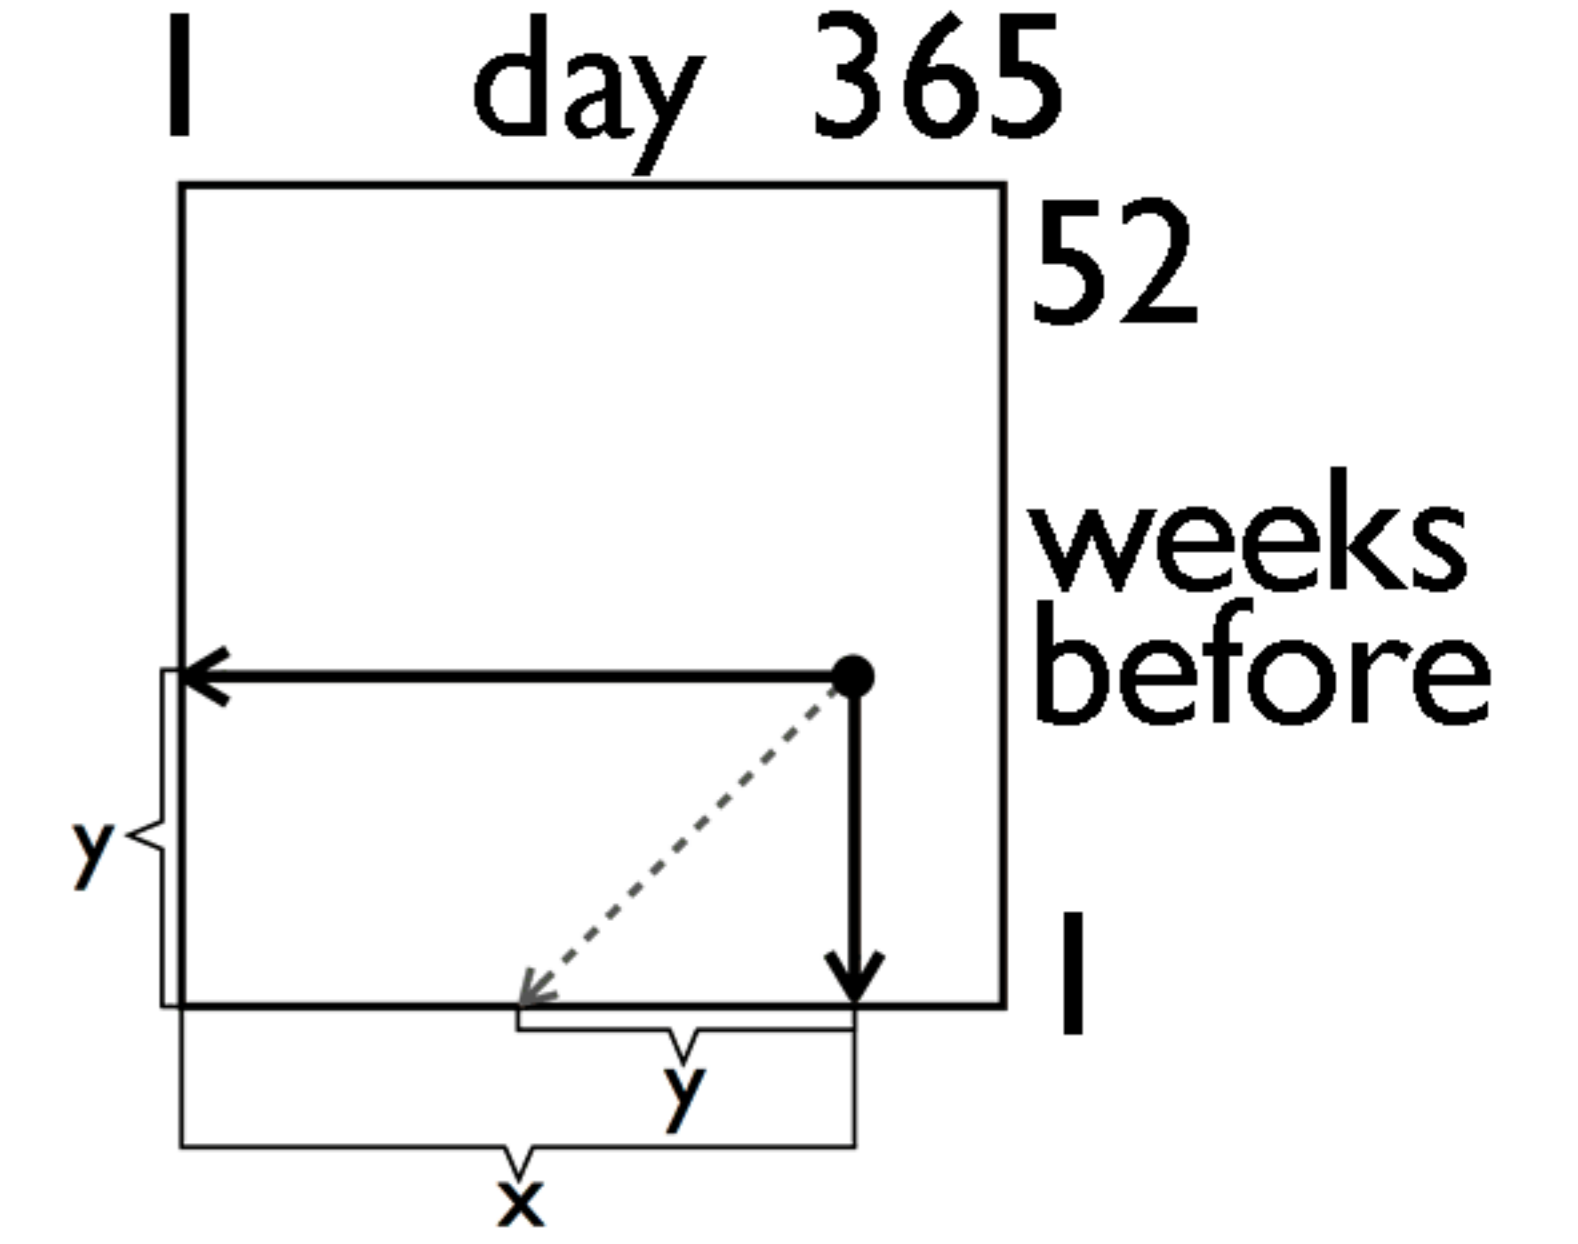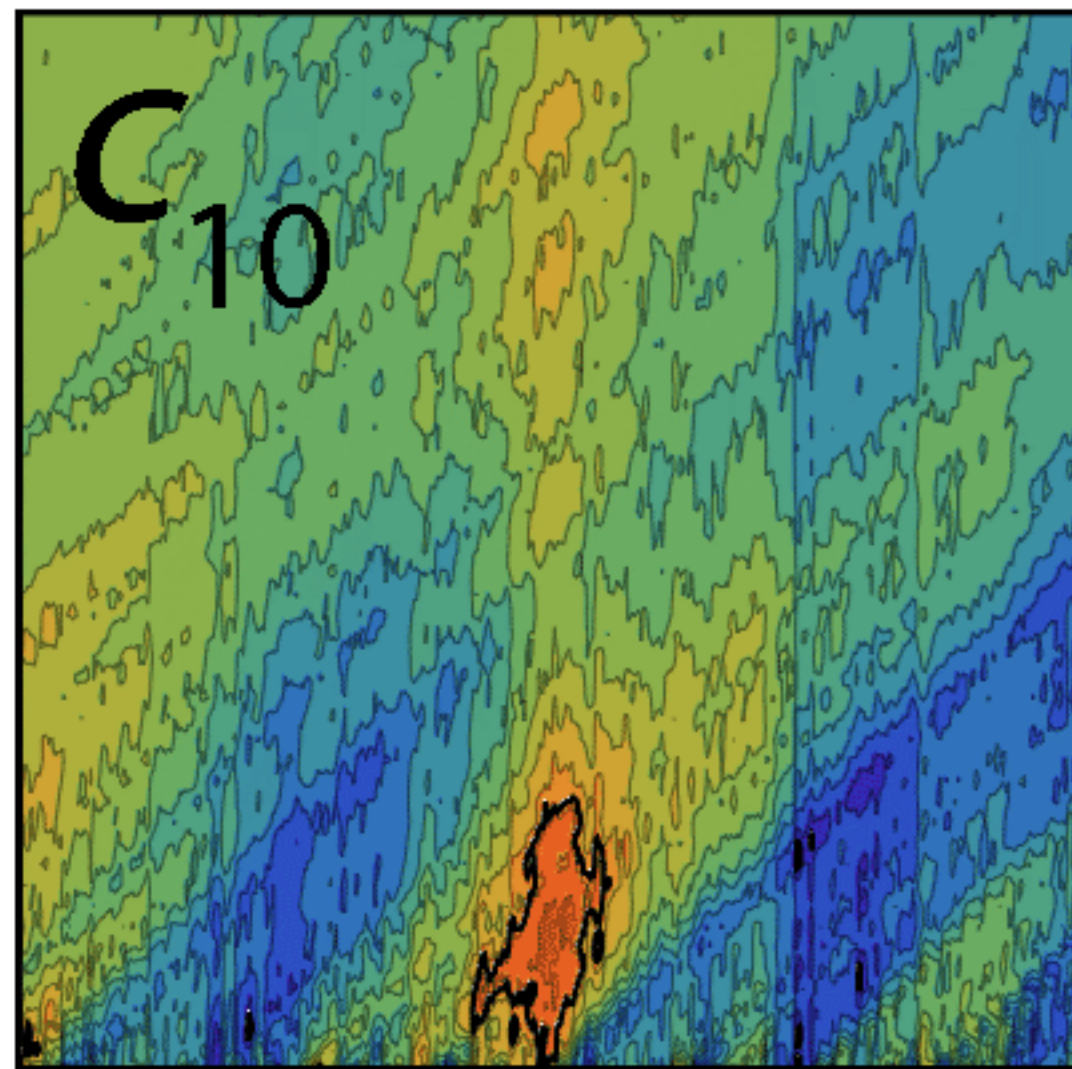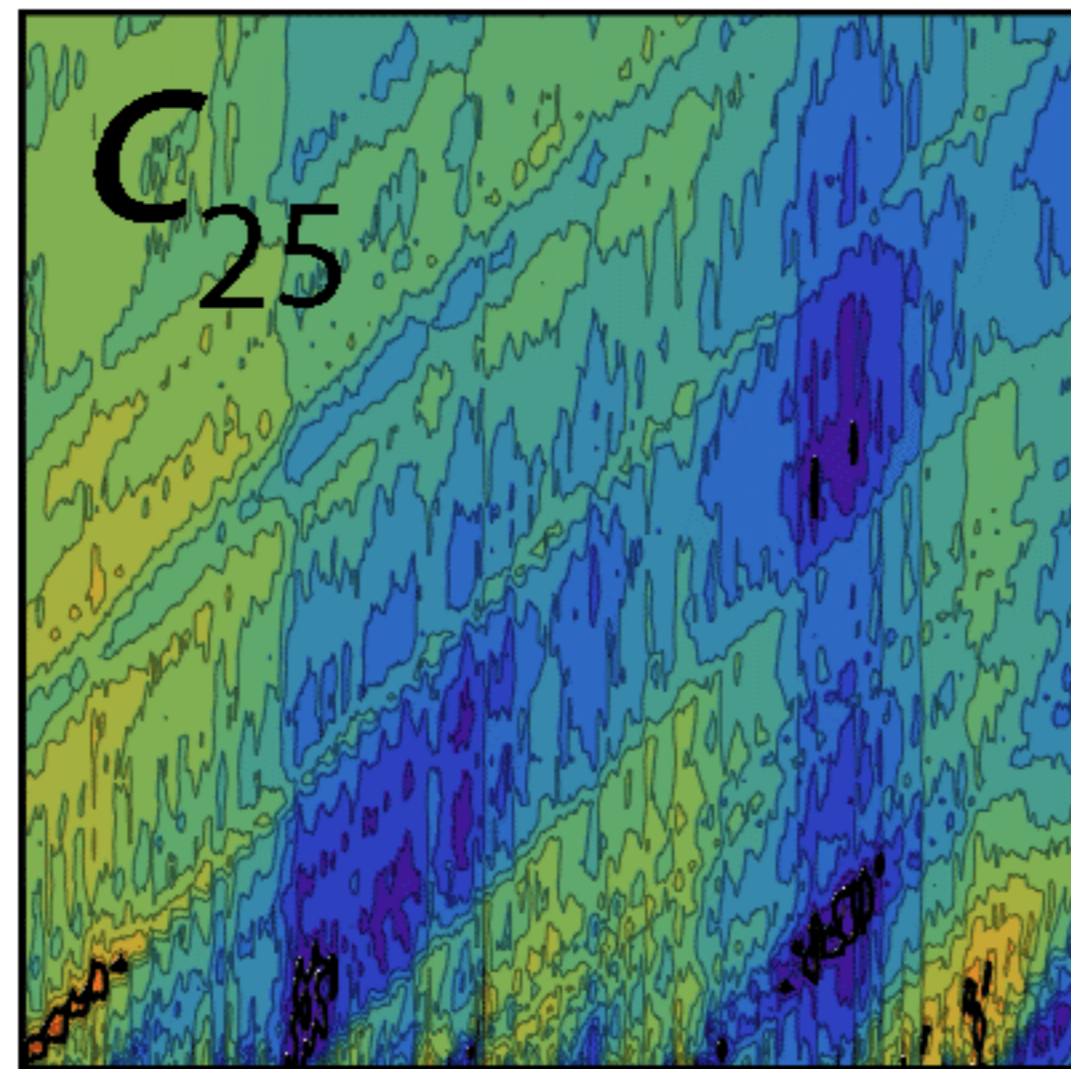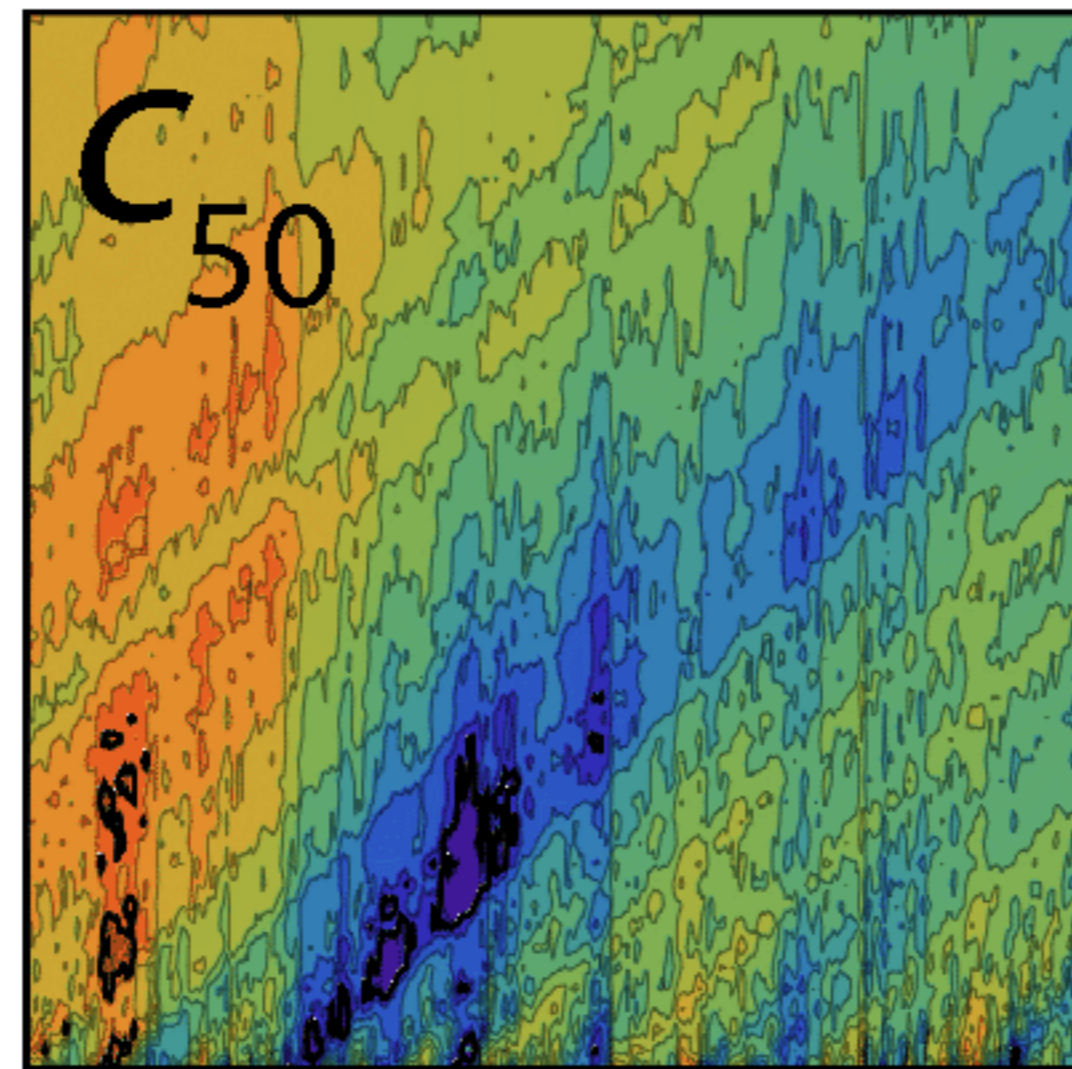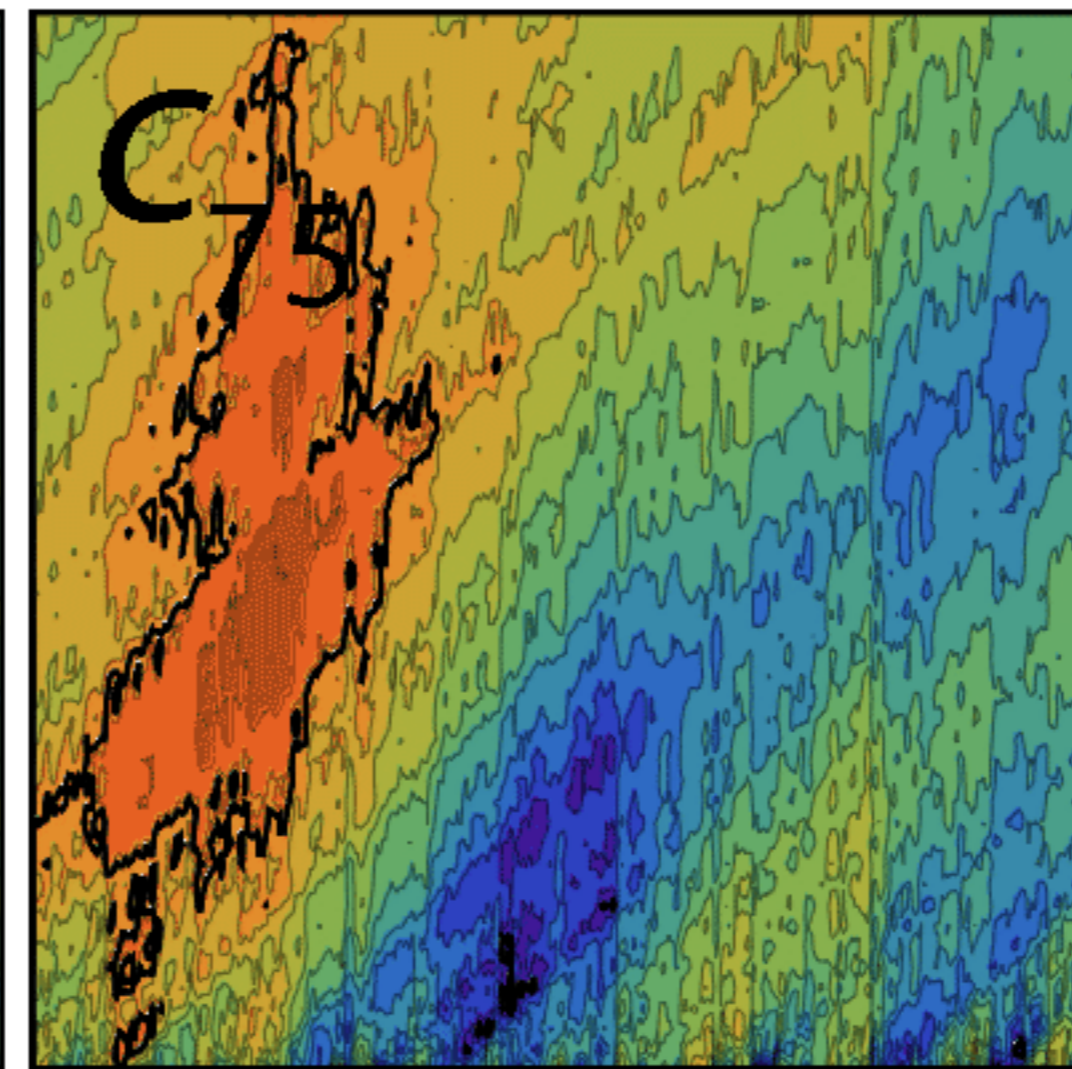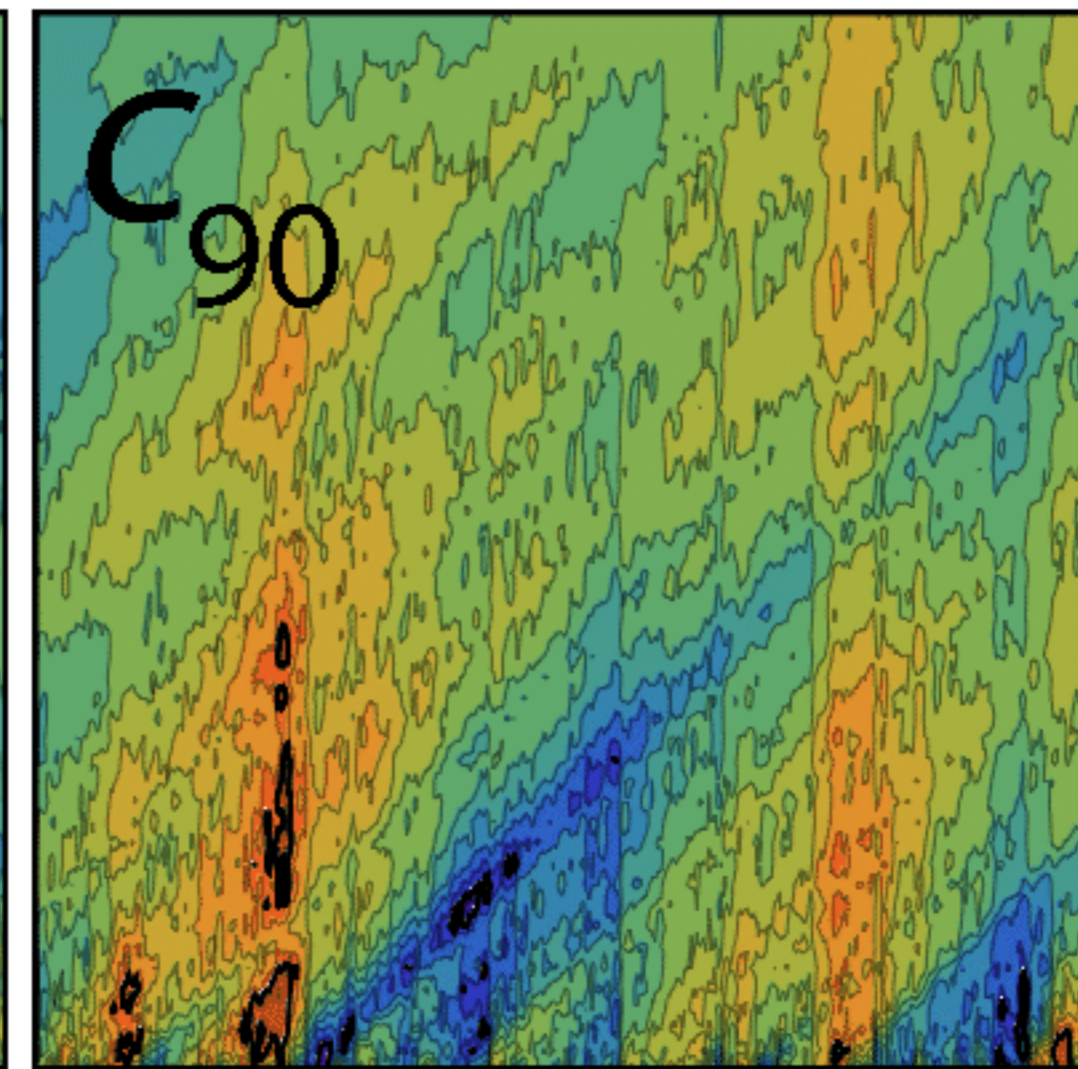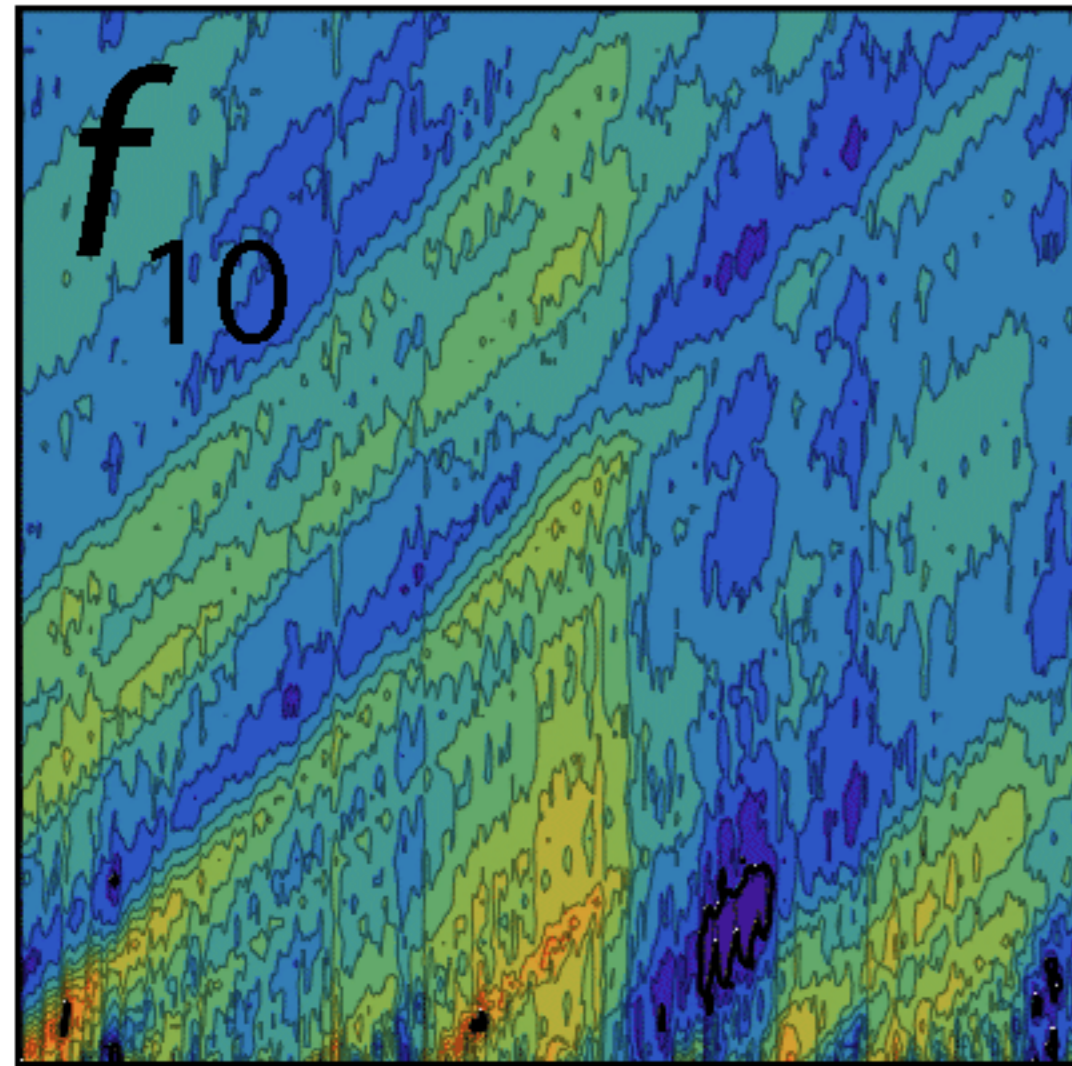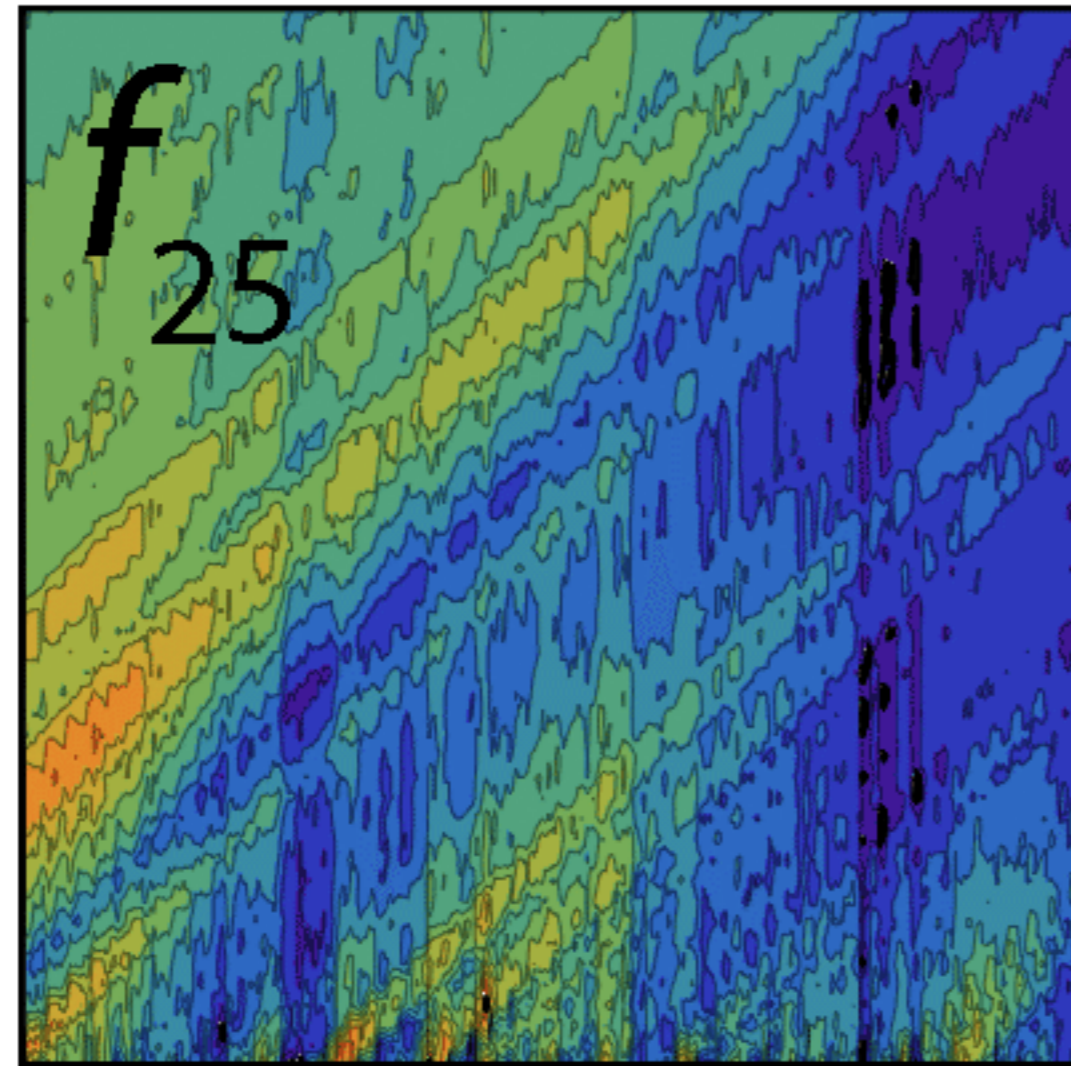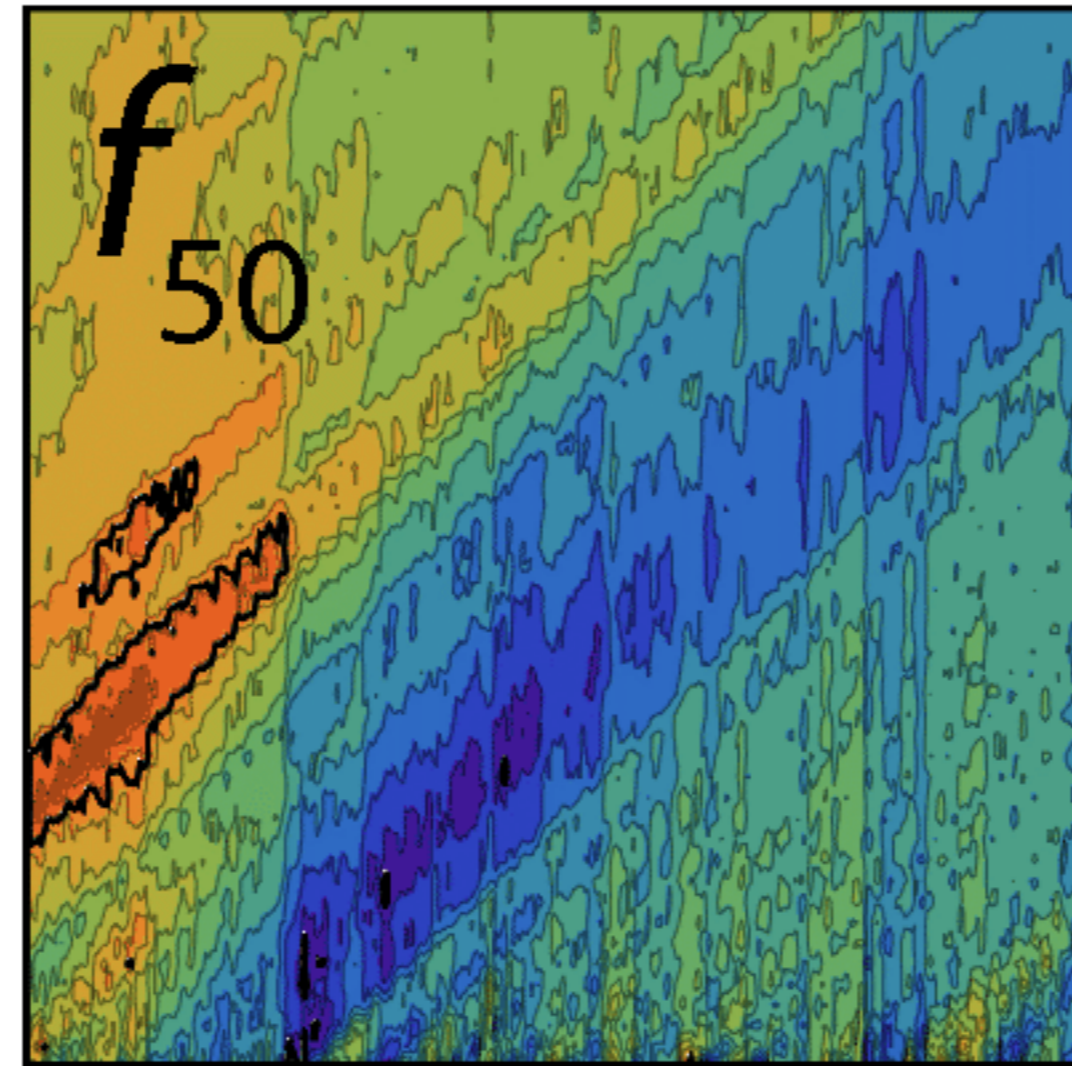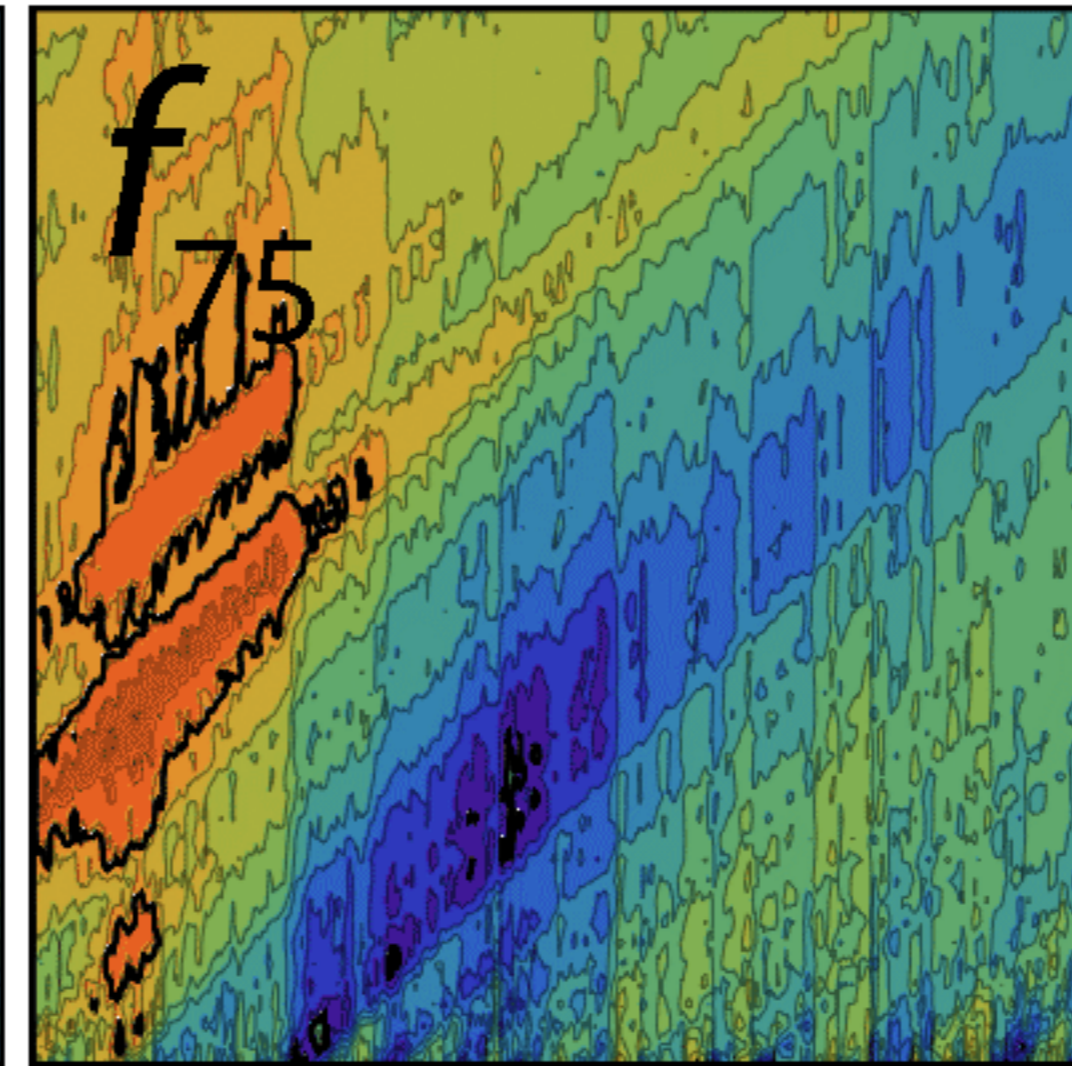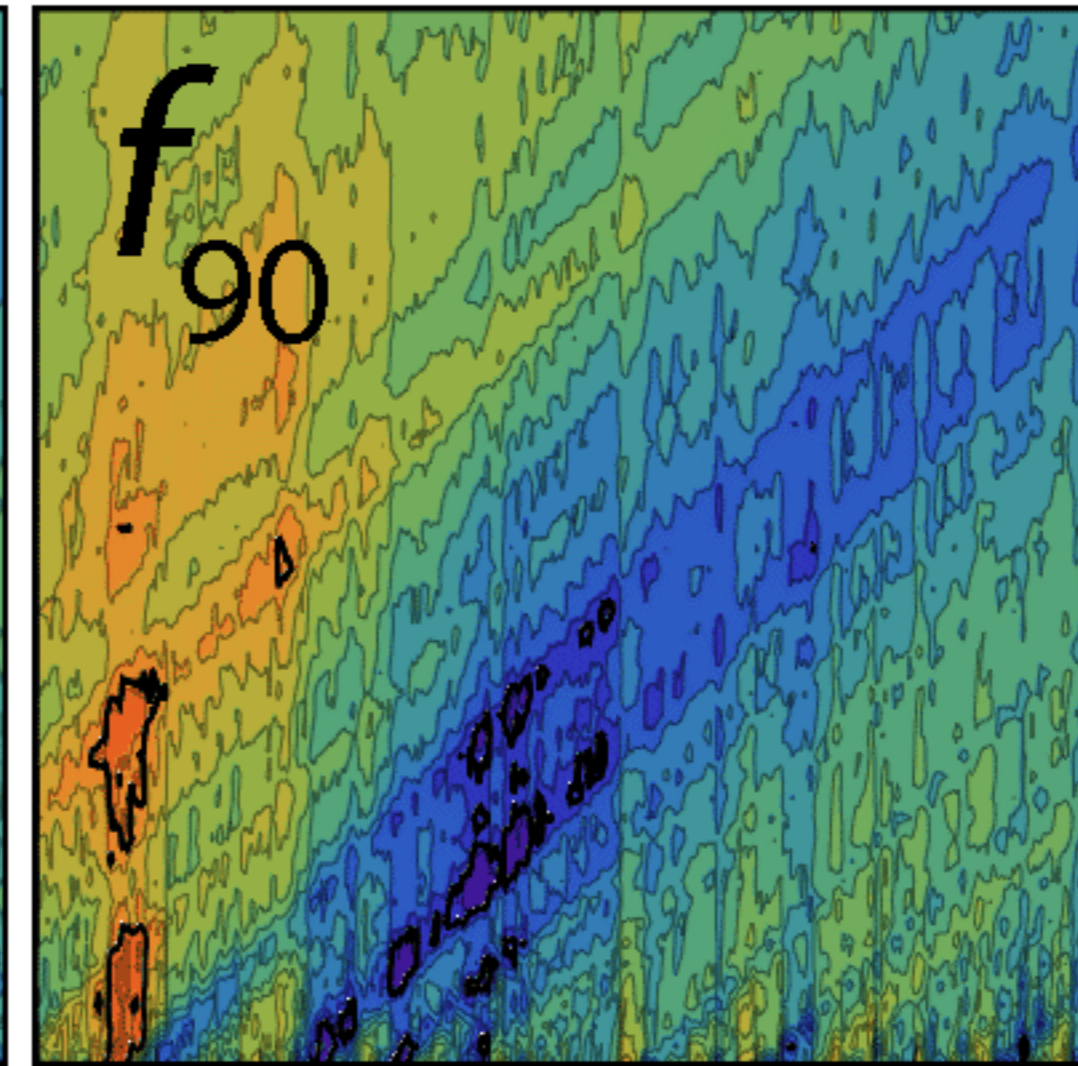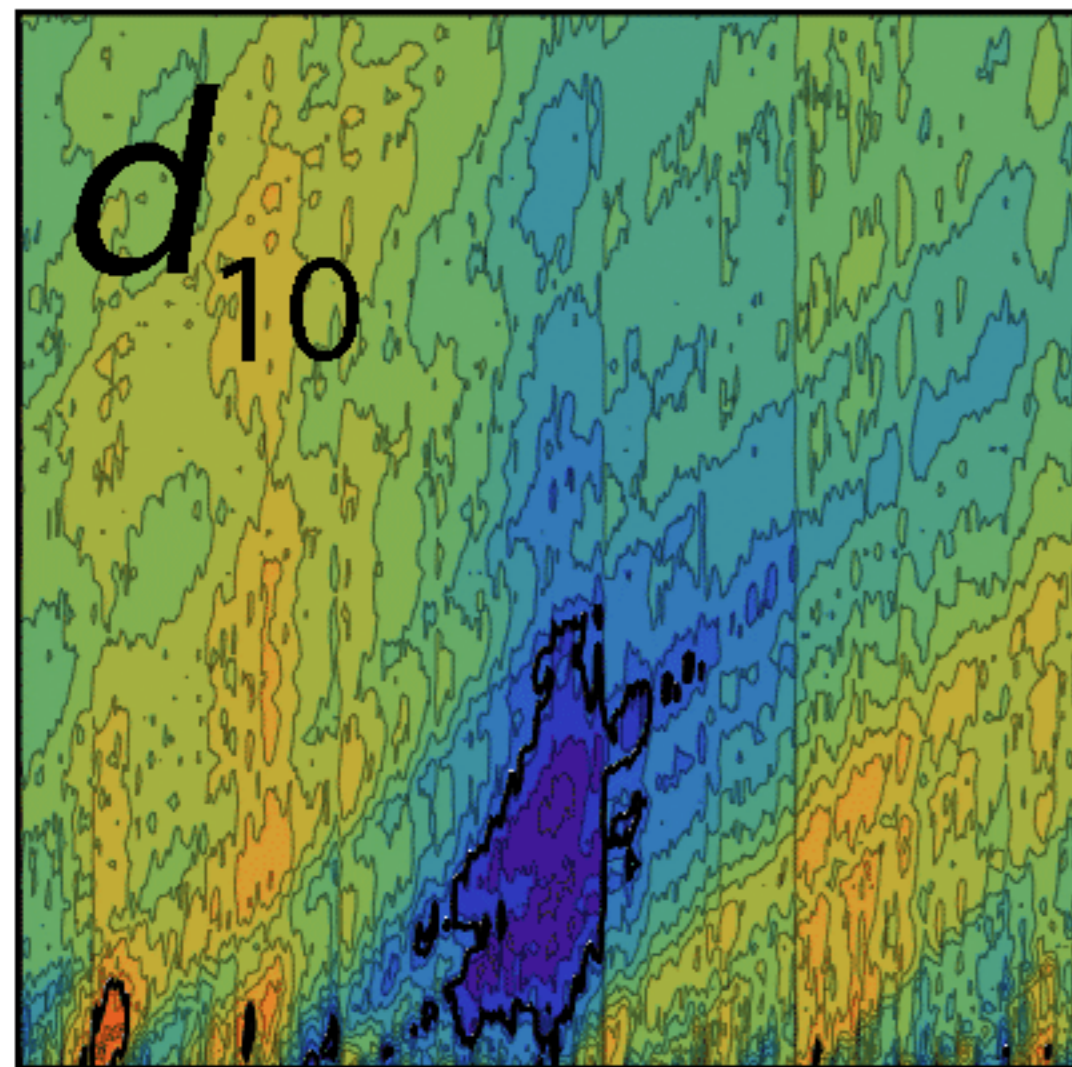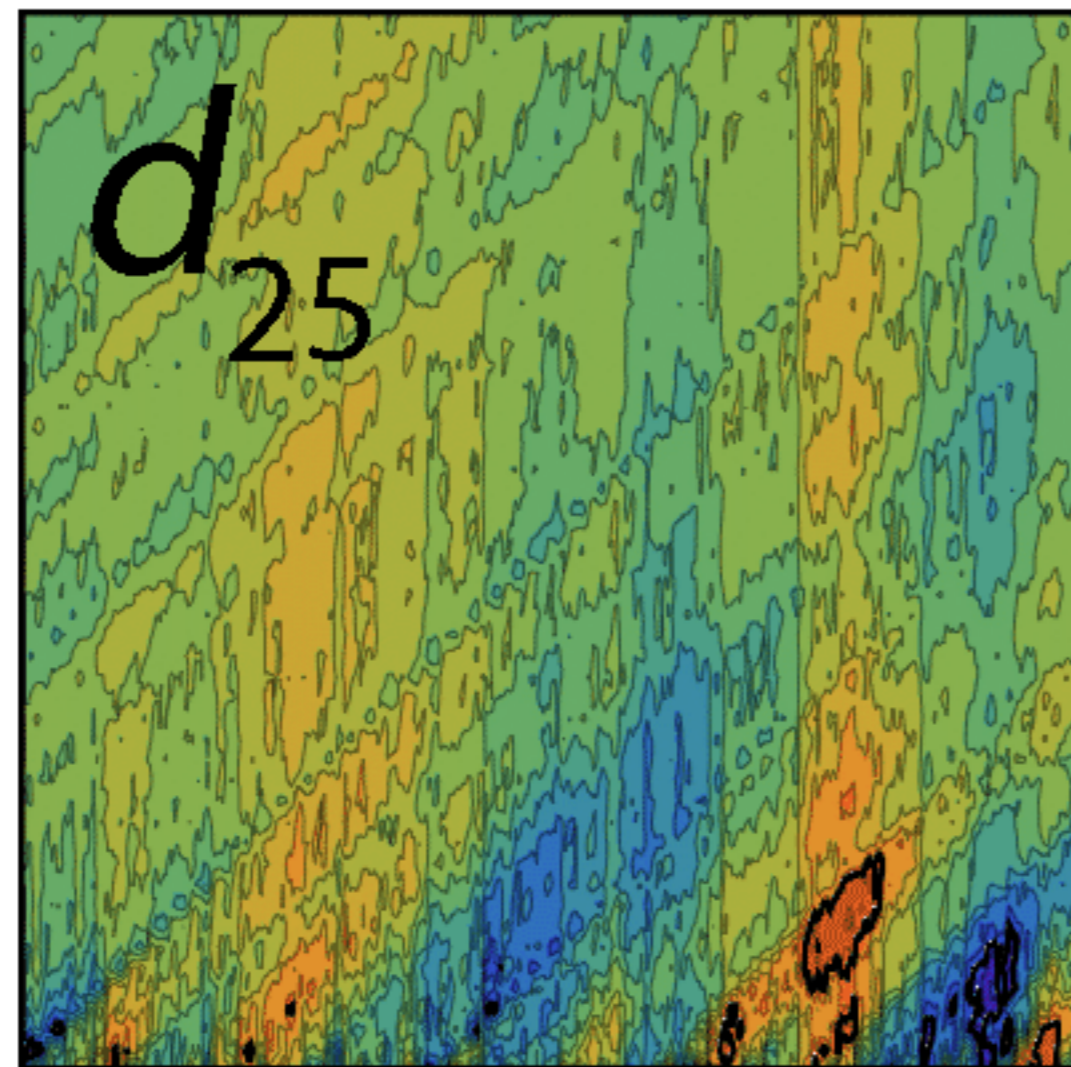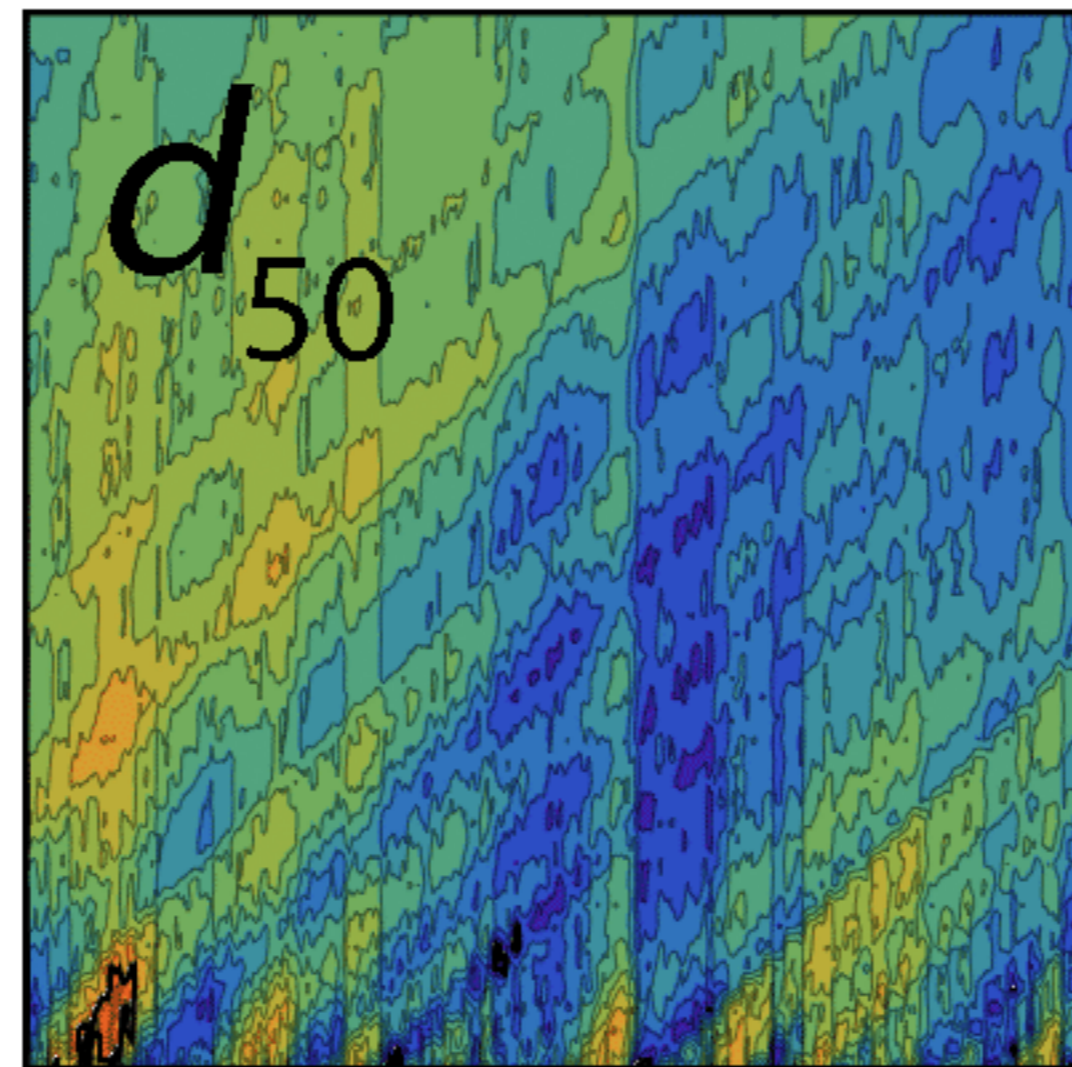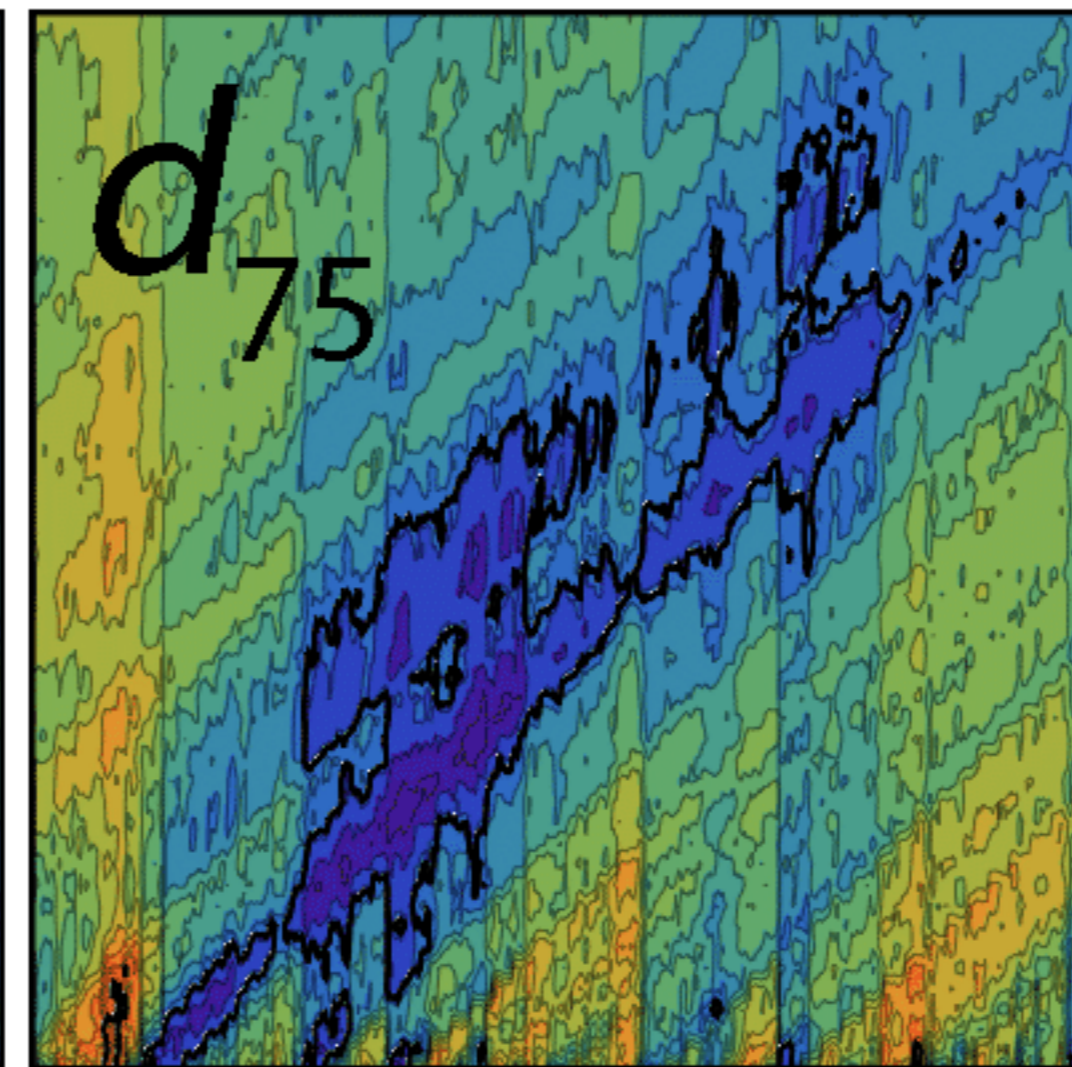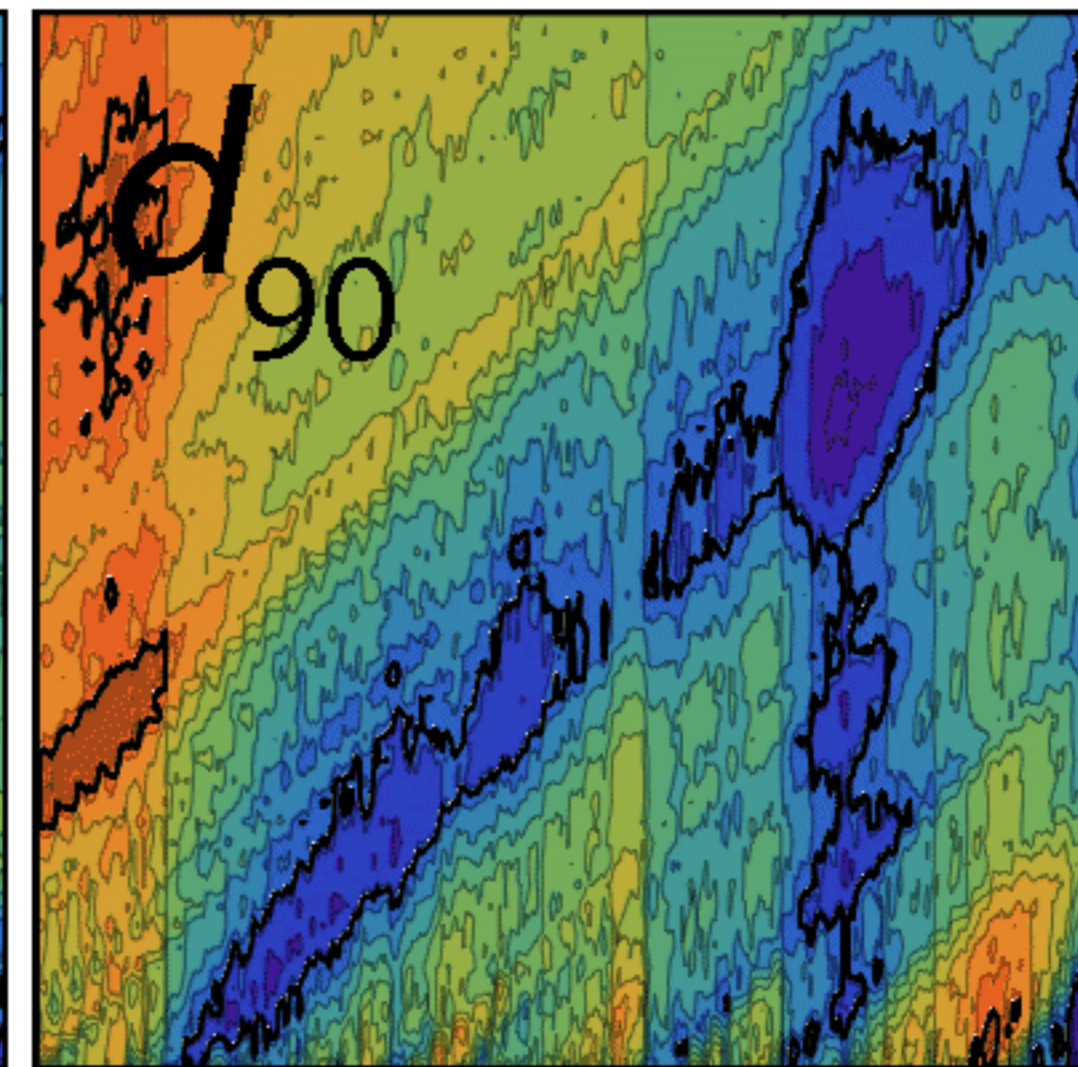

# *Quercus alba*

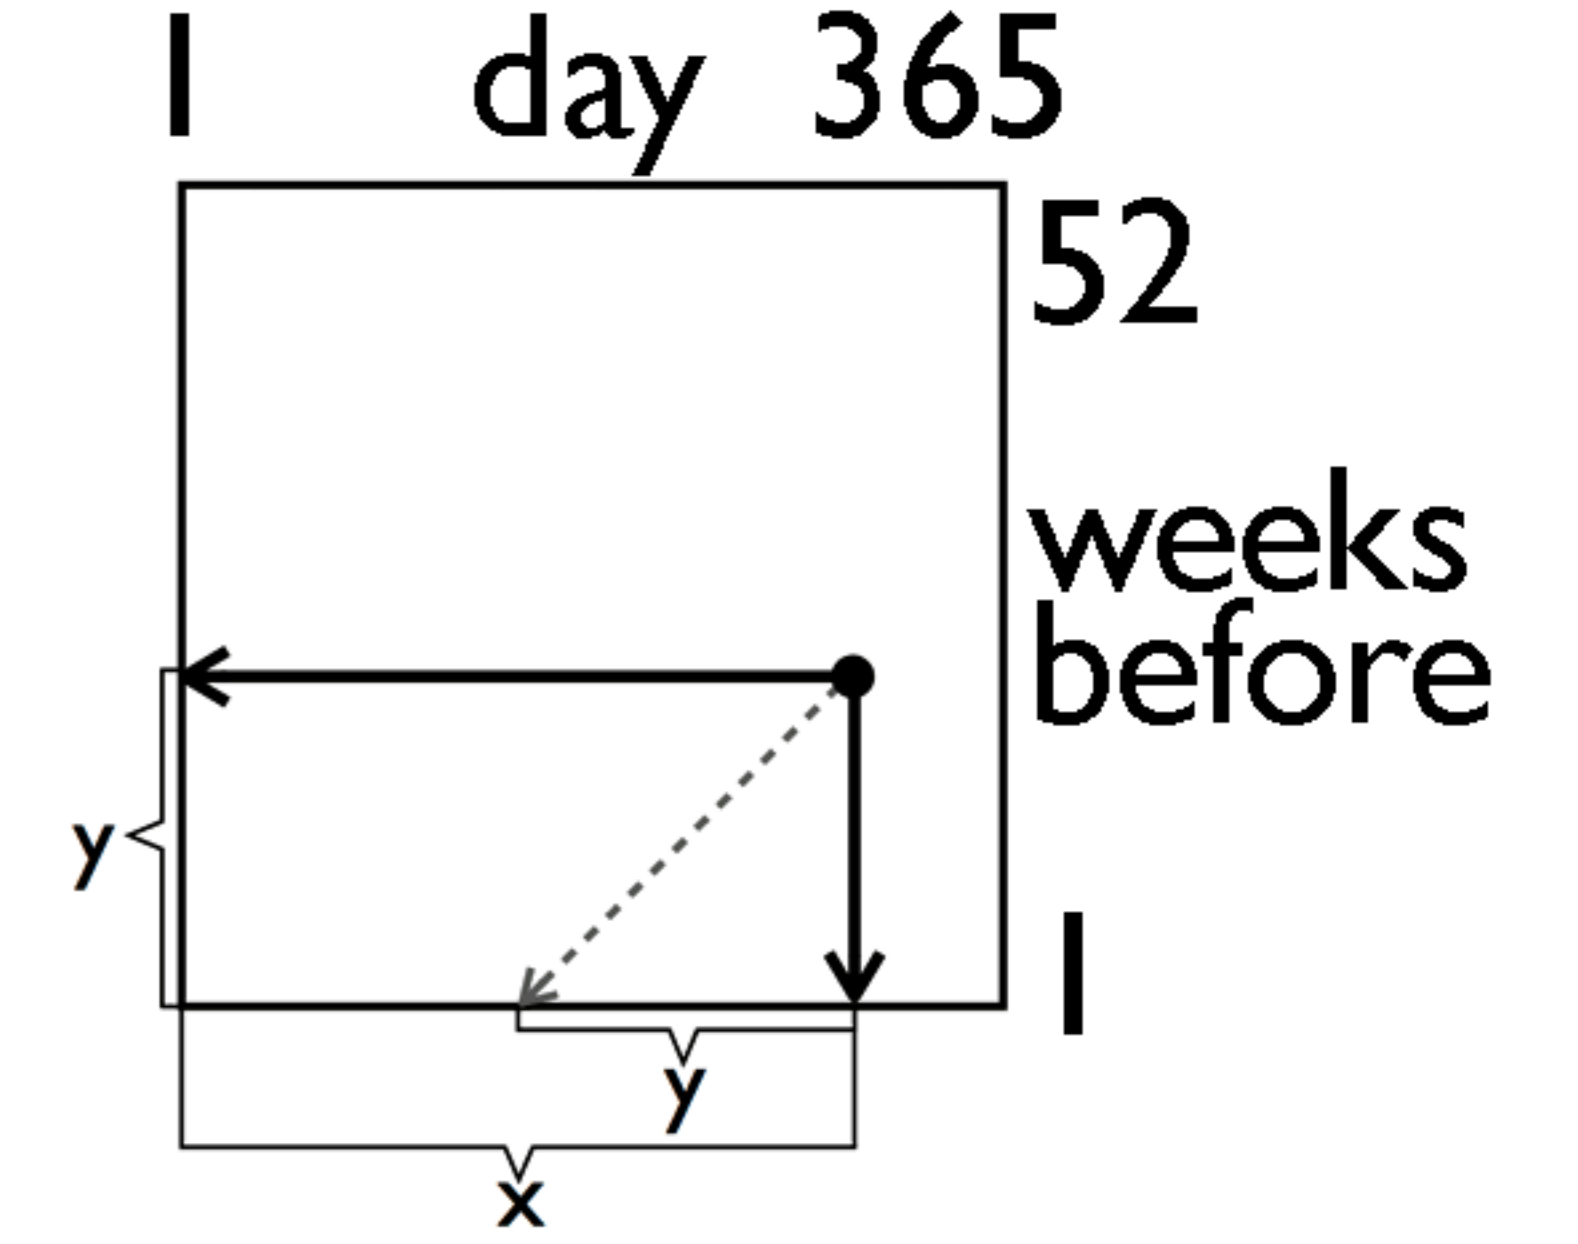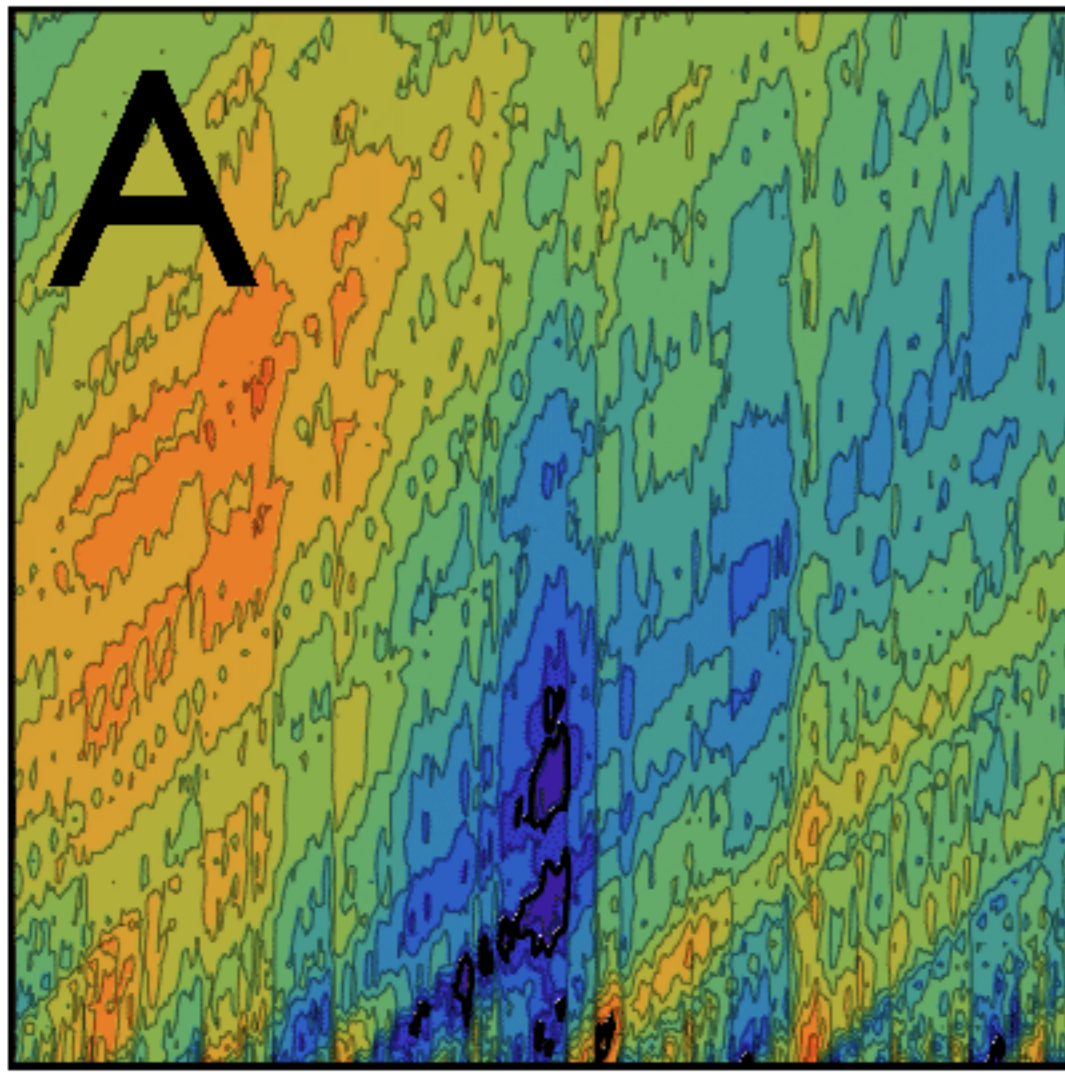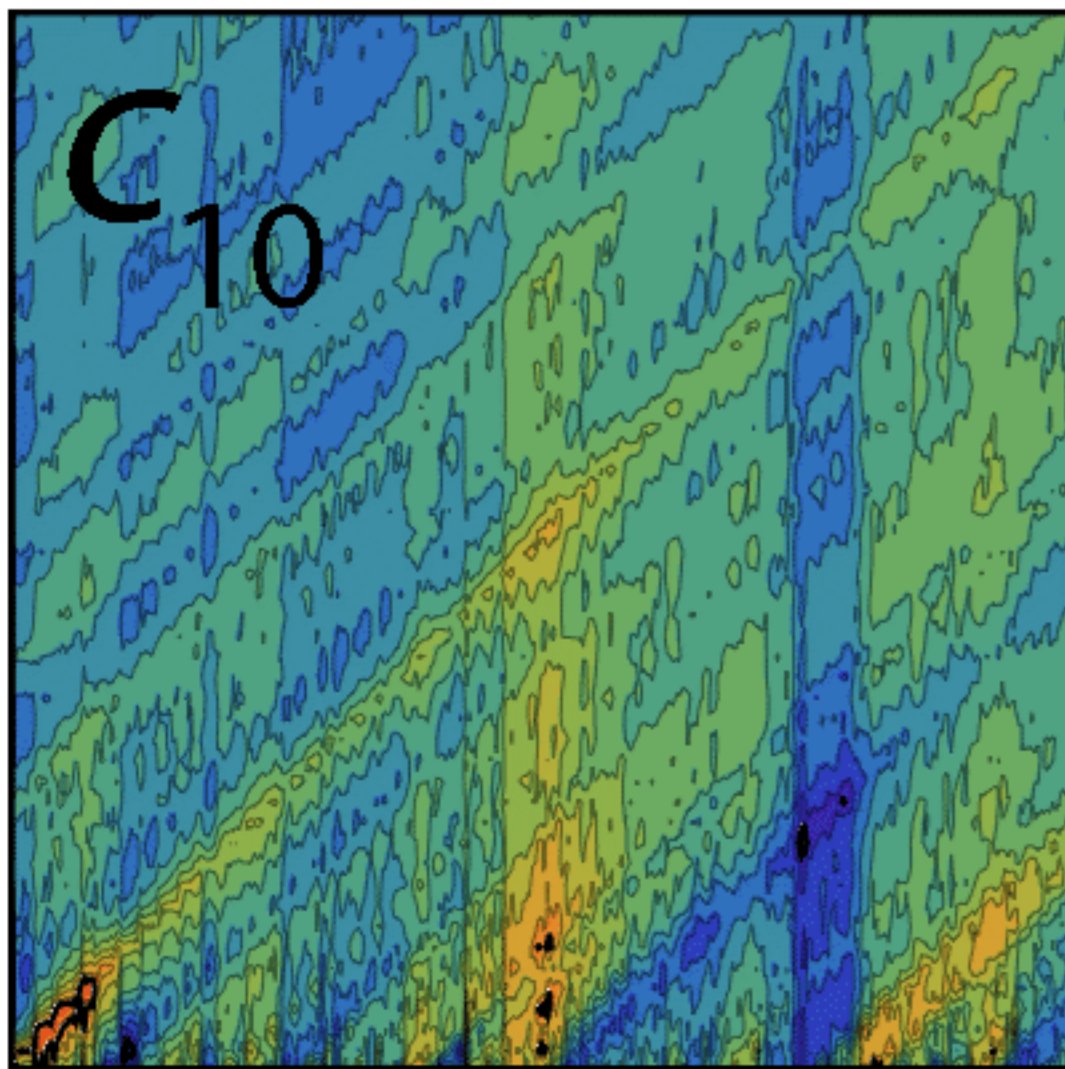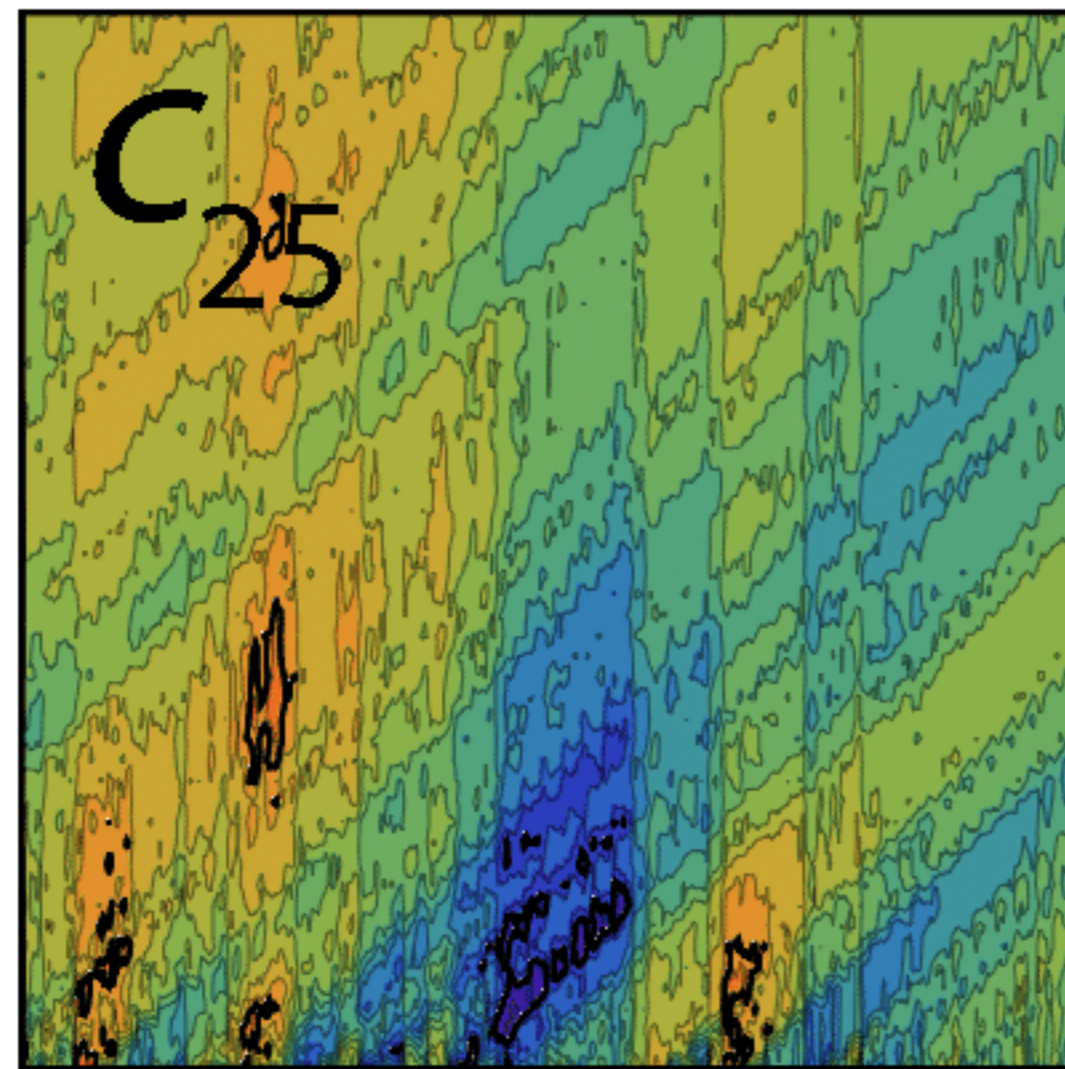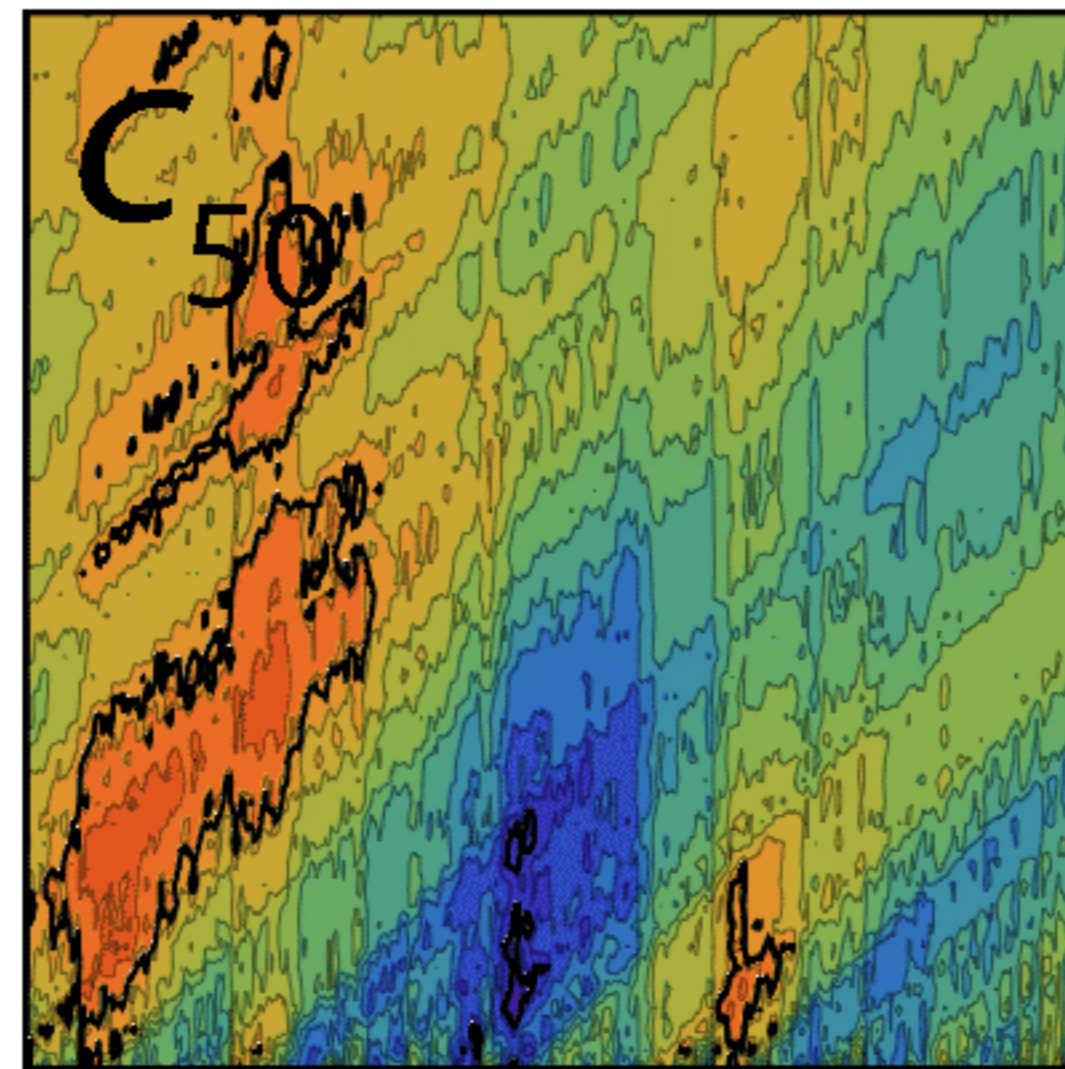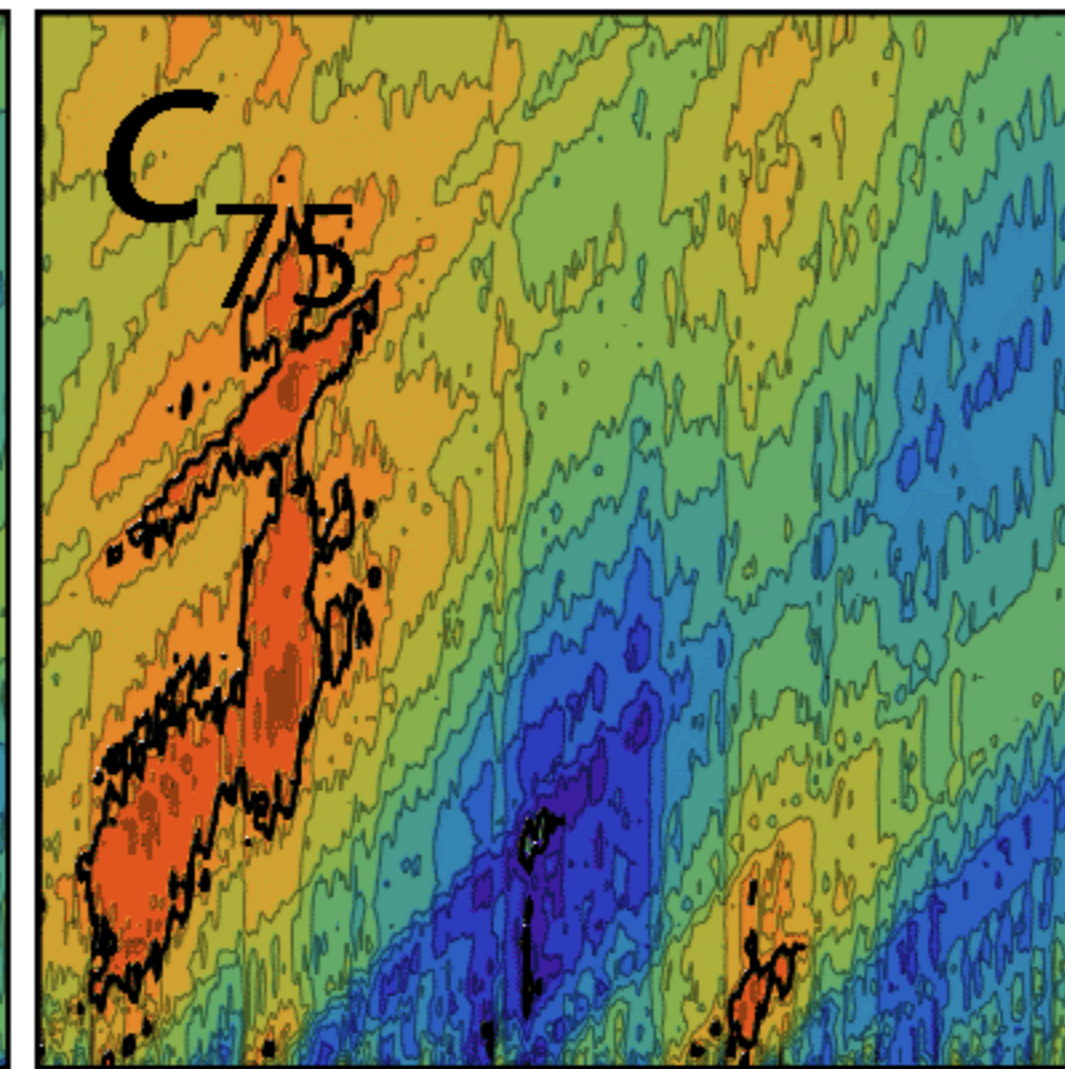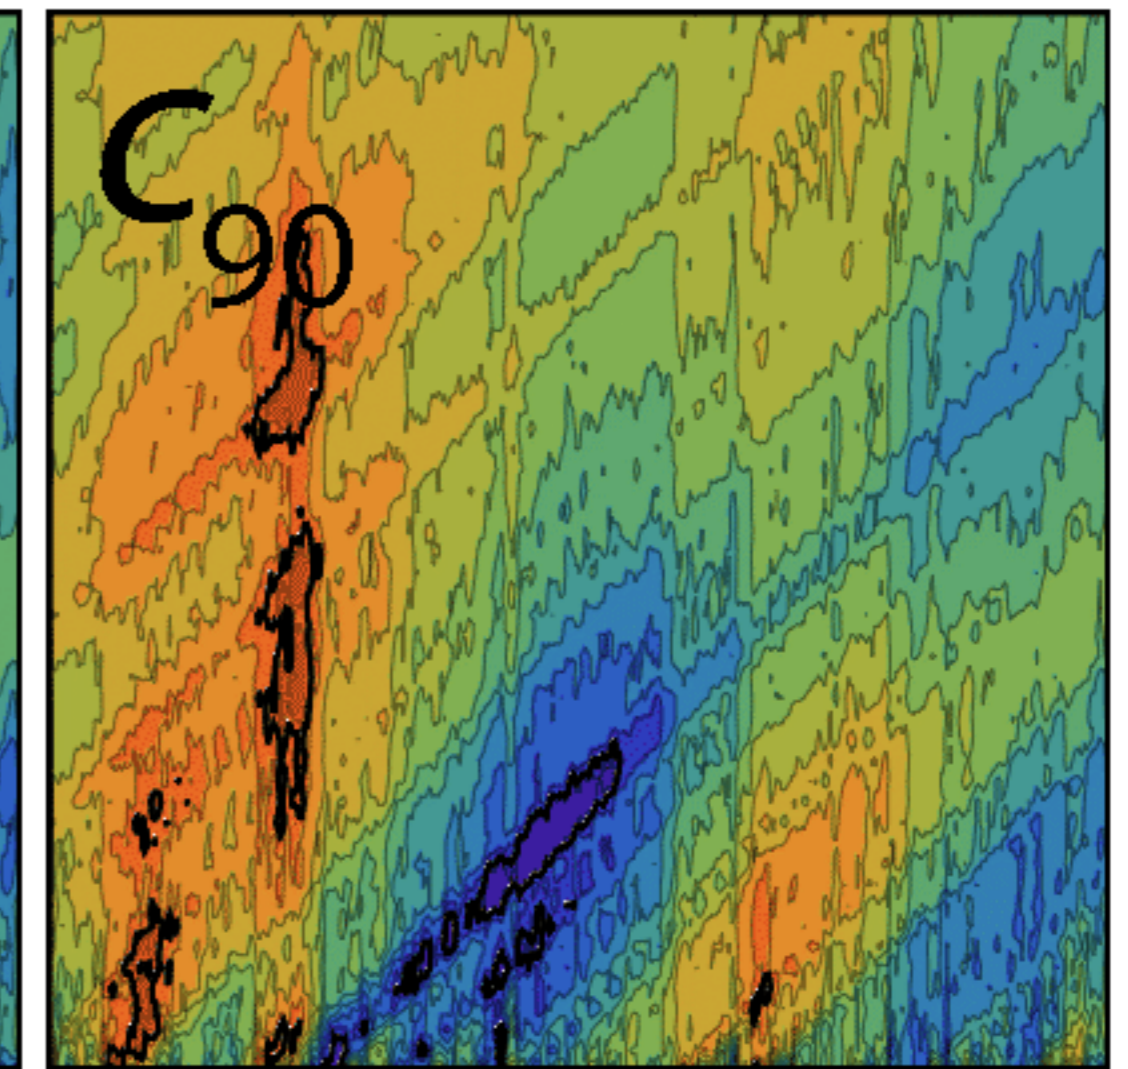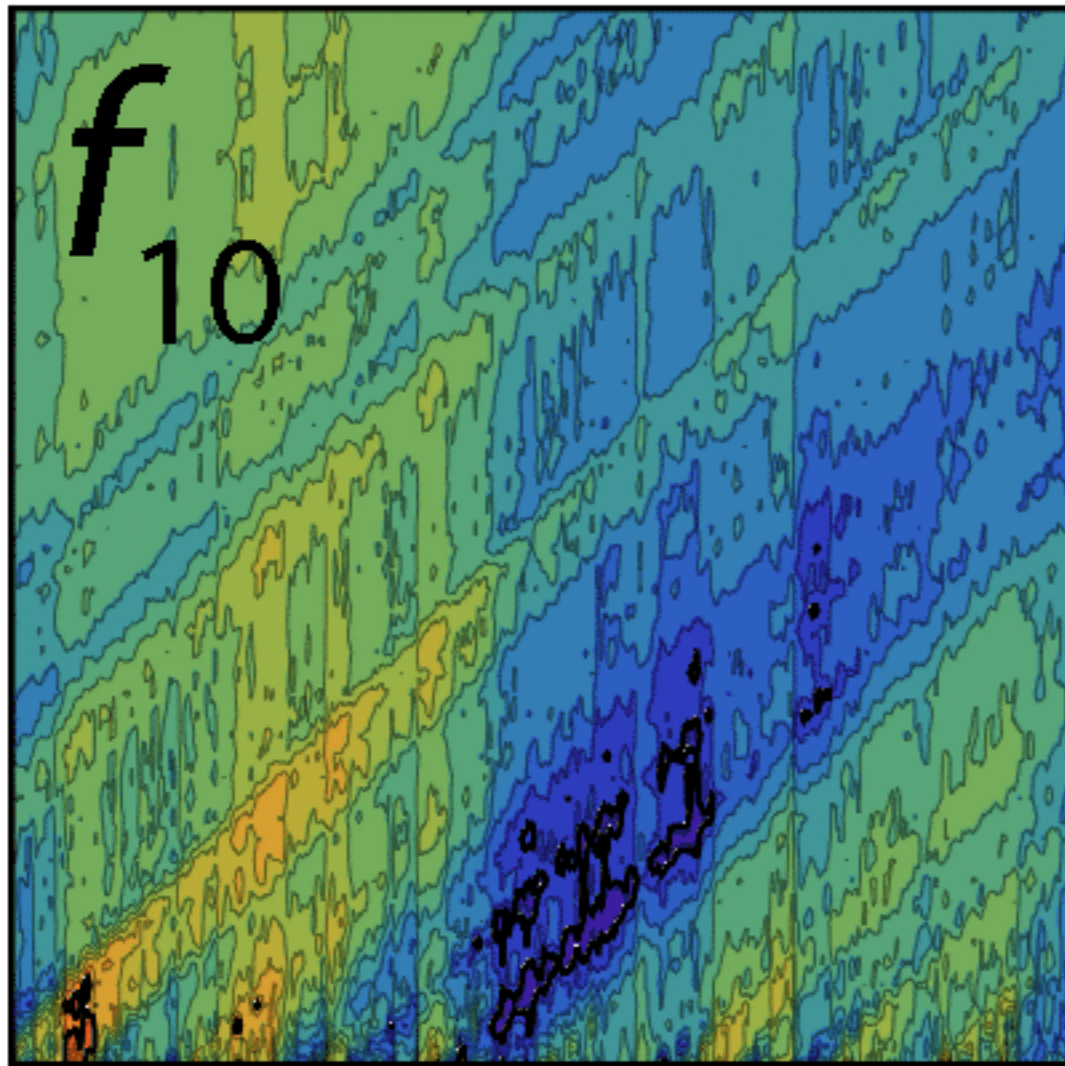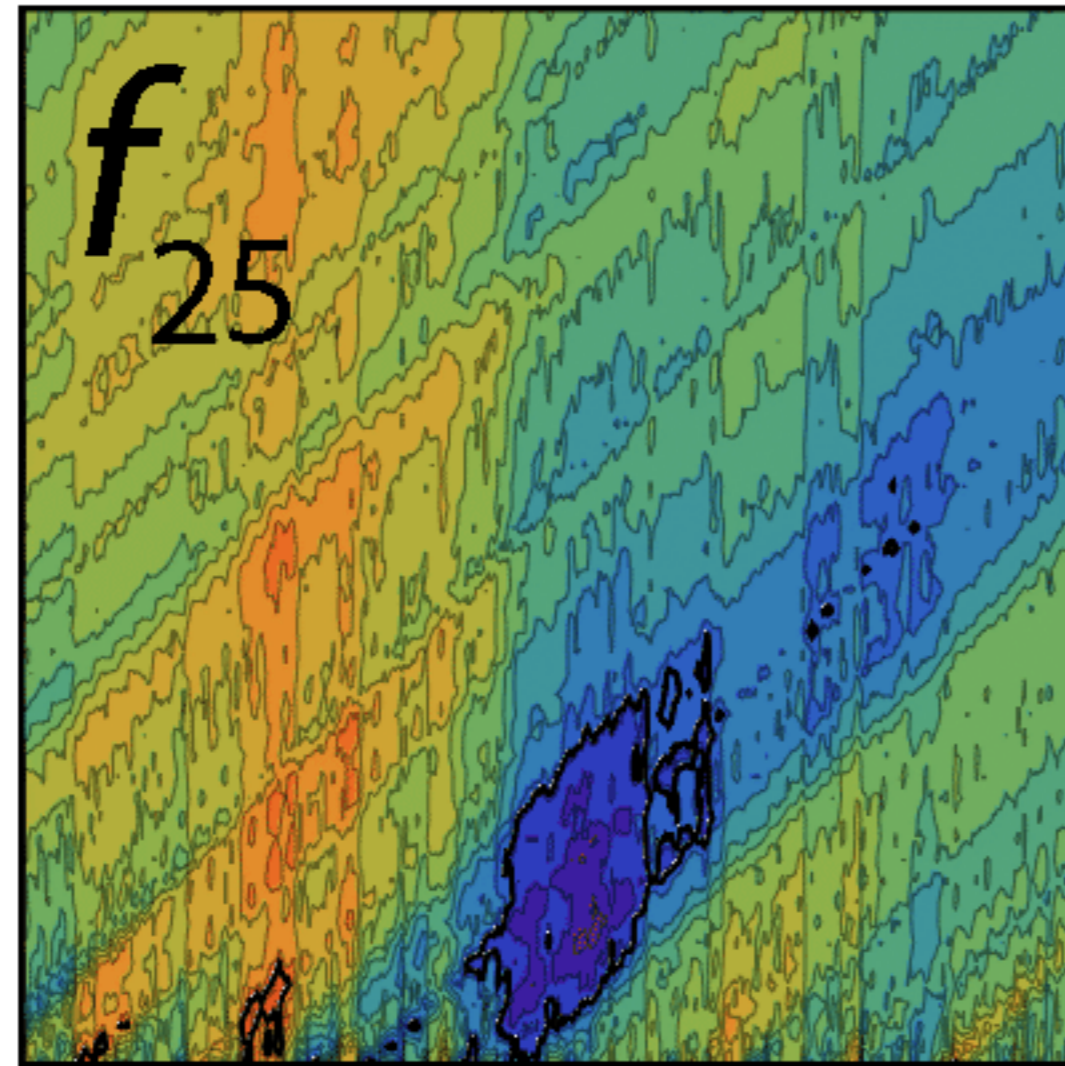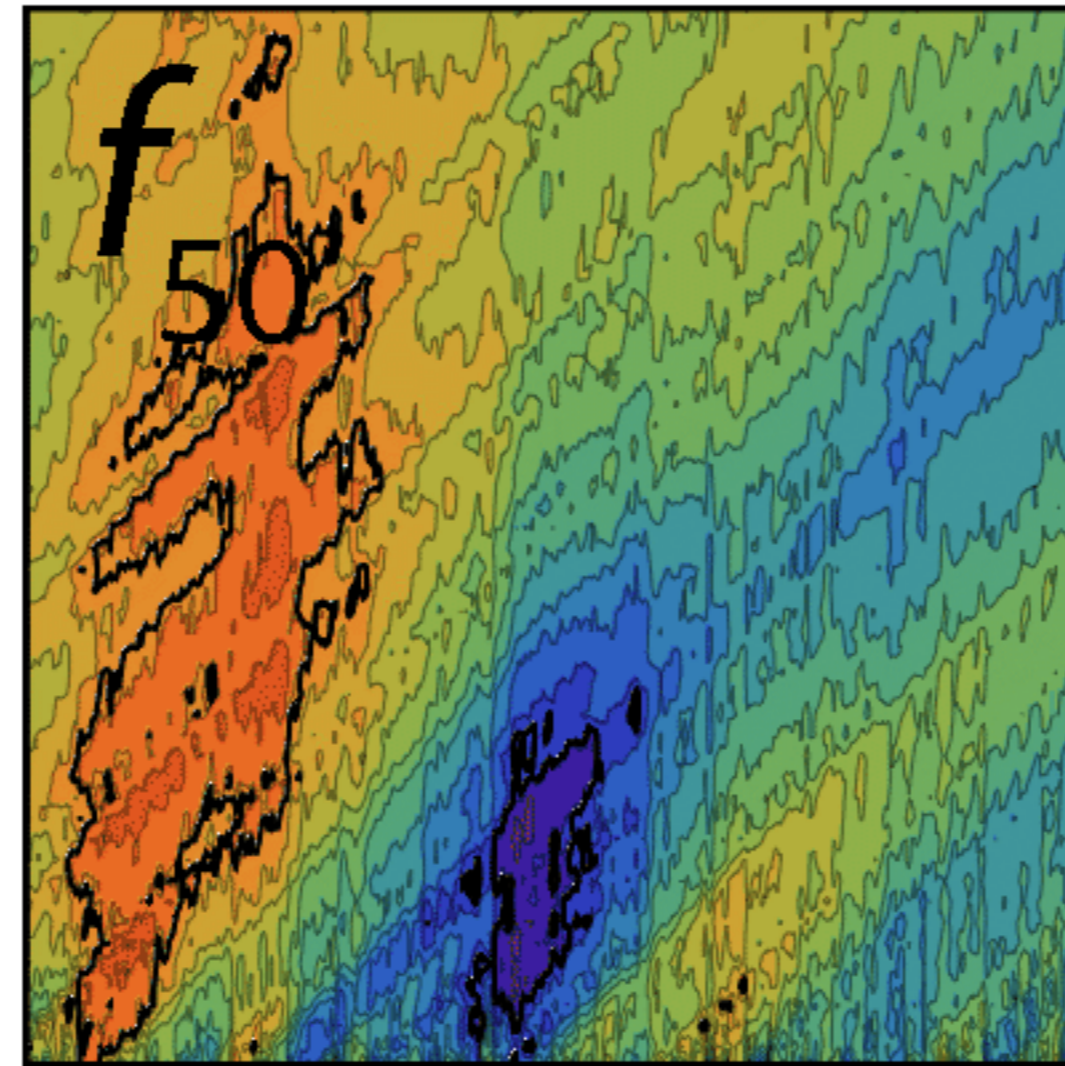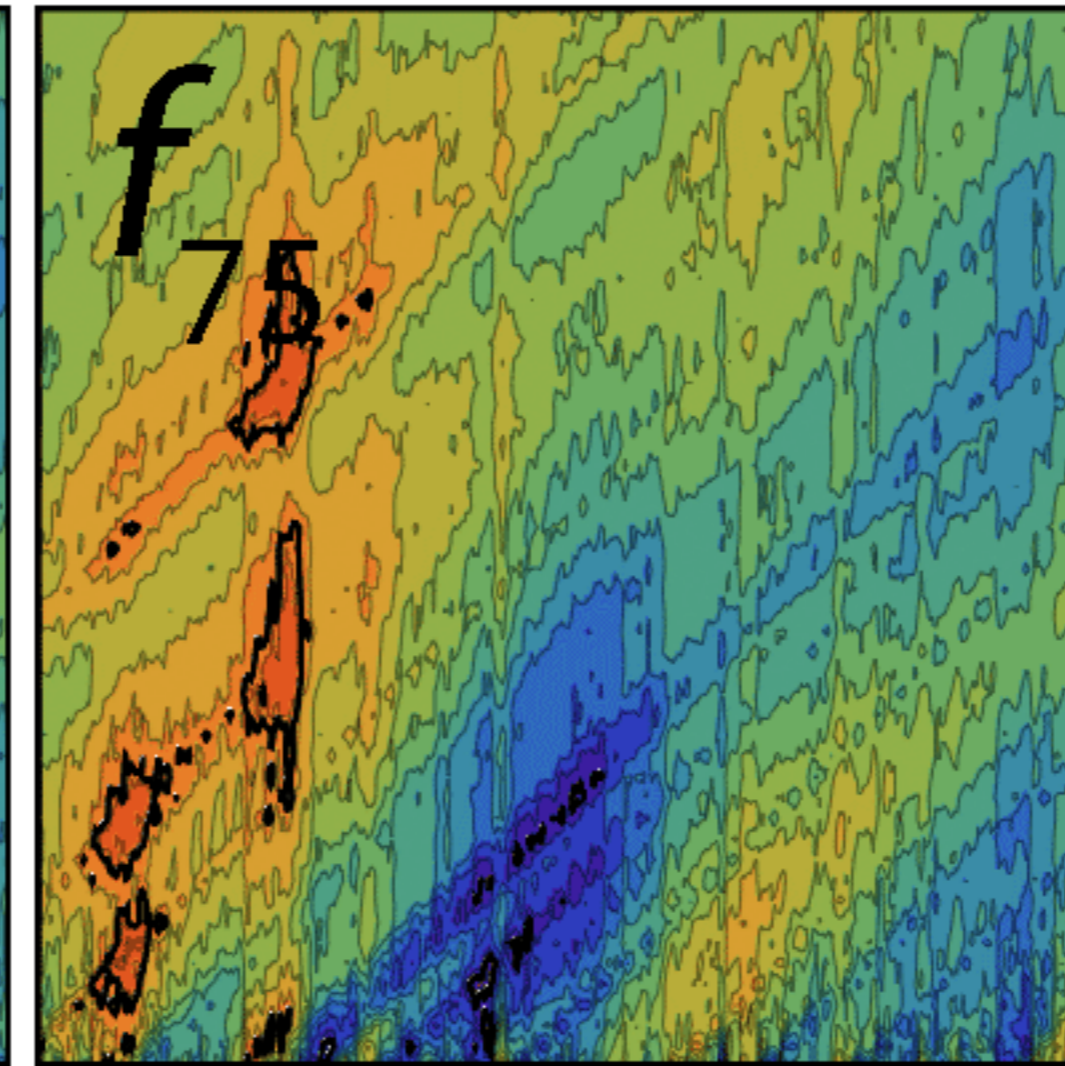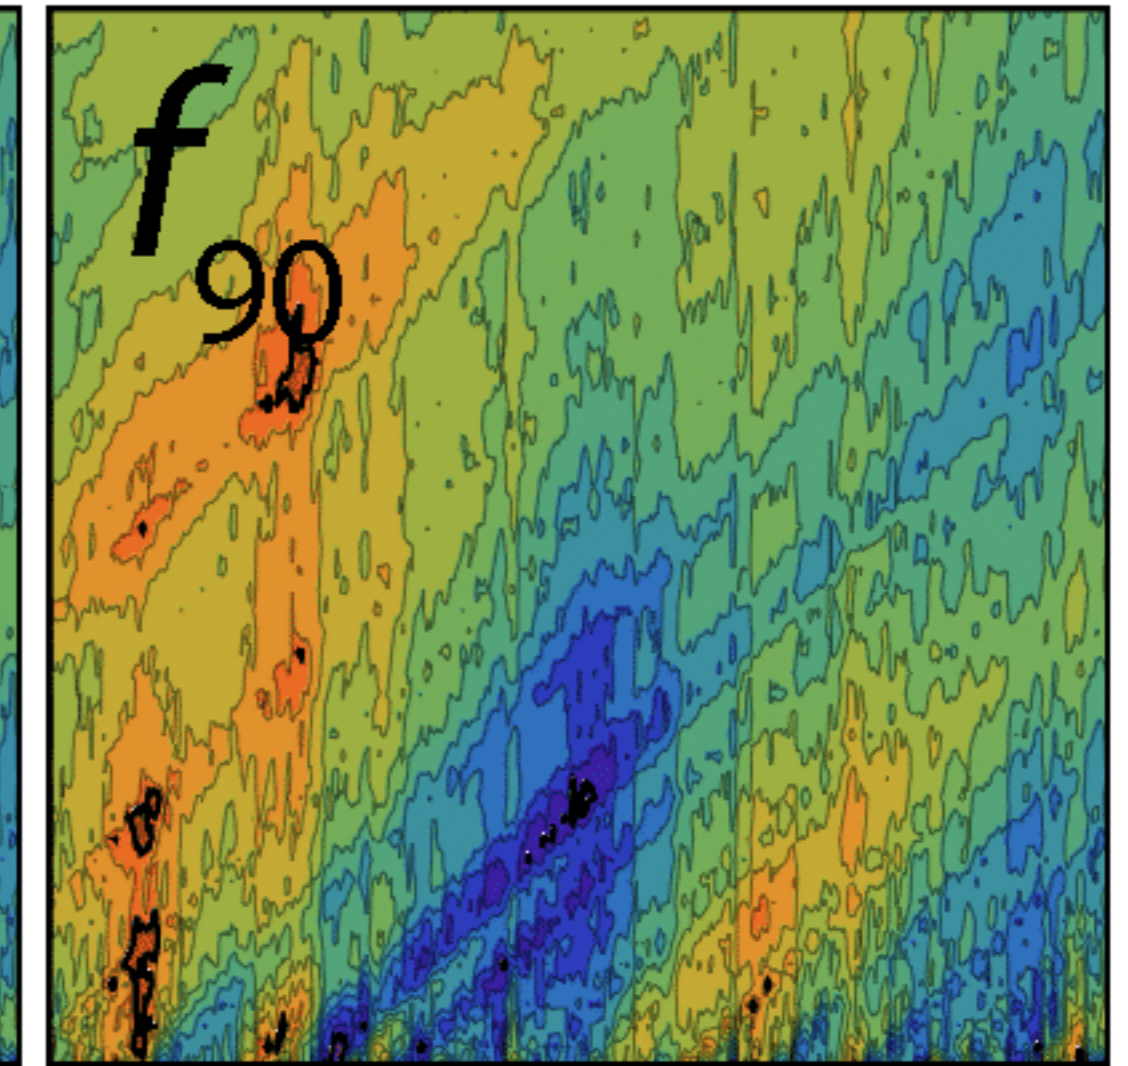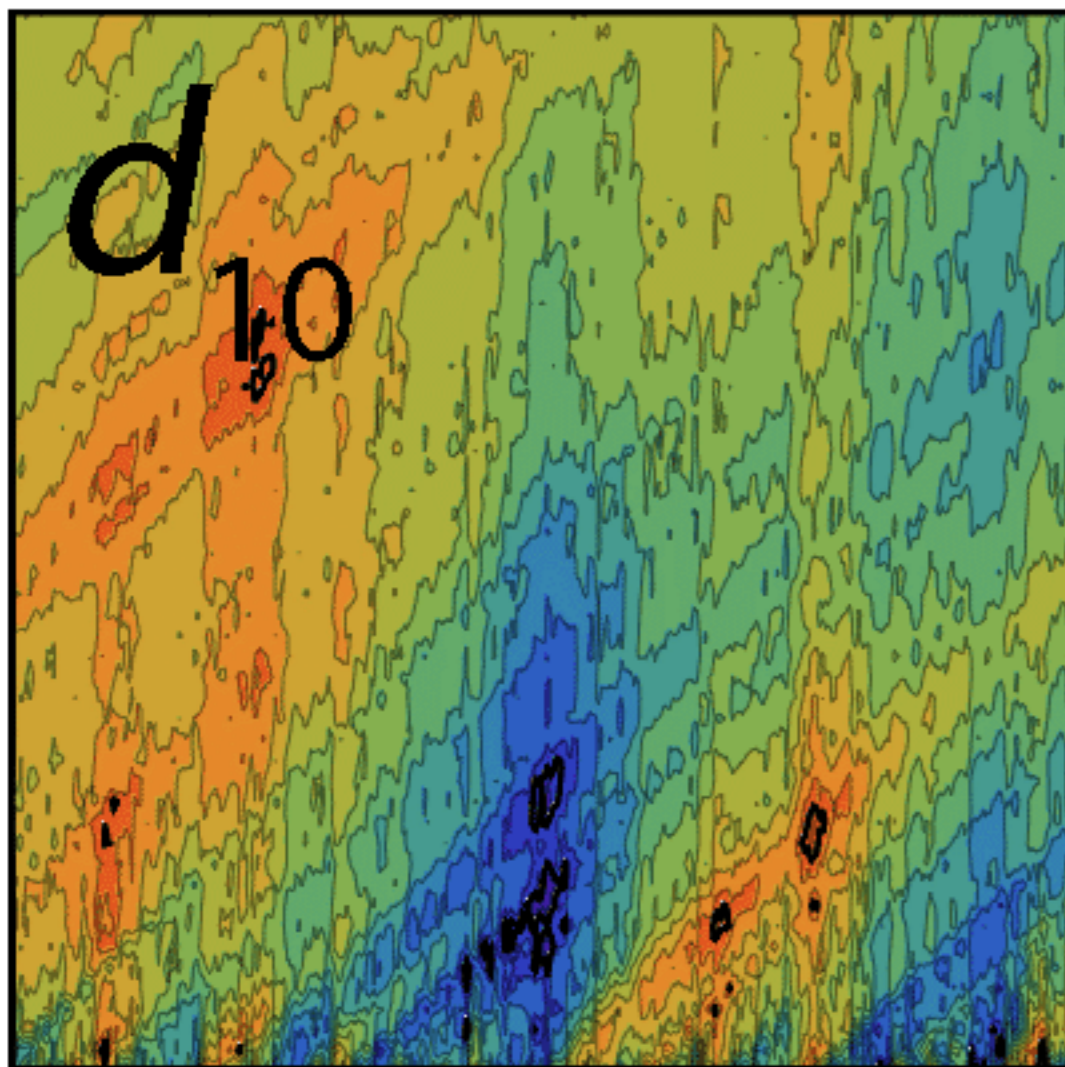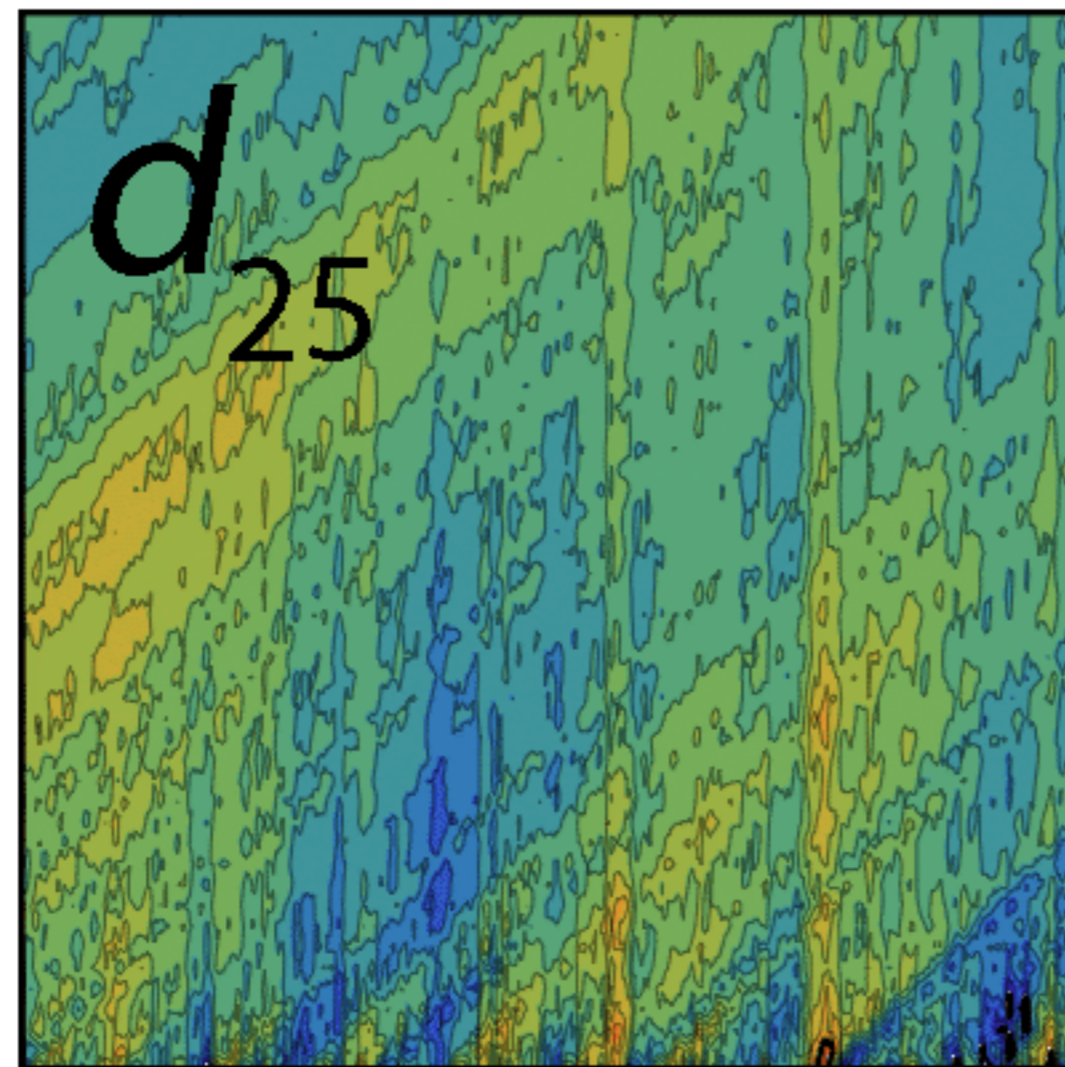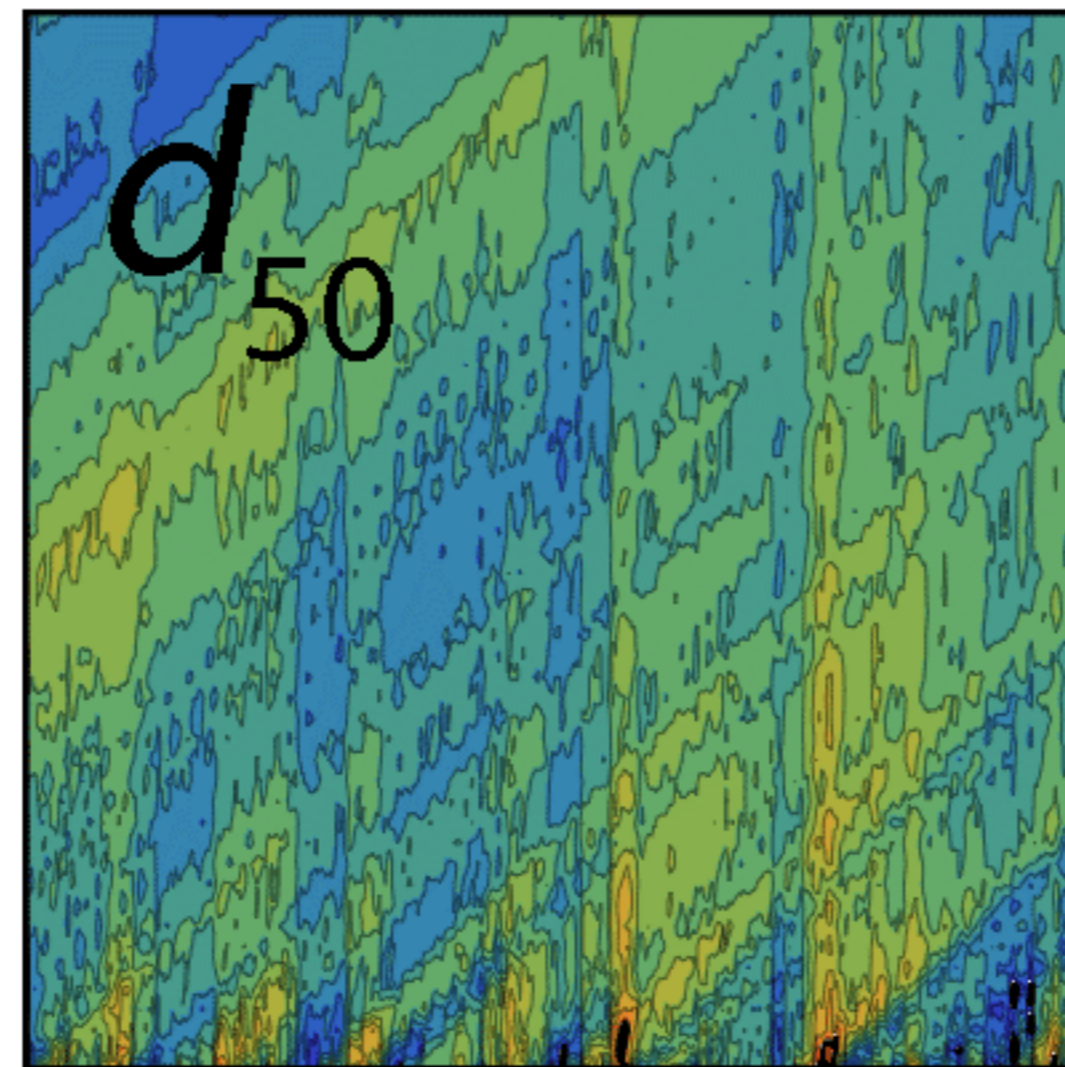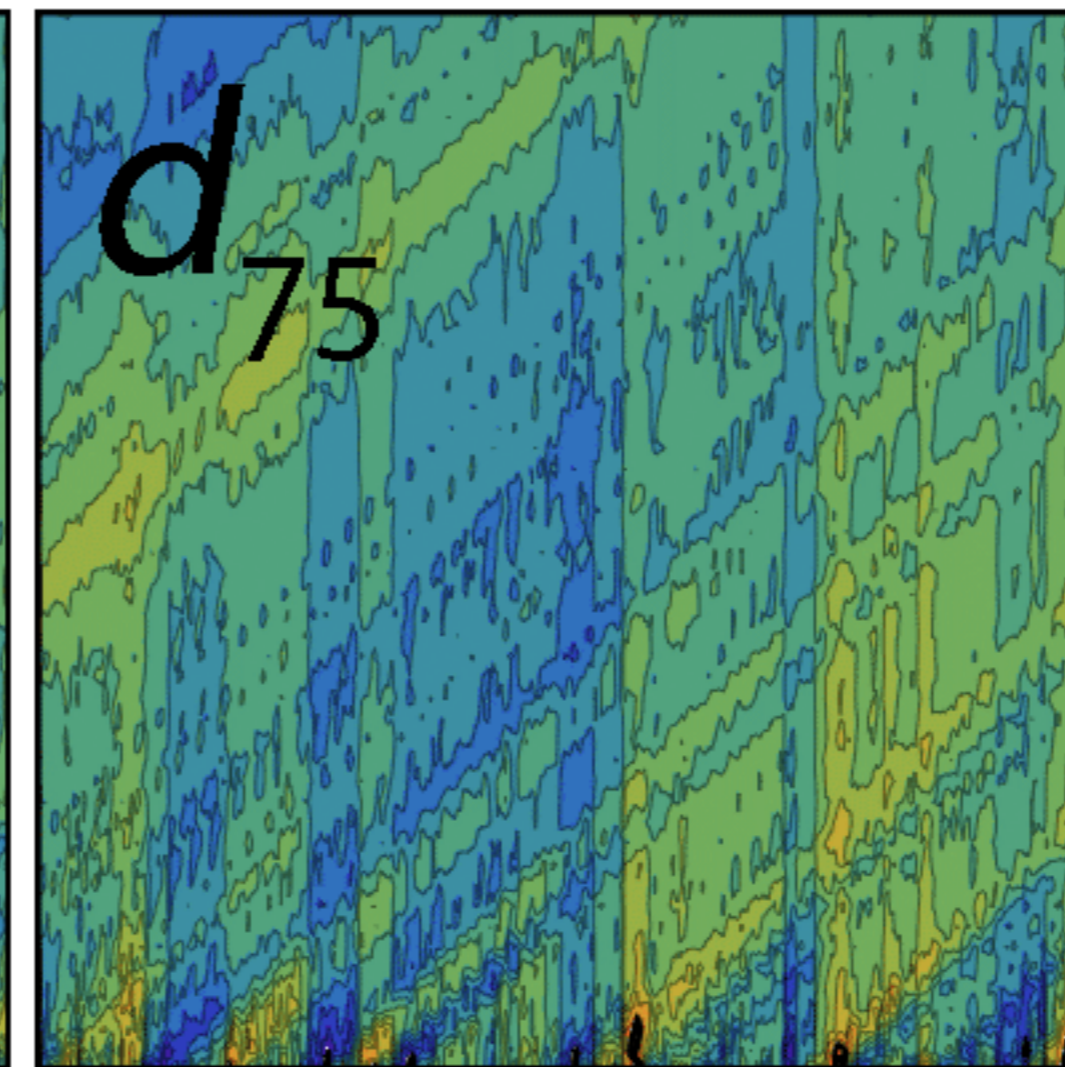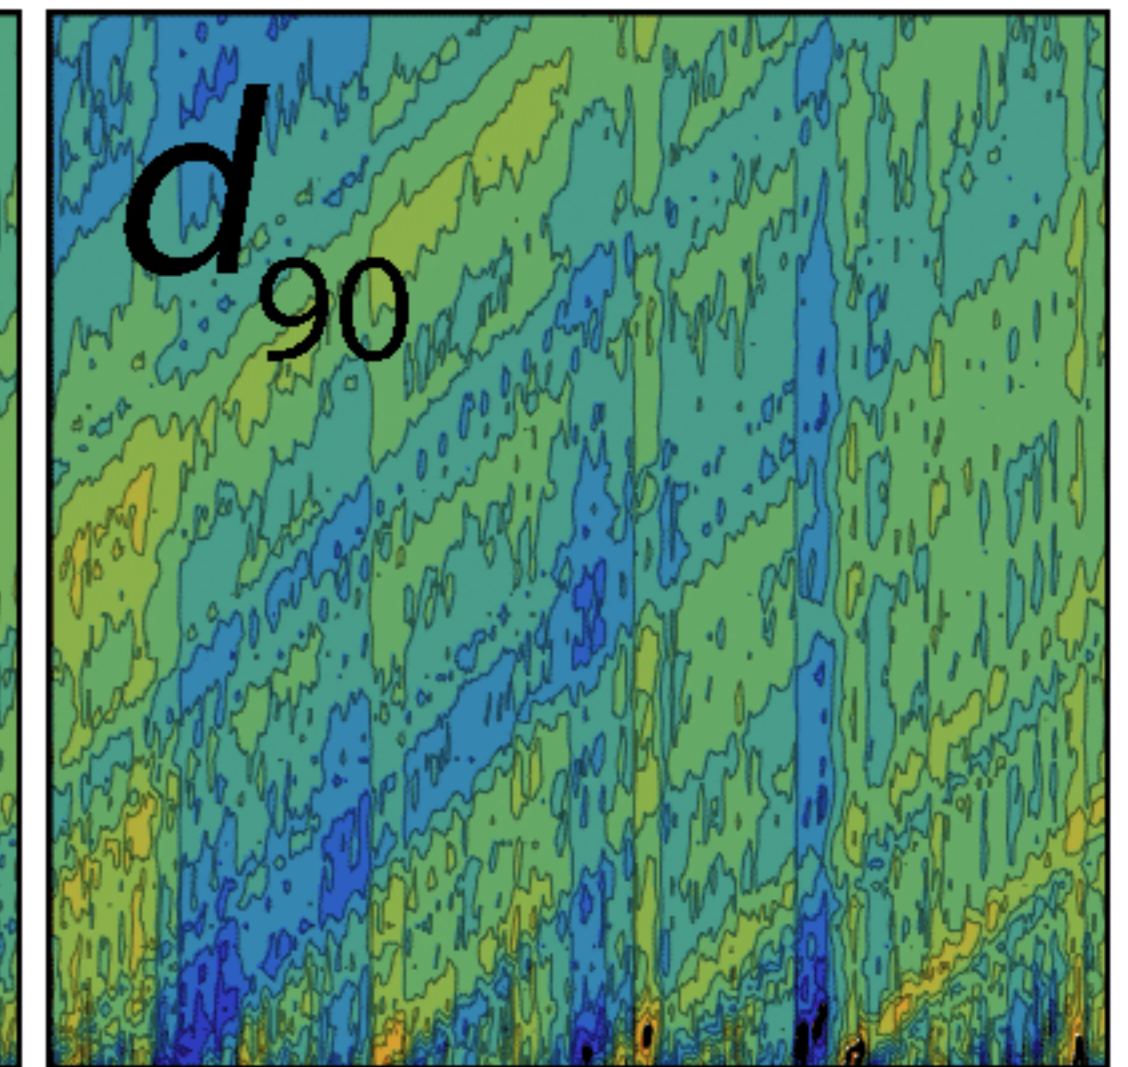

# *Quercus rubra*

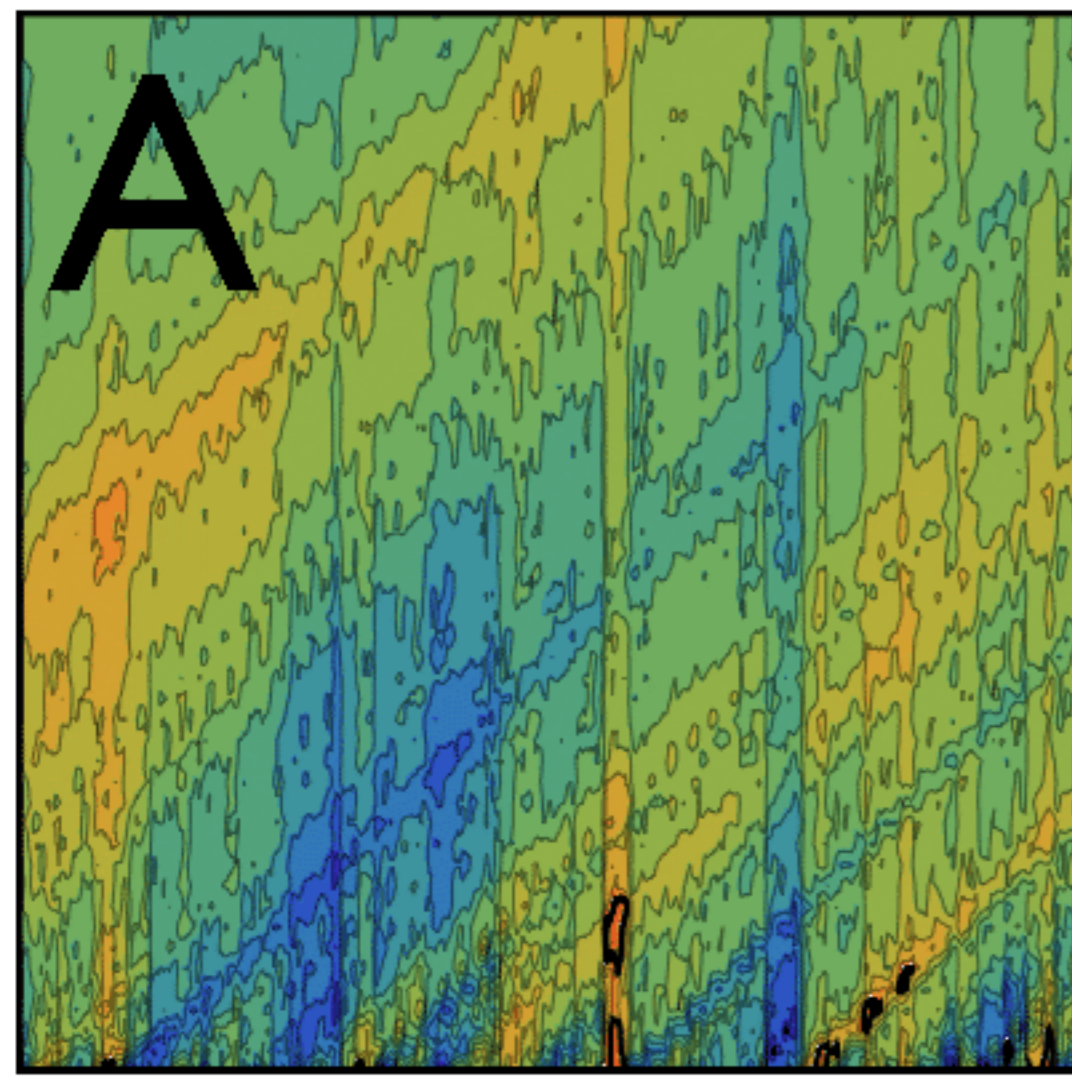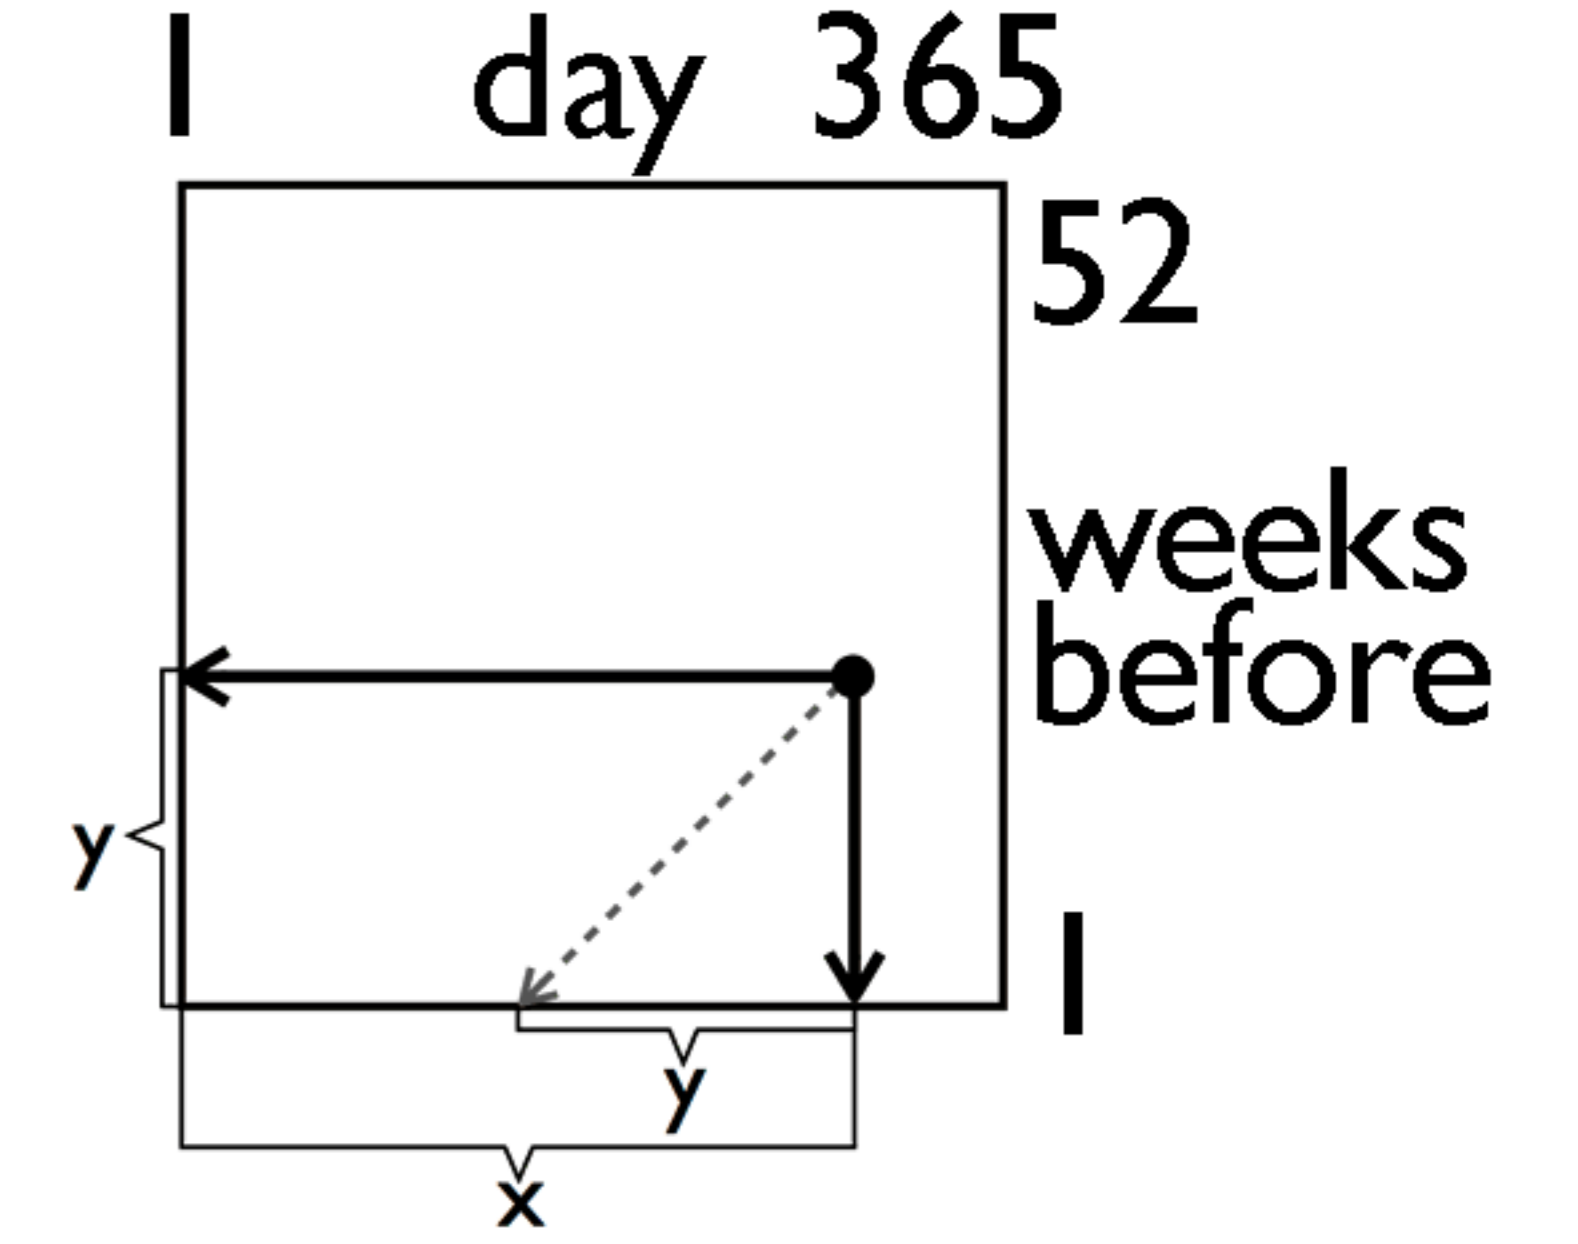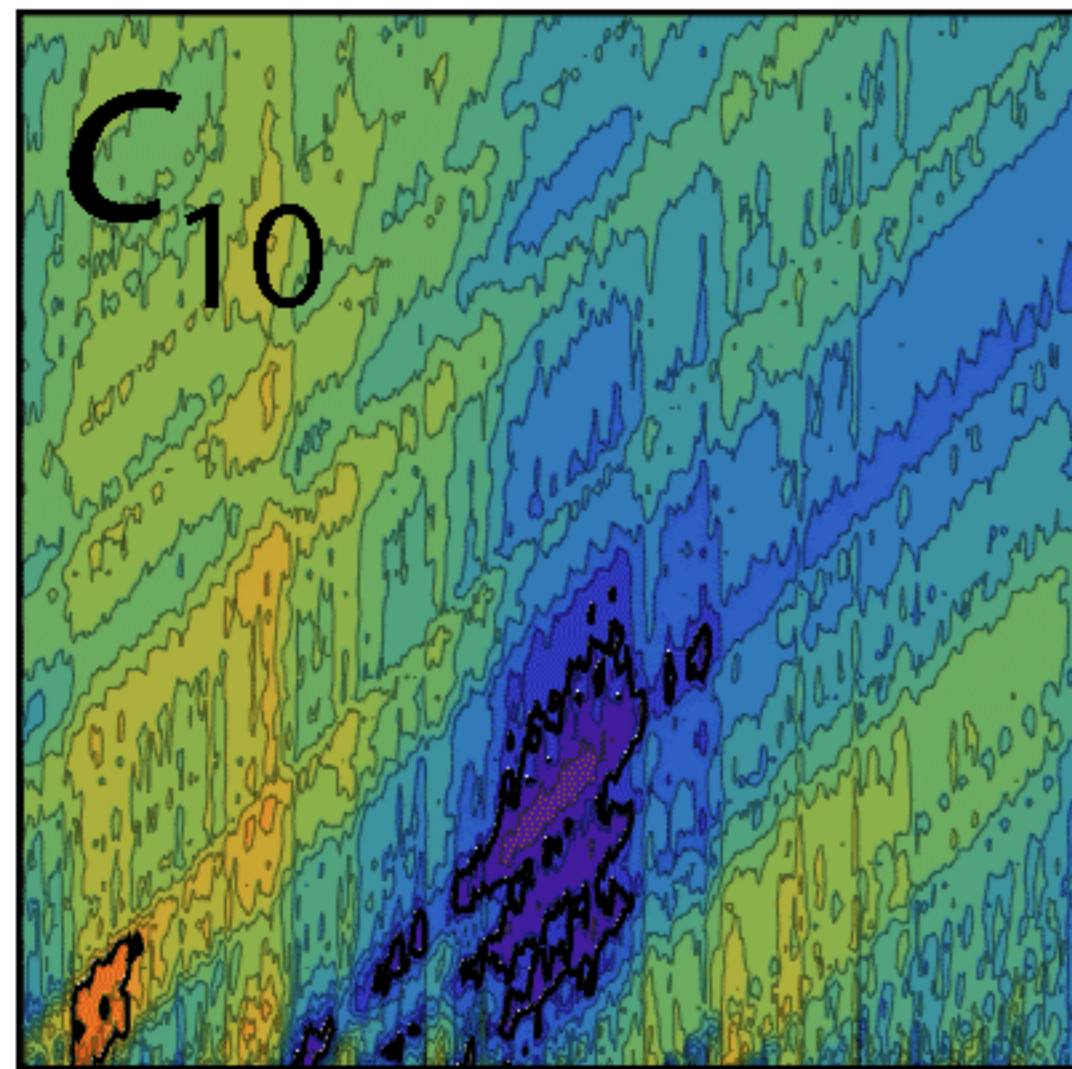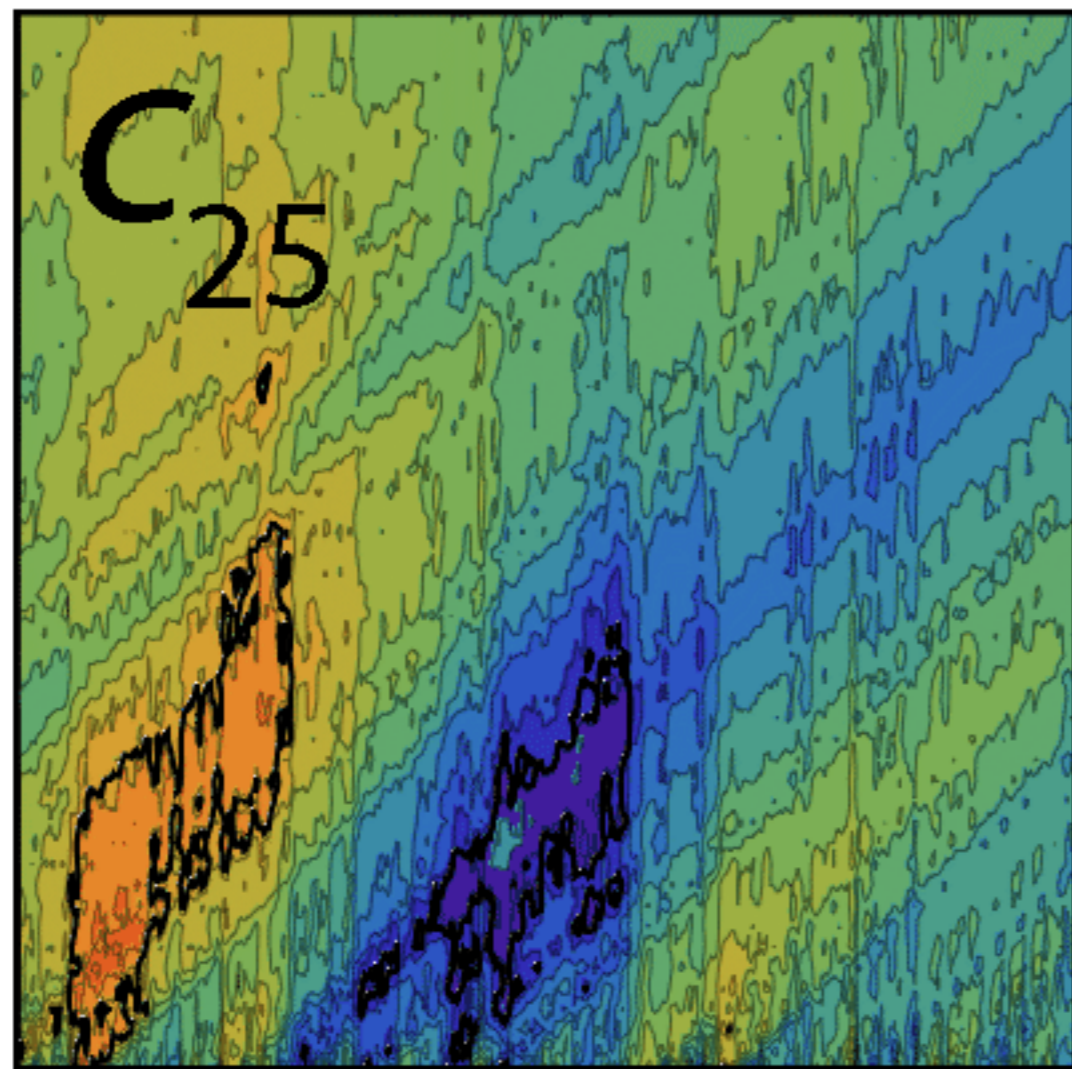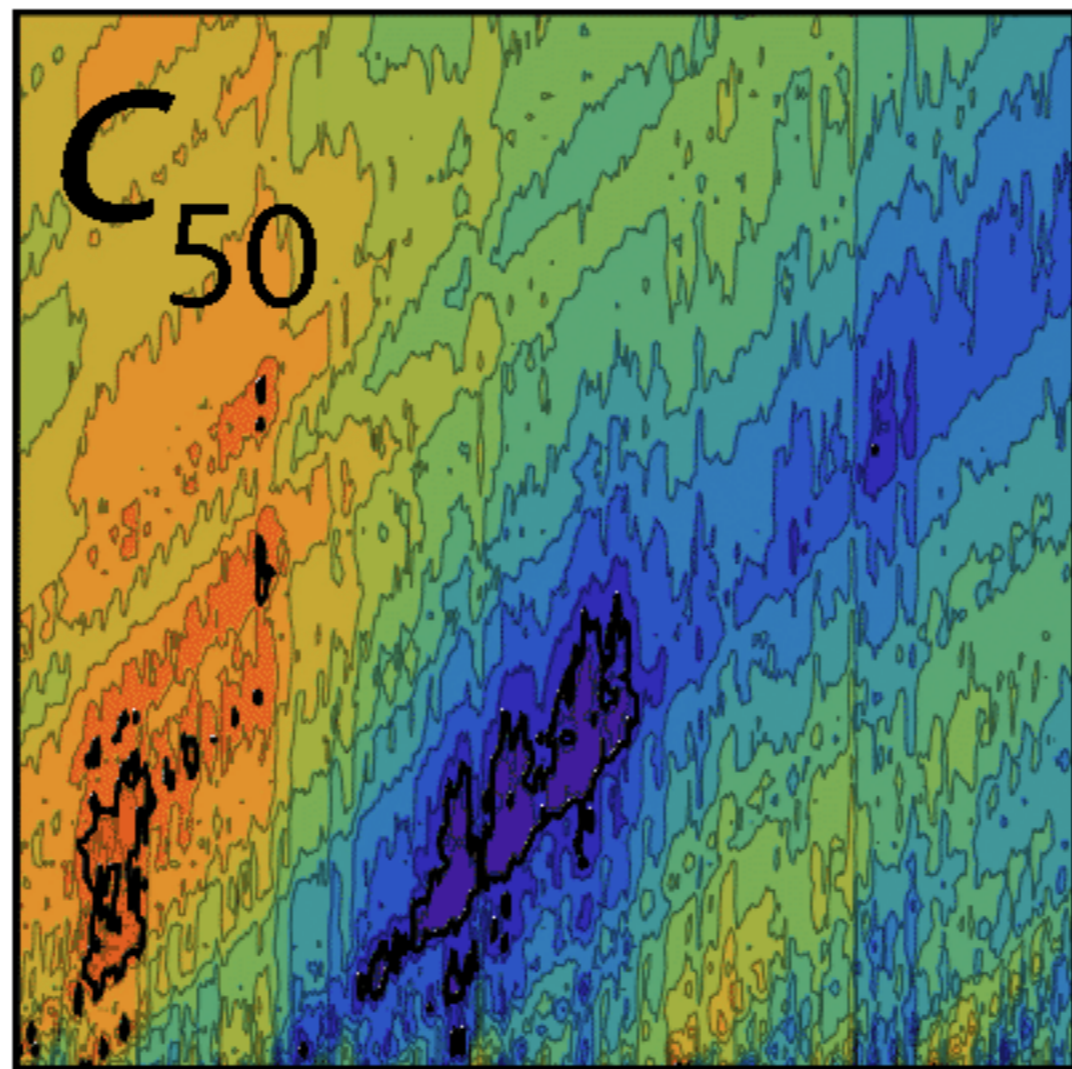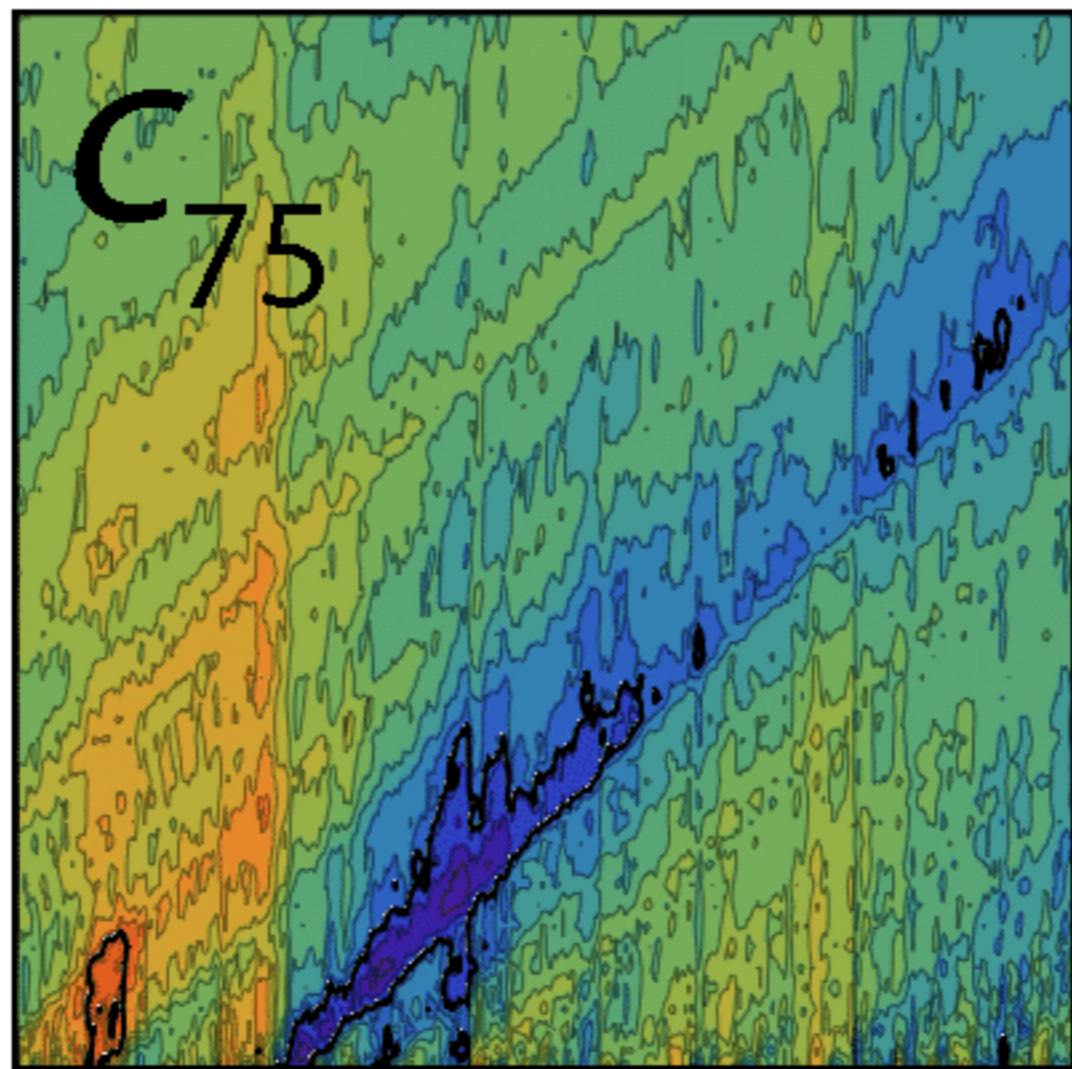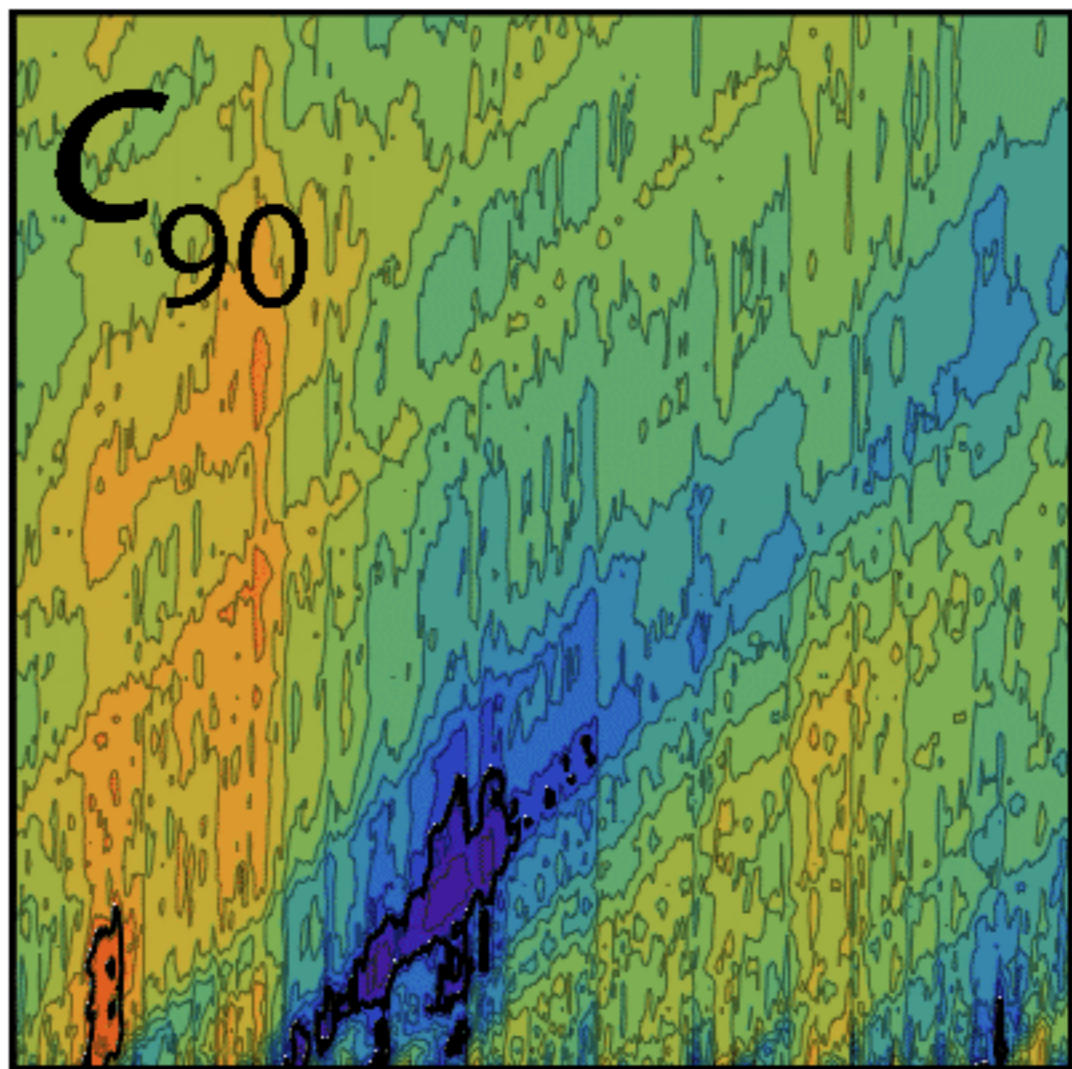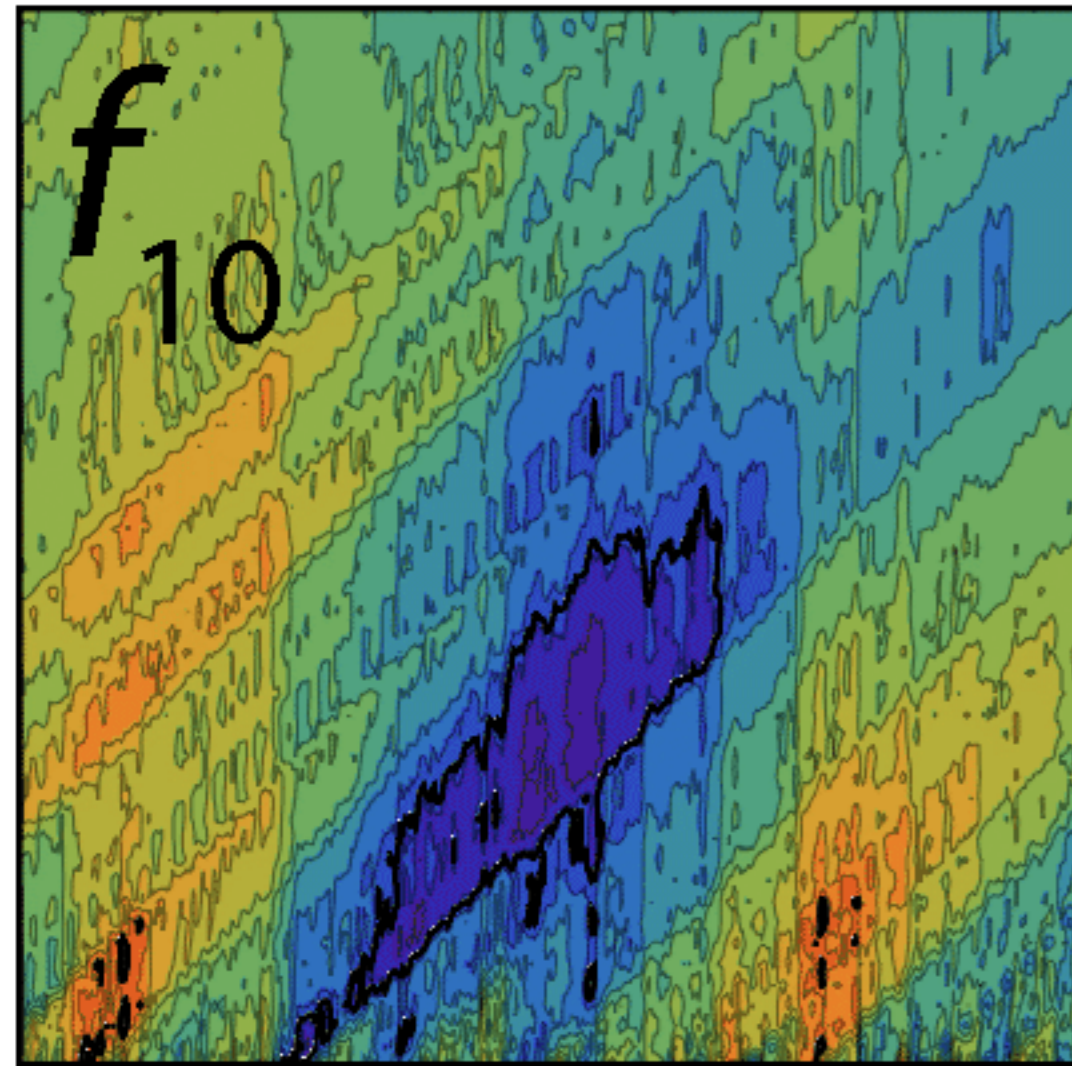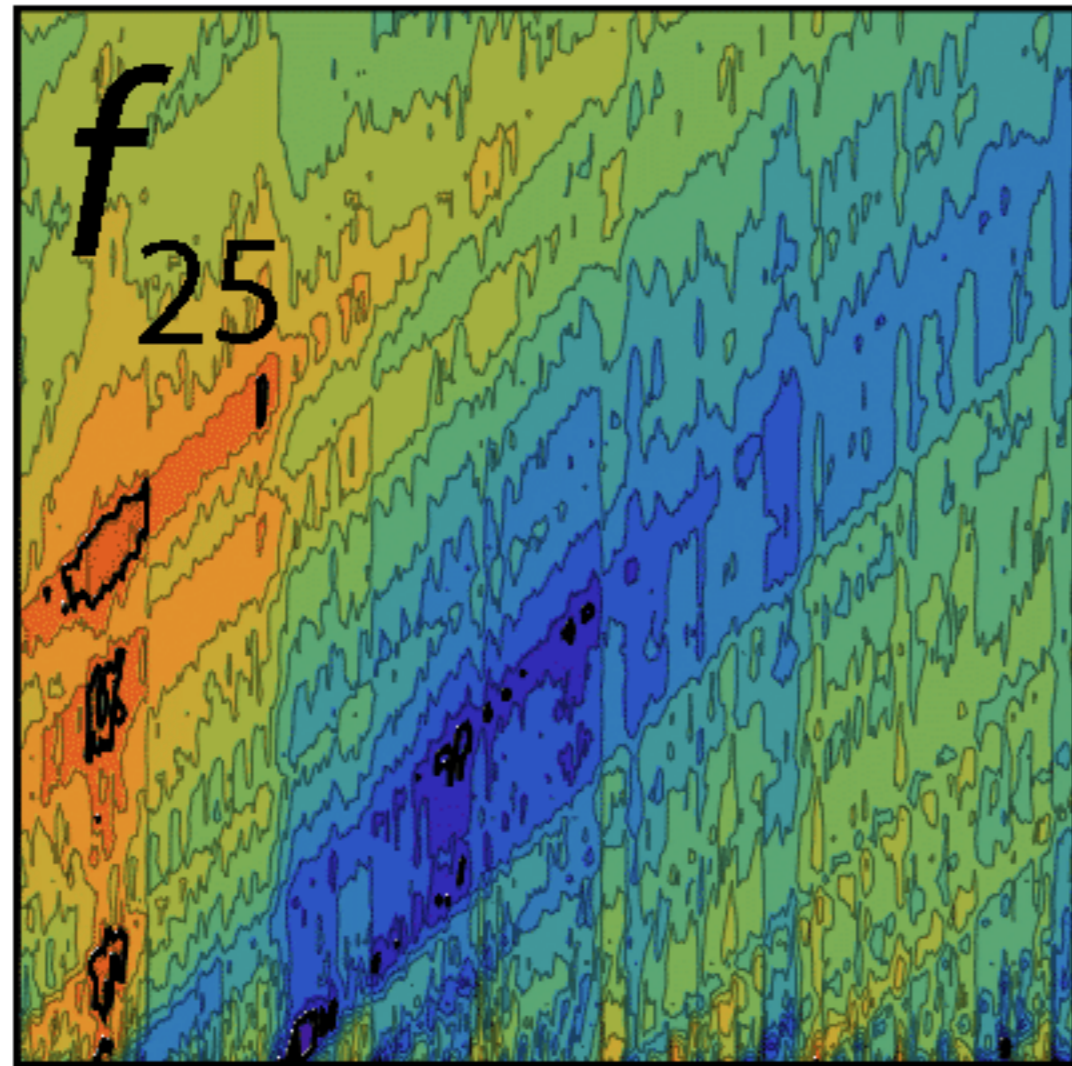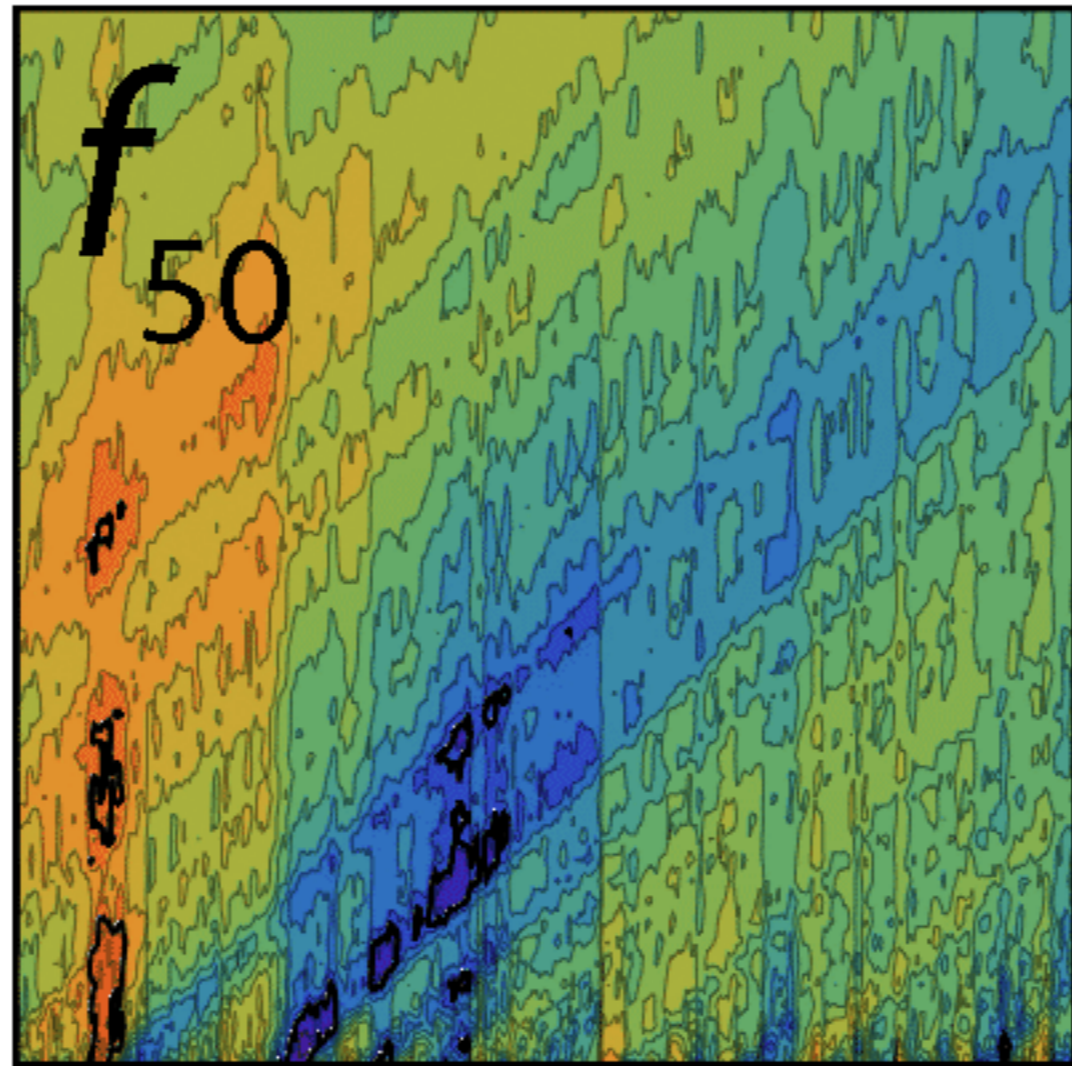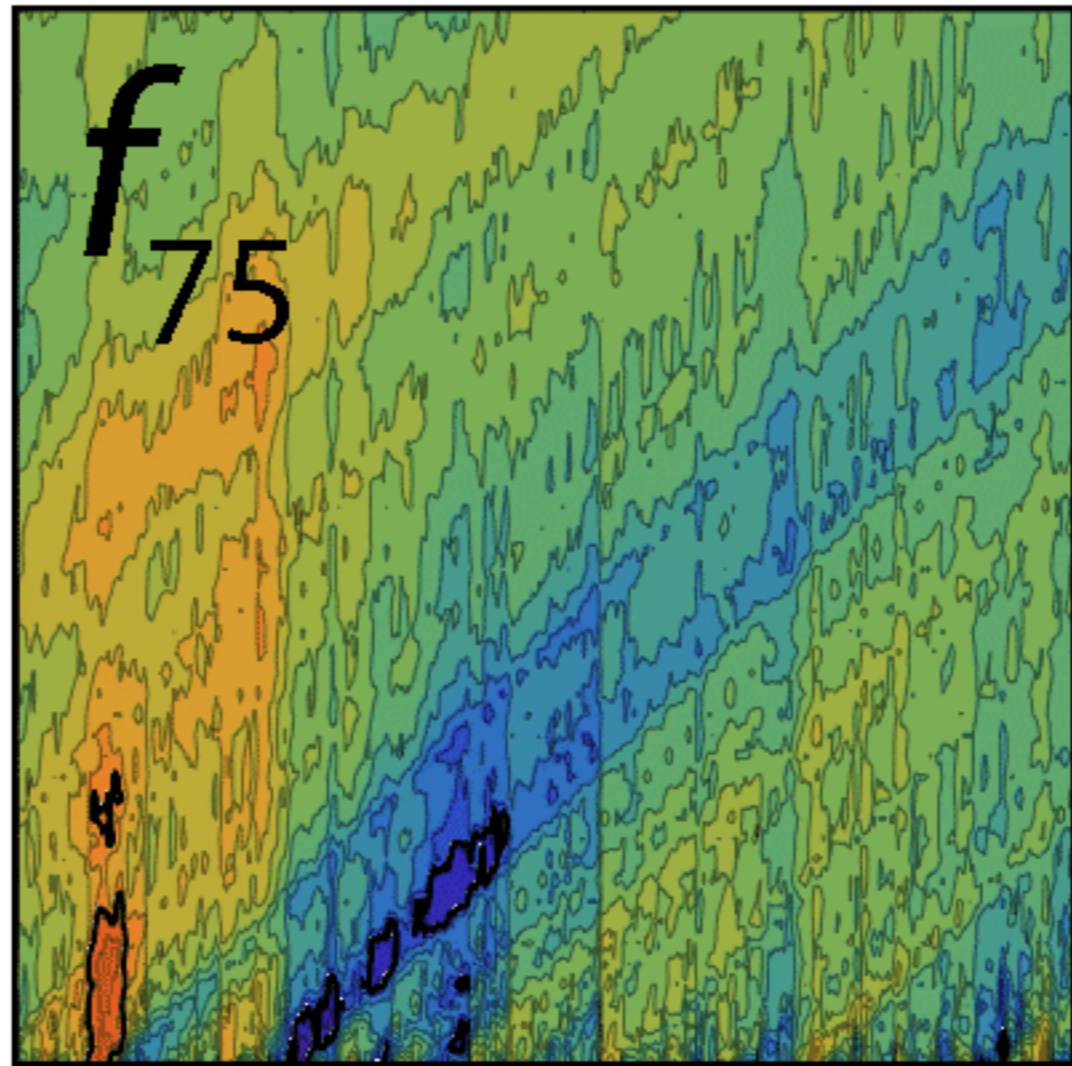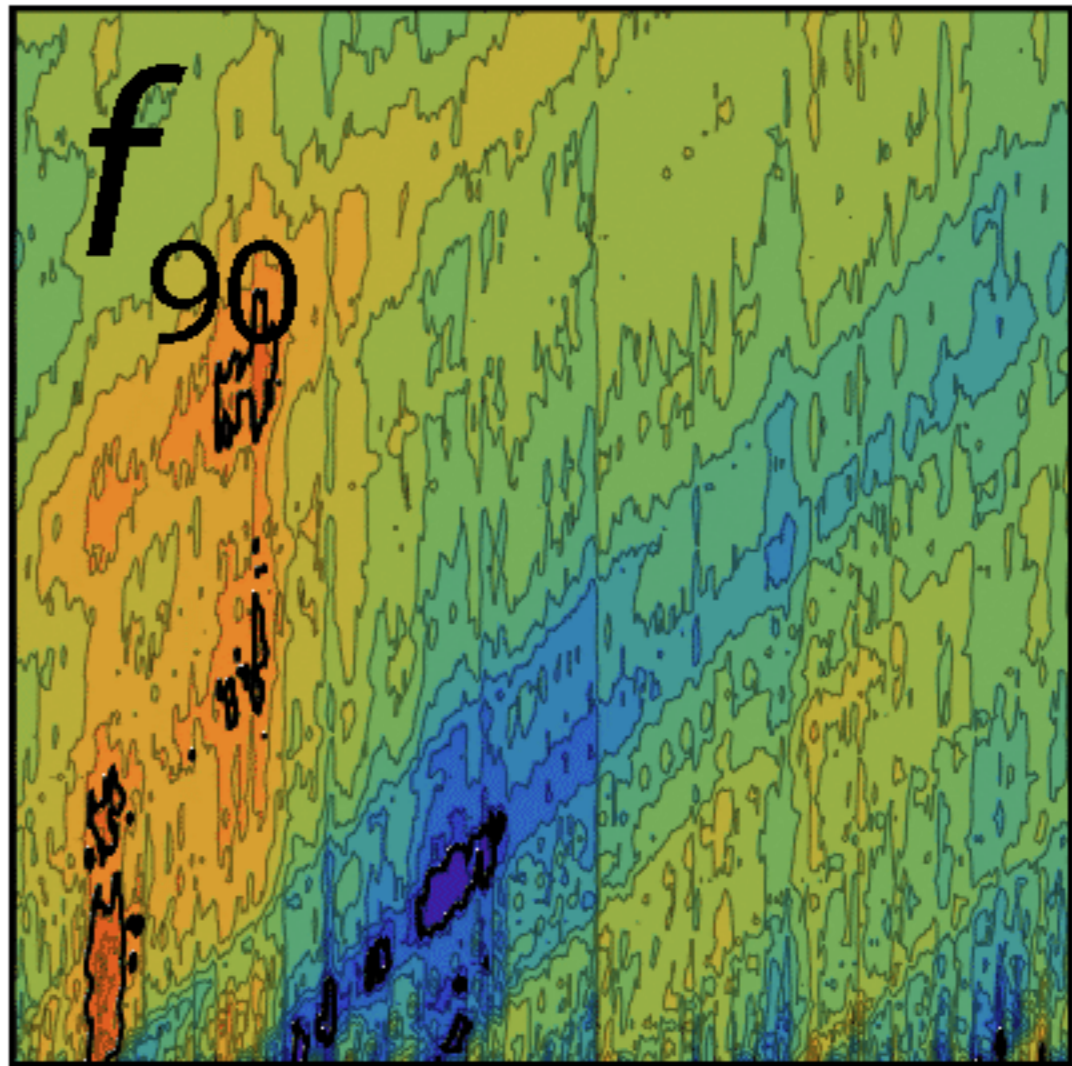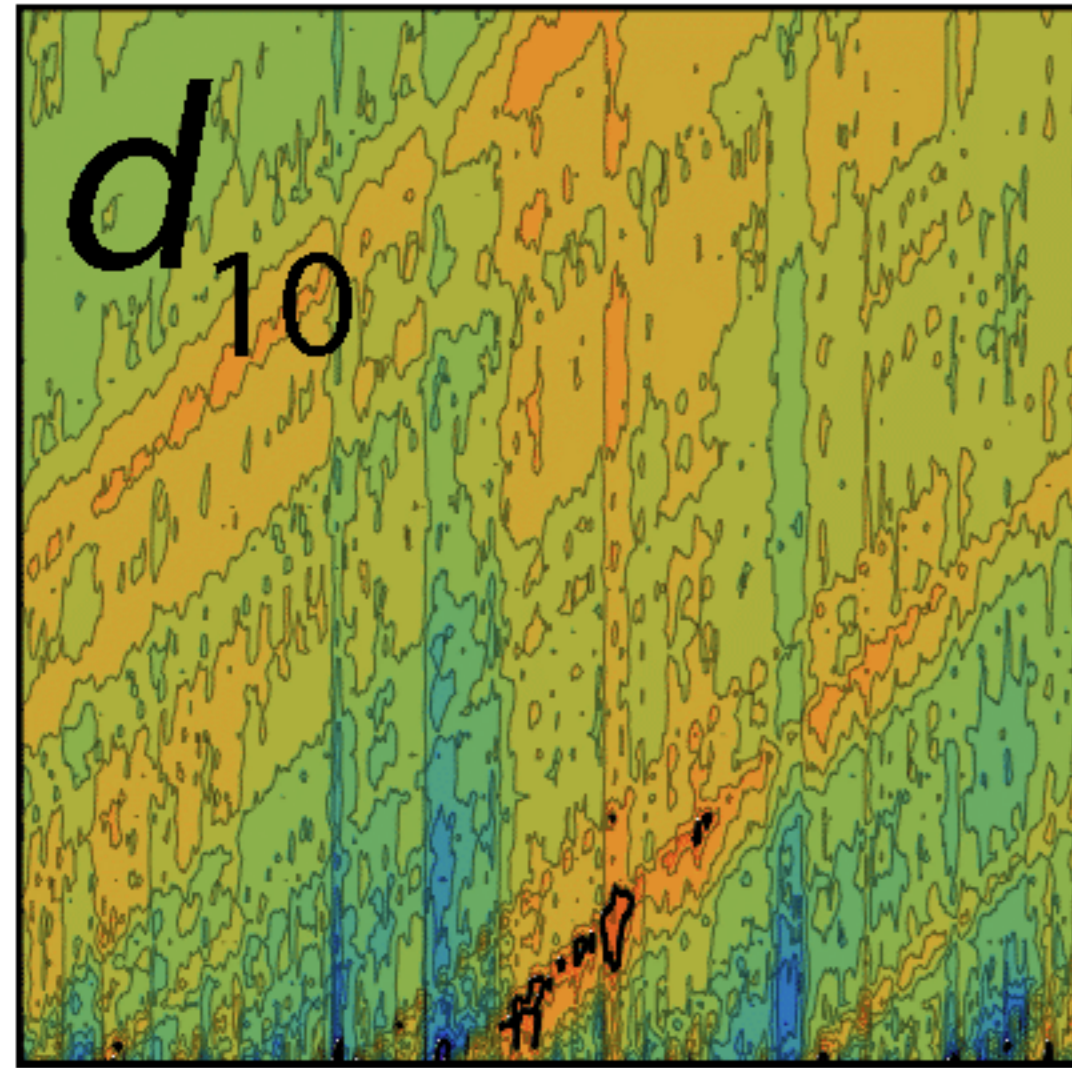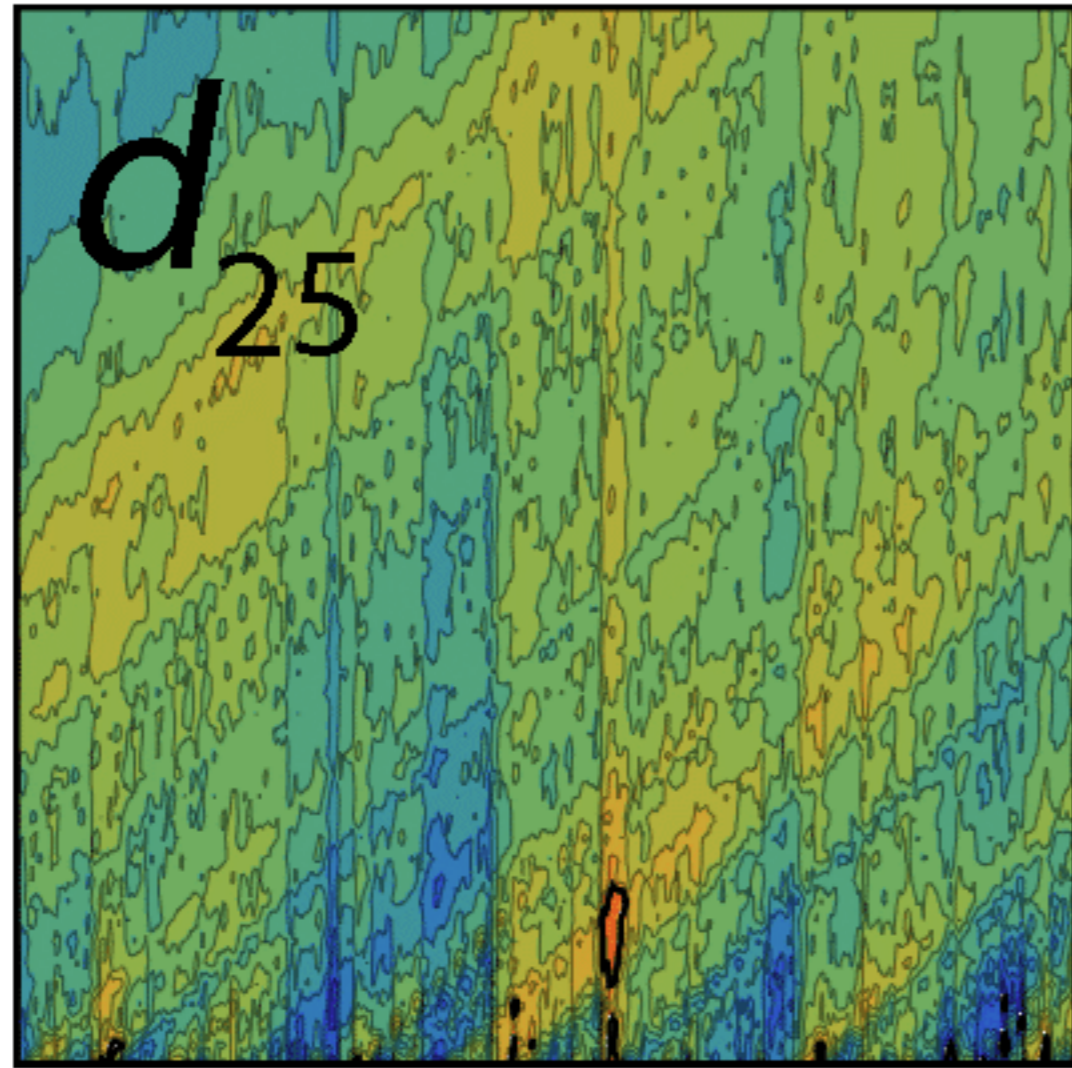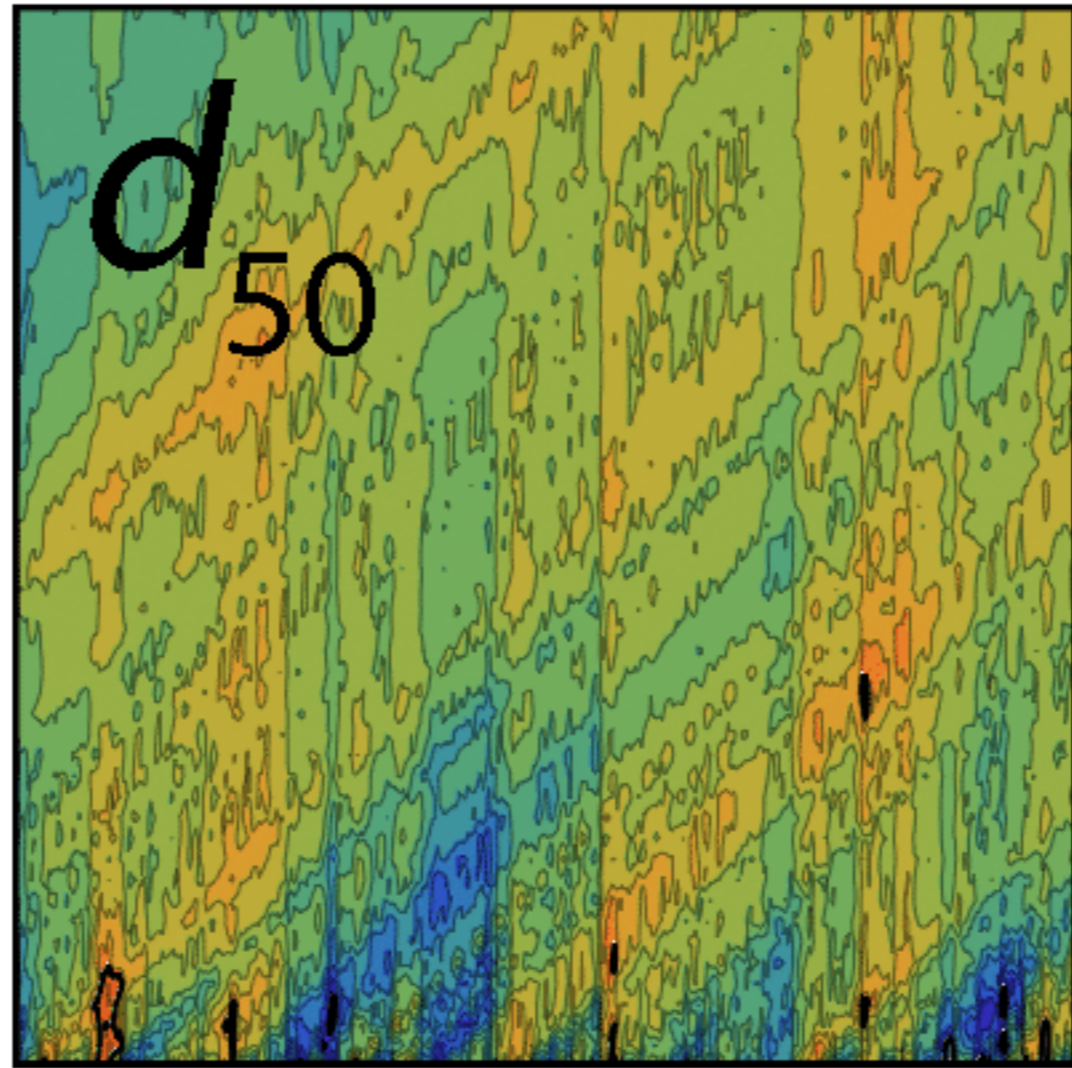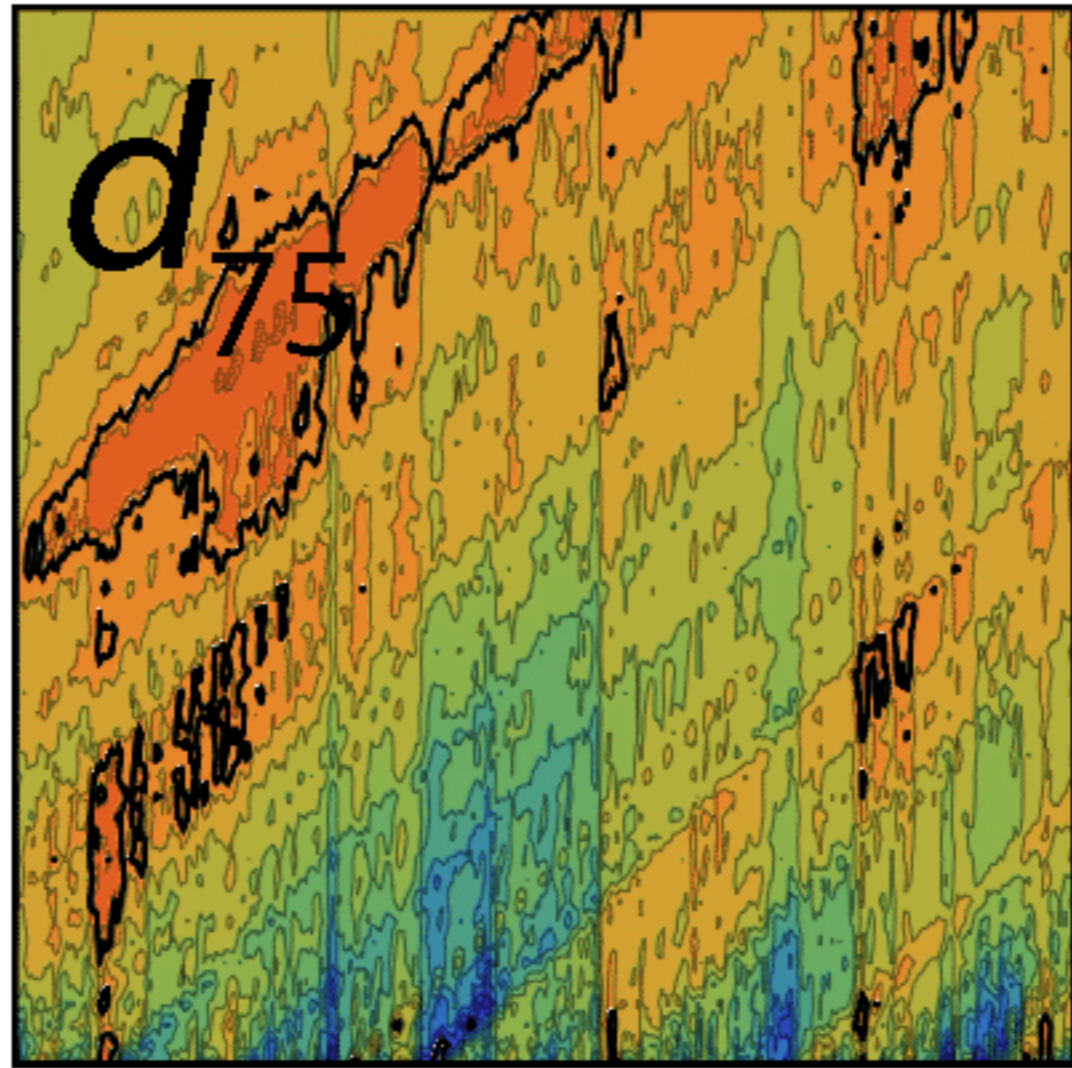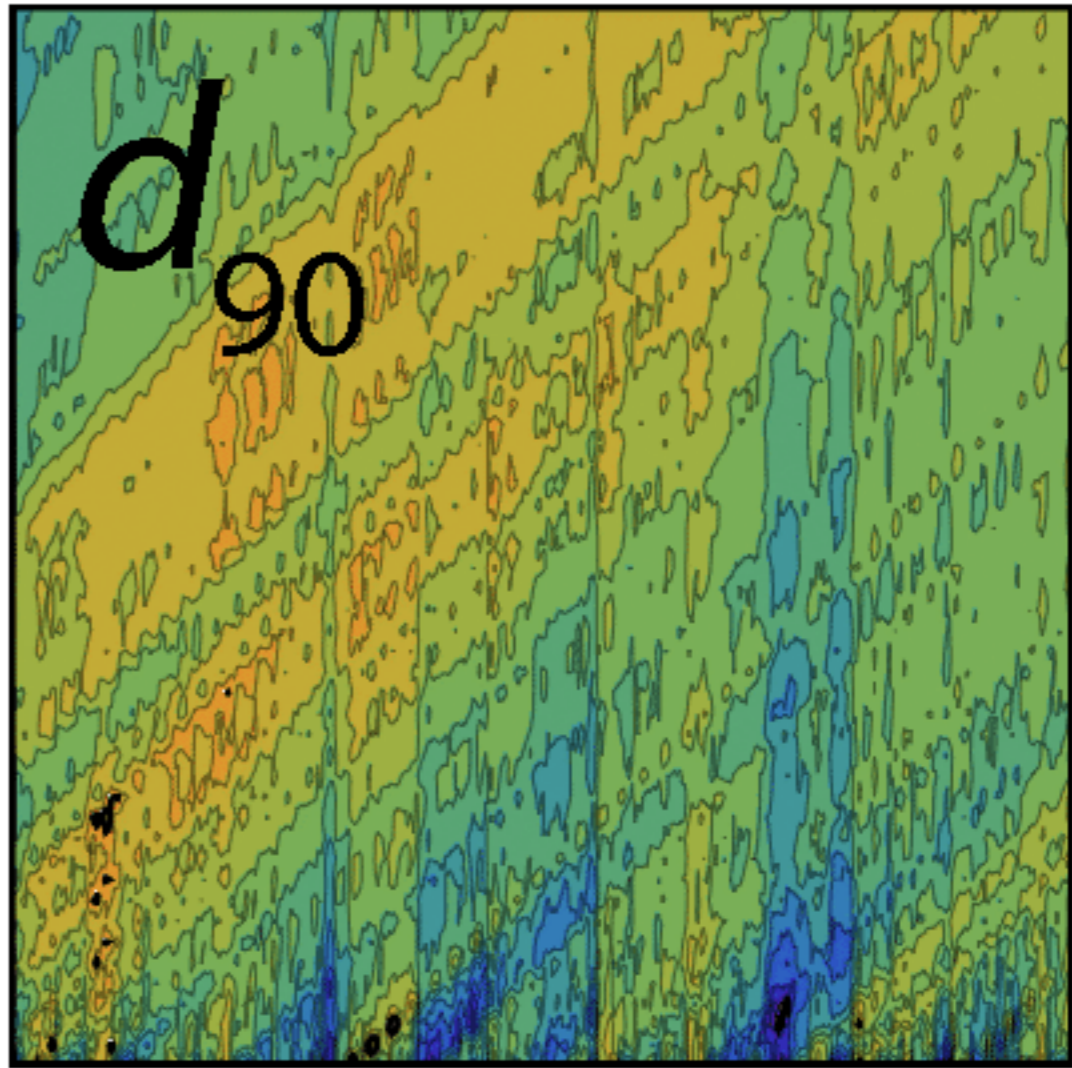

# *Quercus velutina*

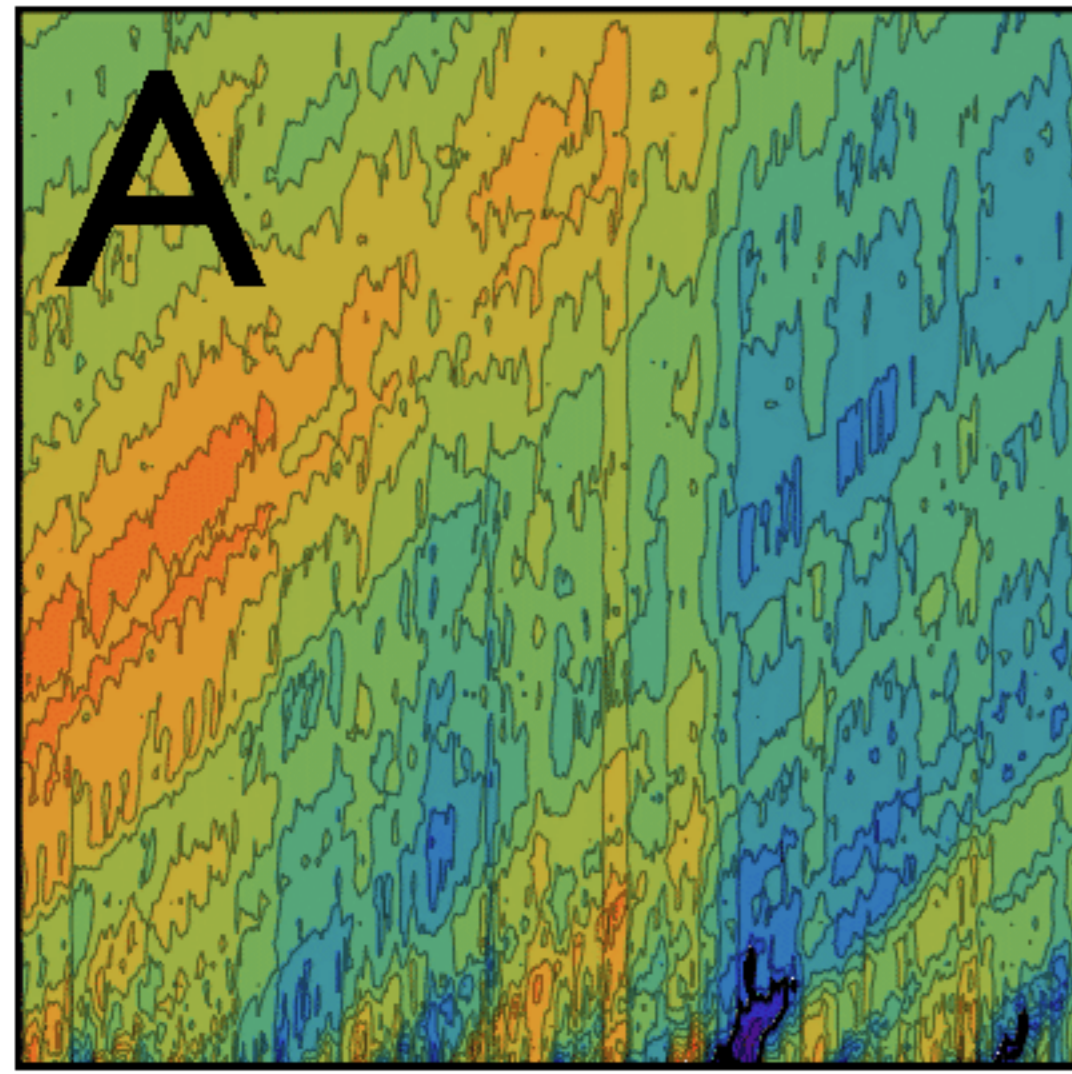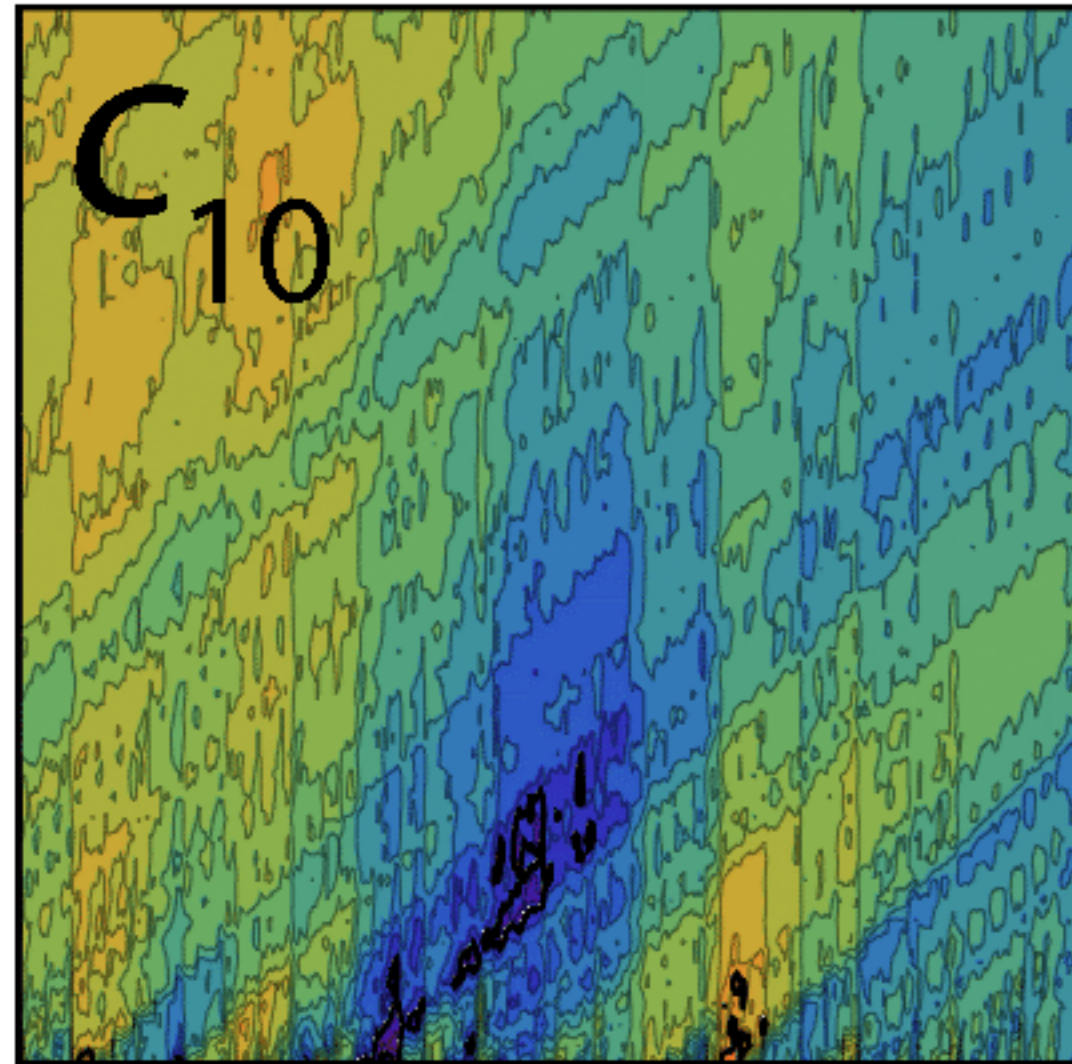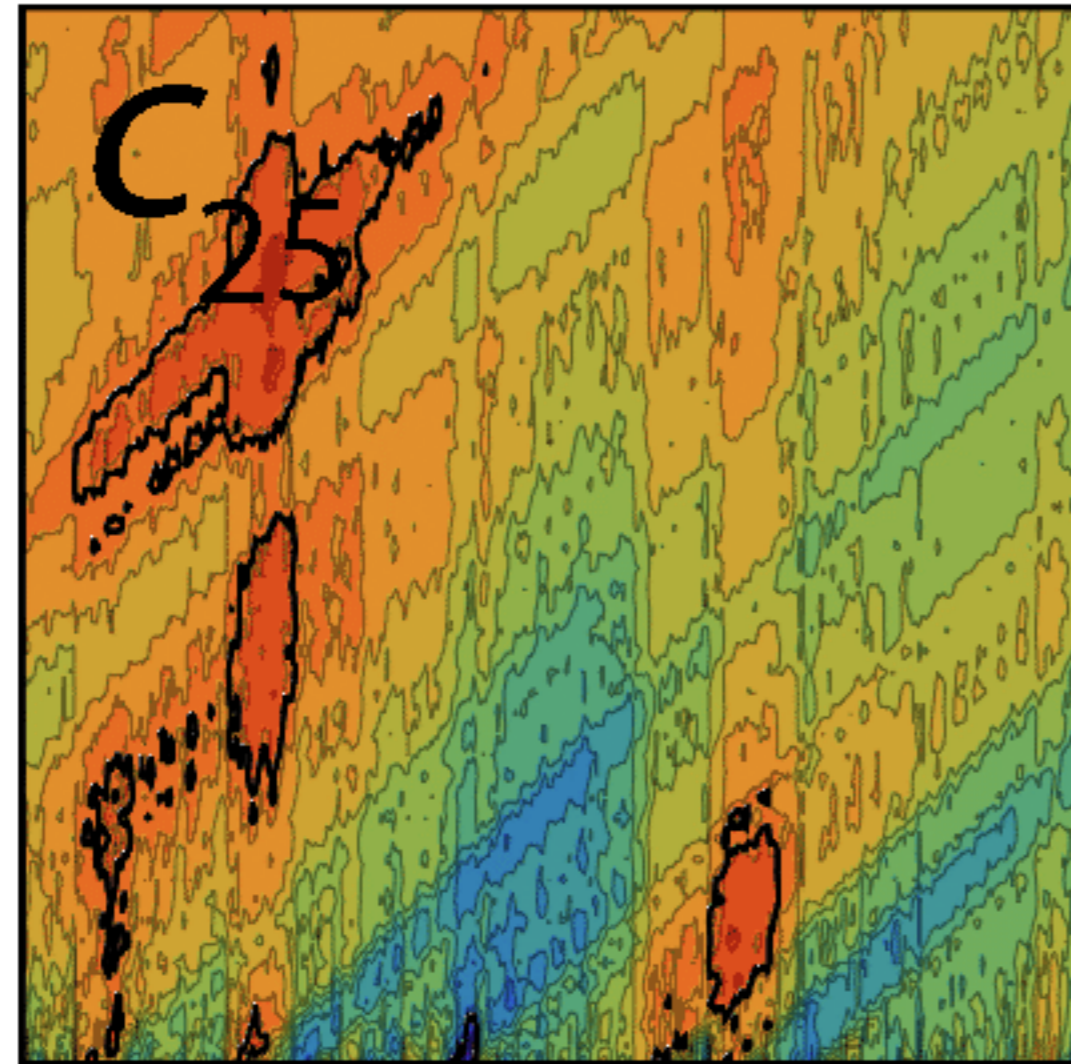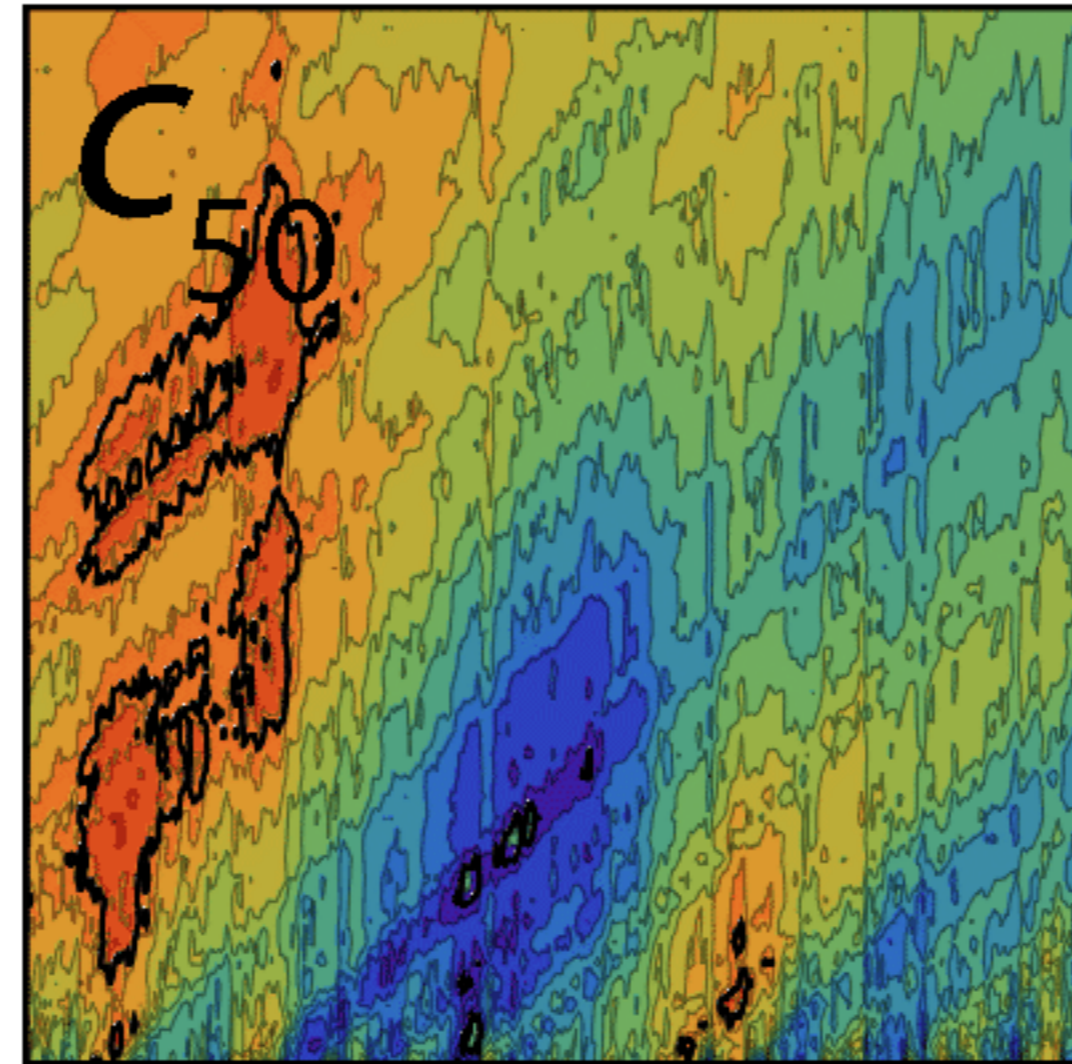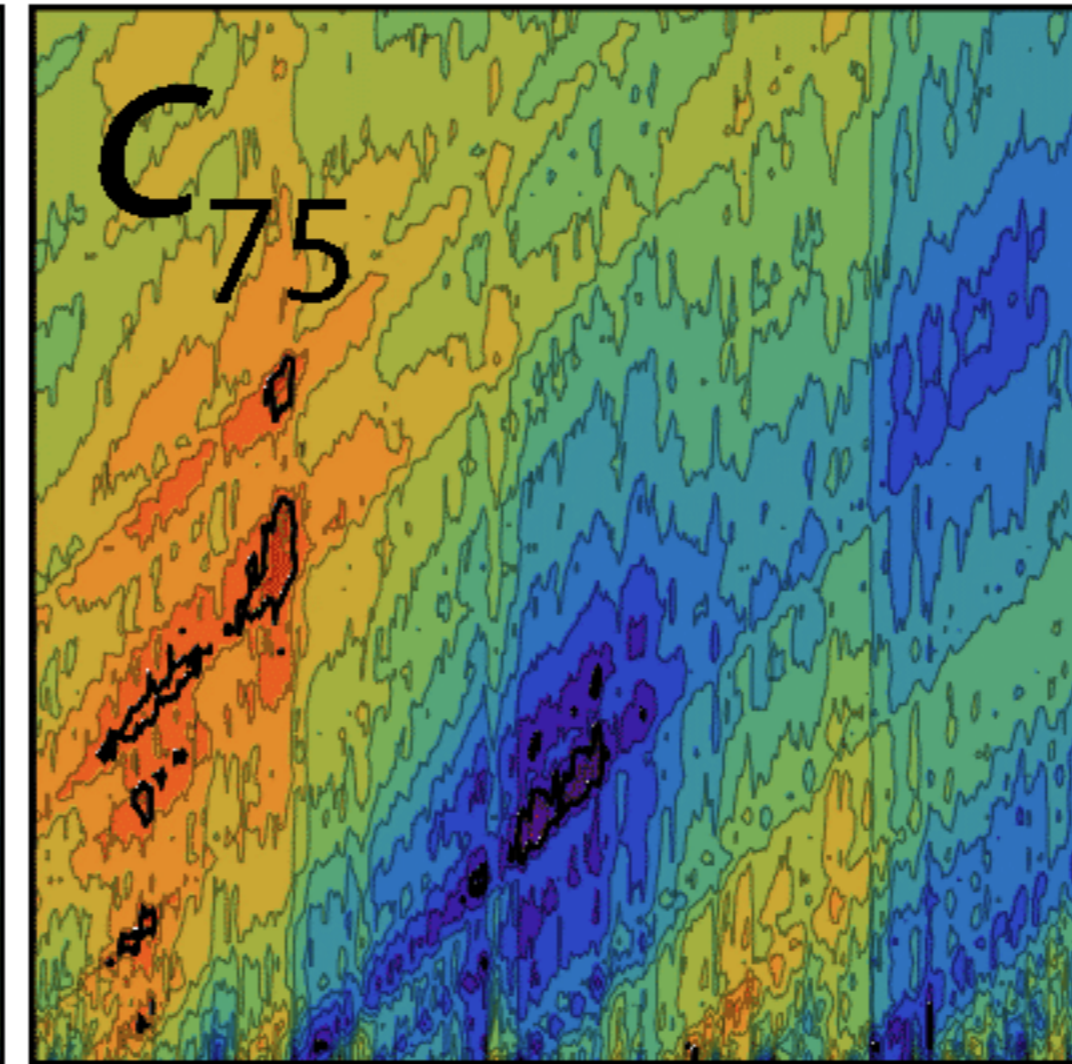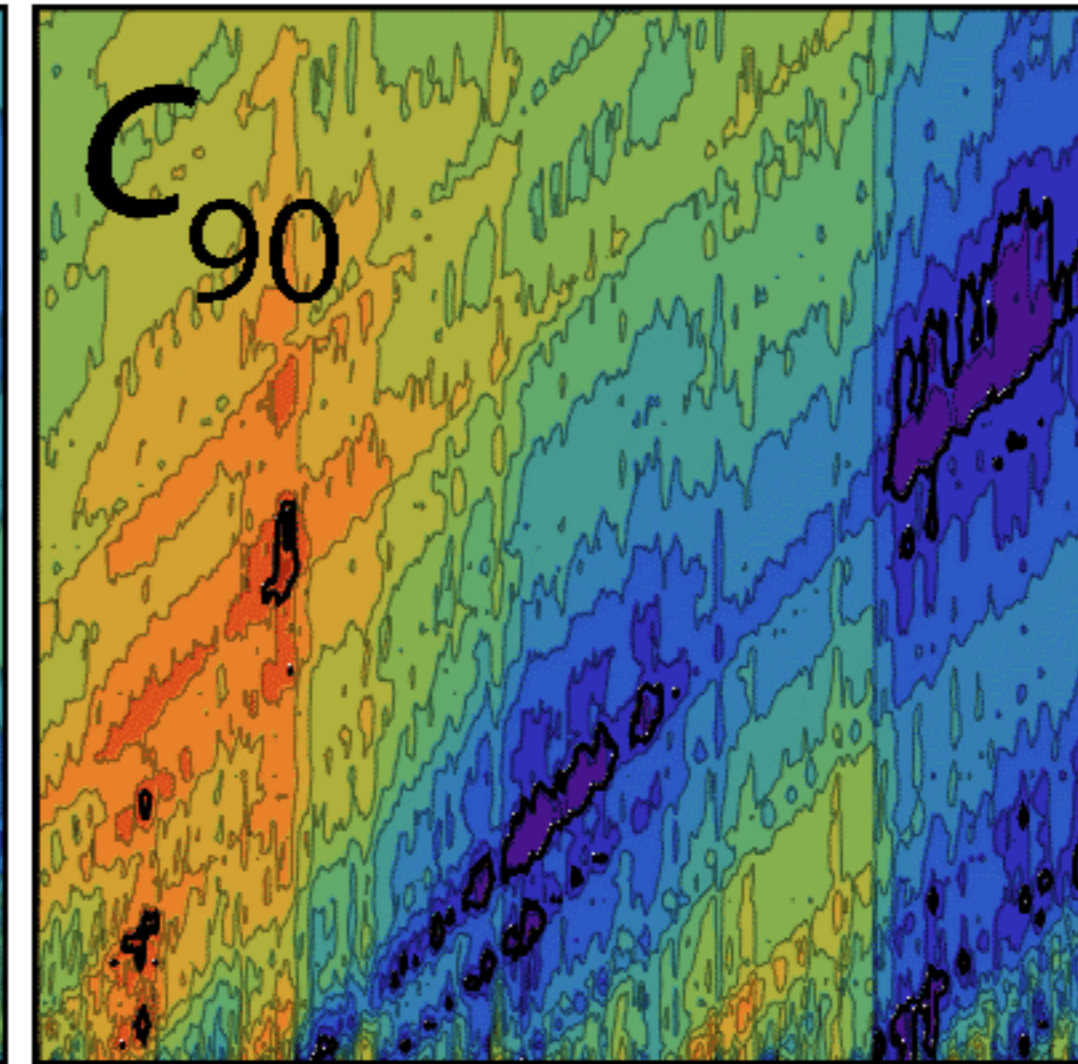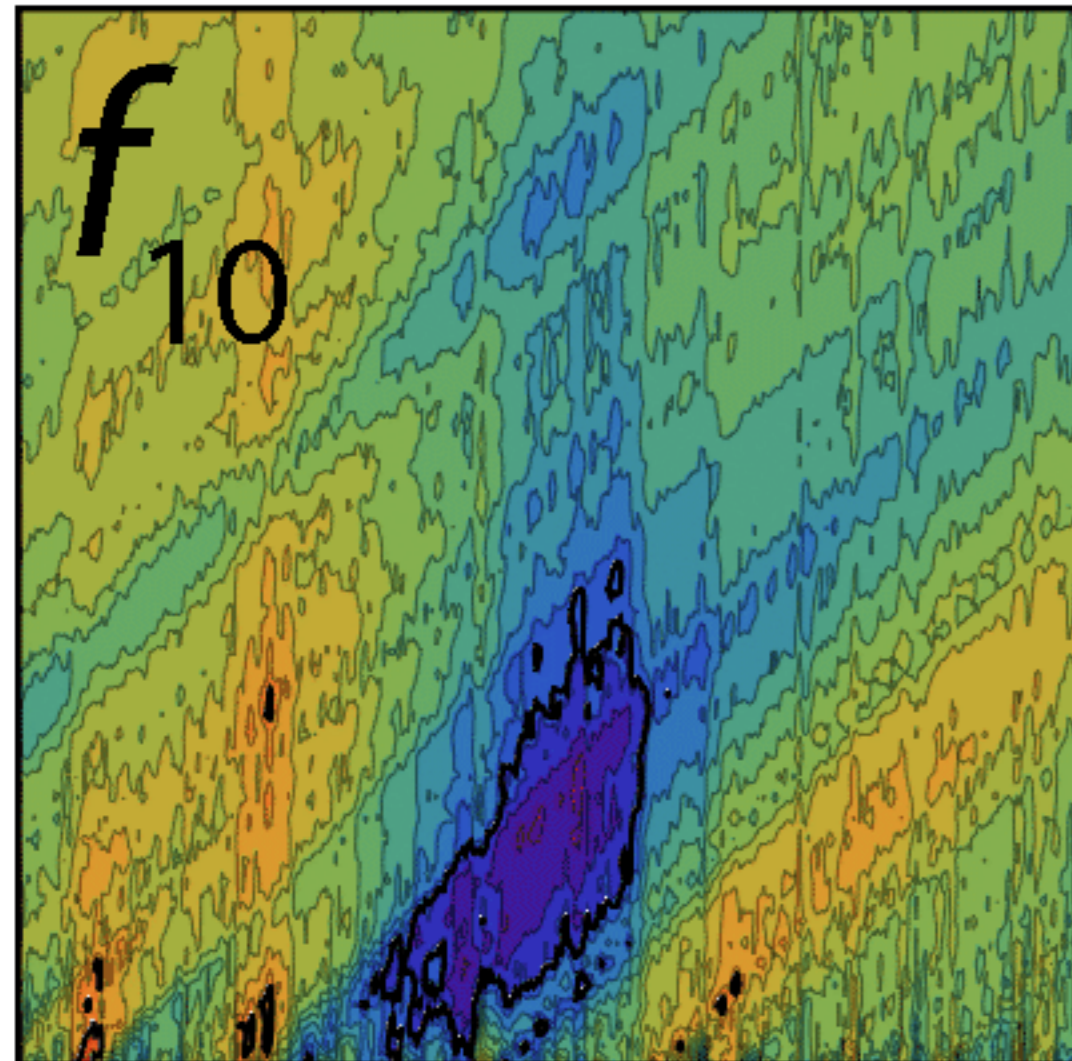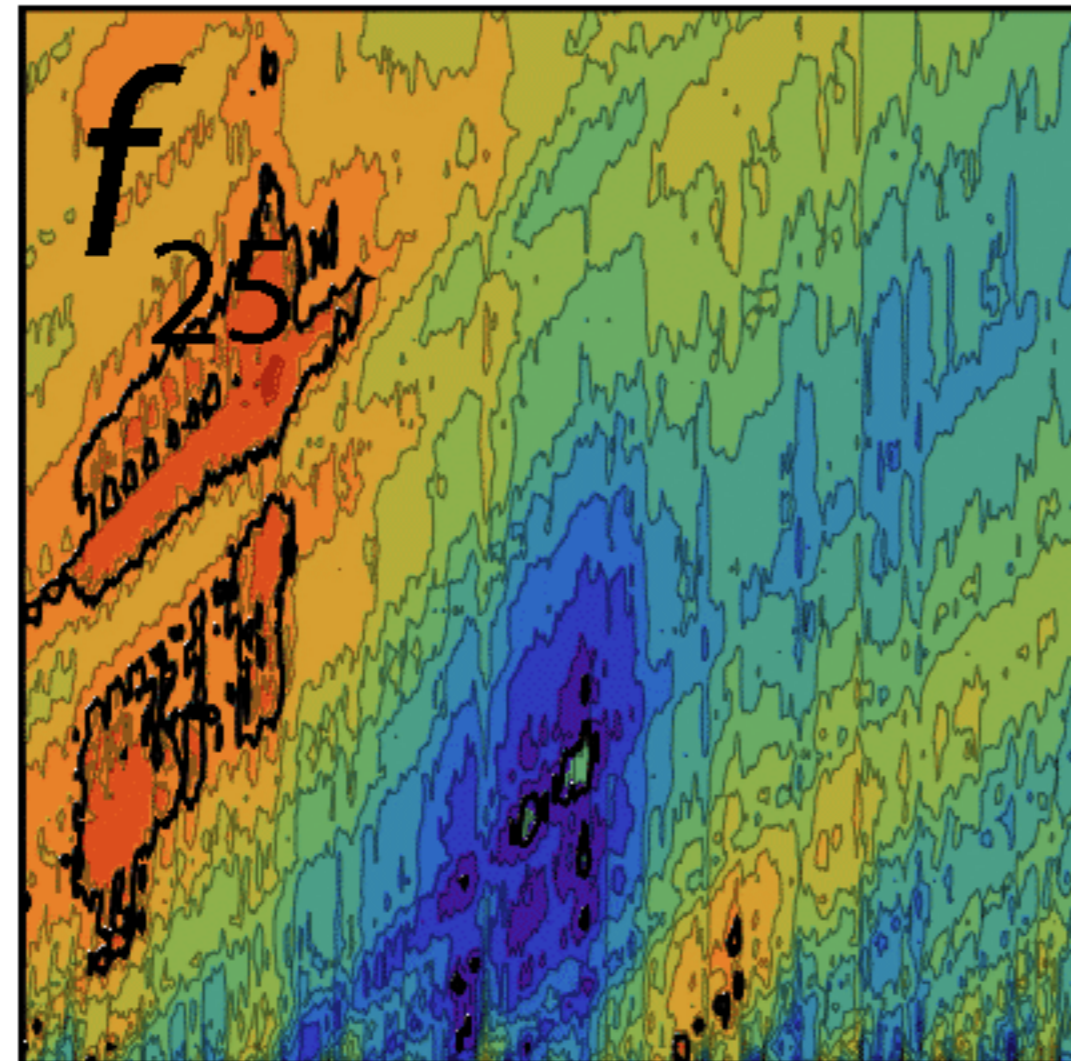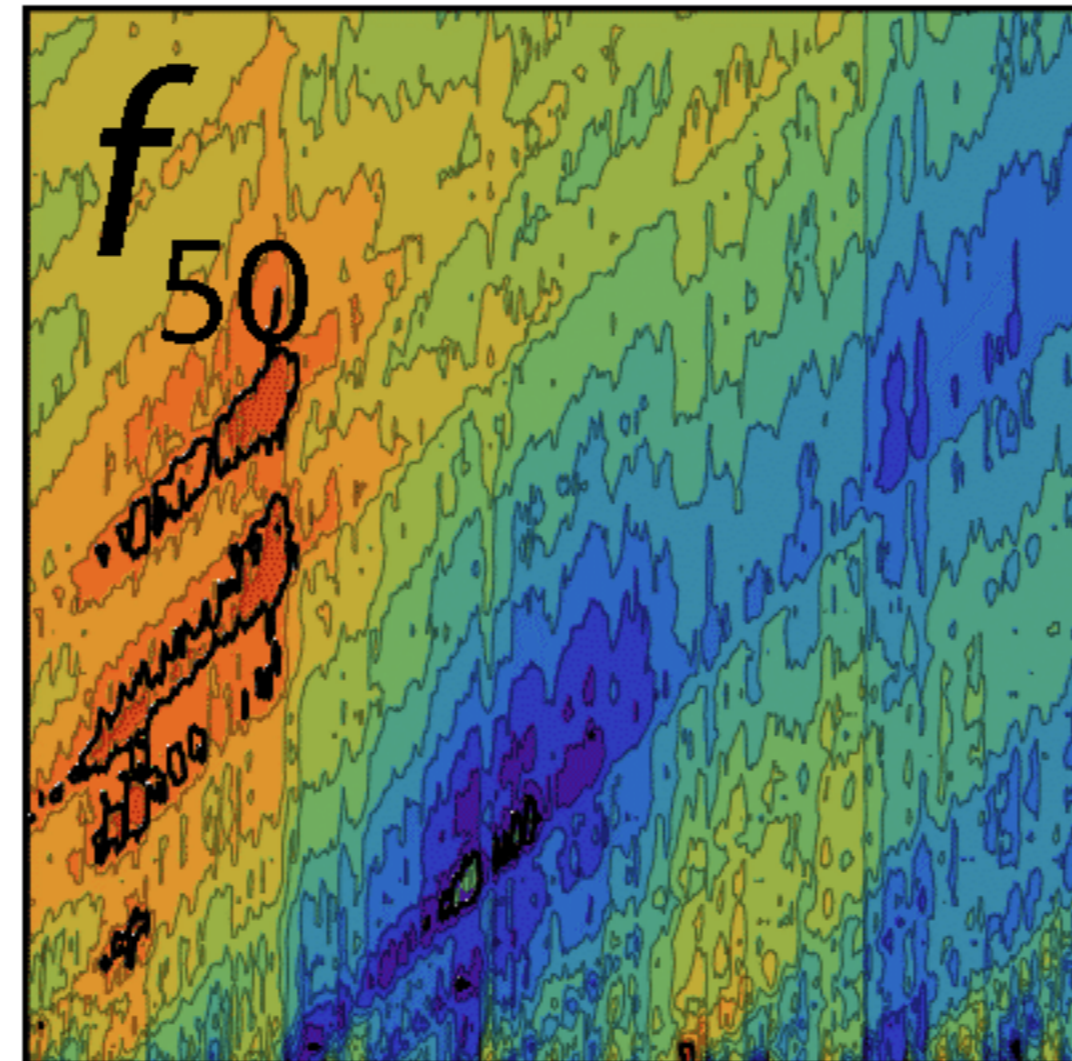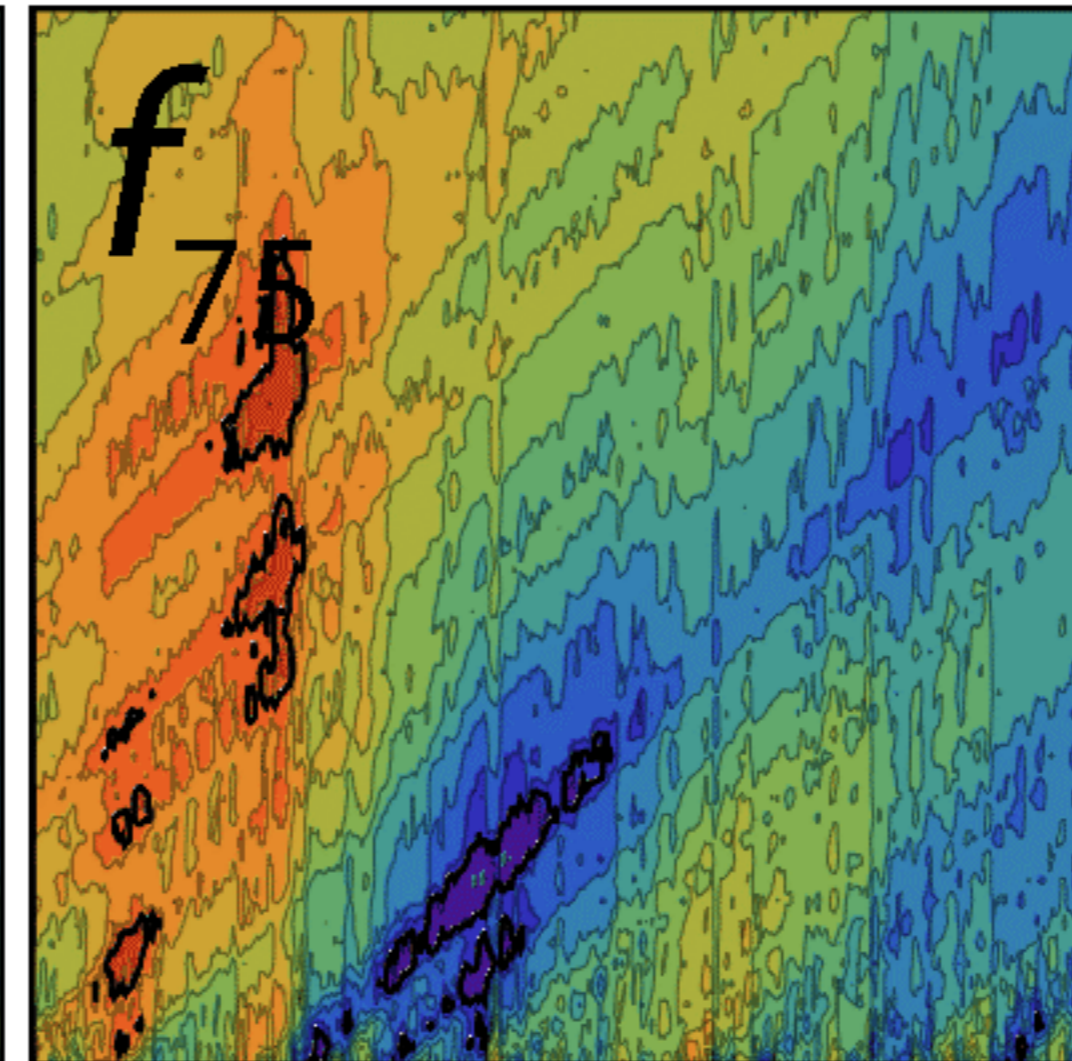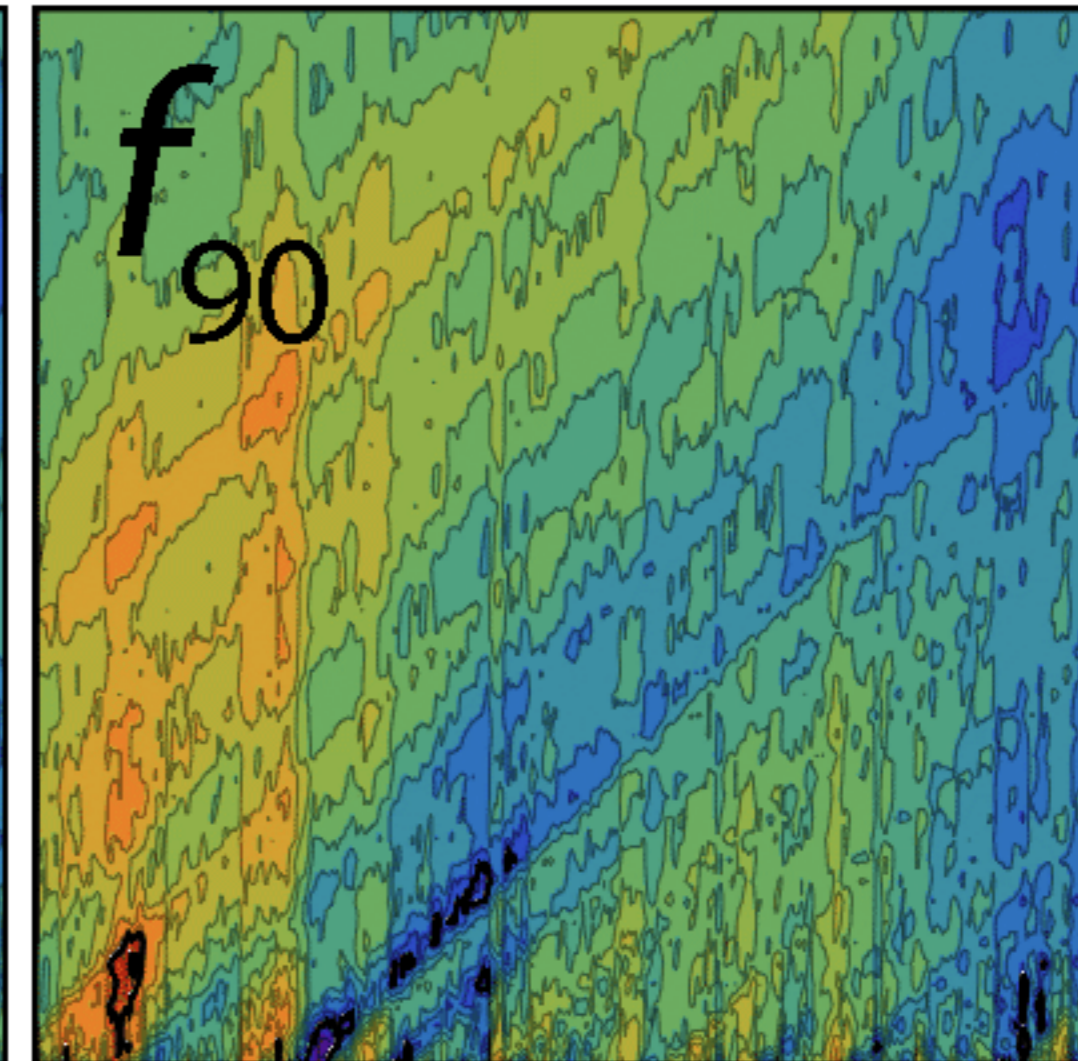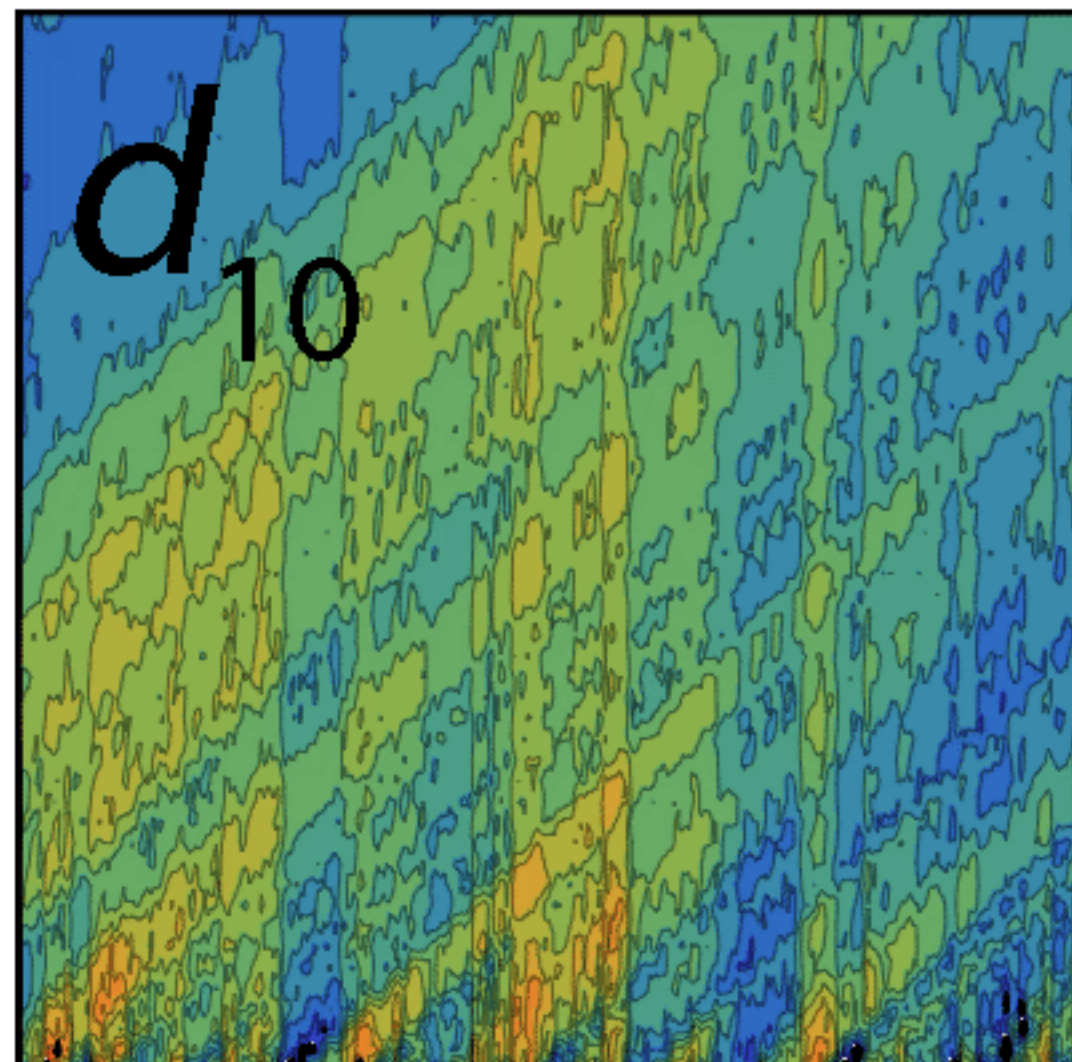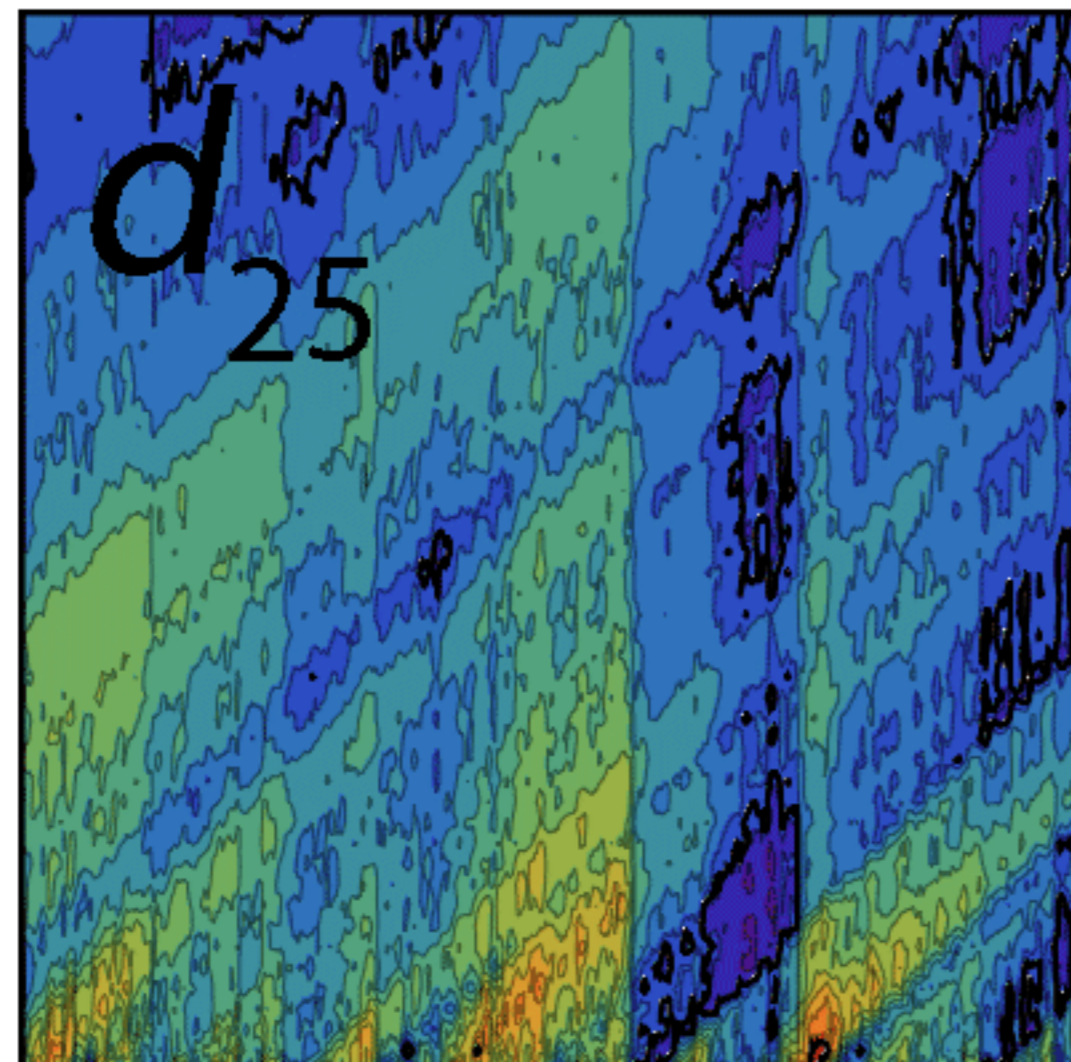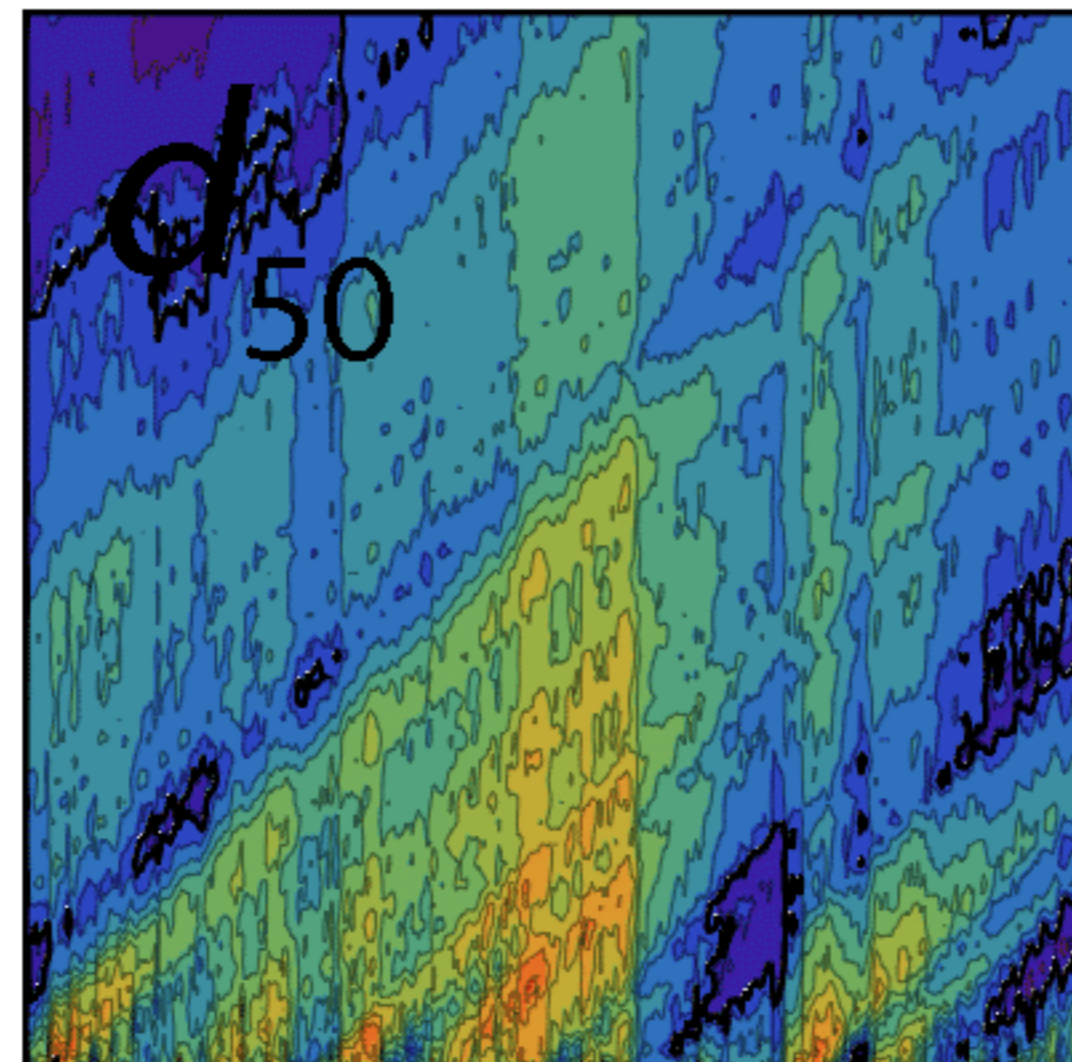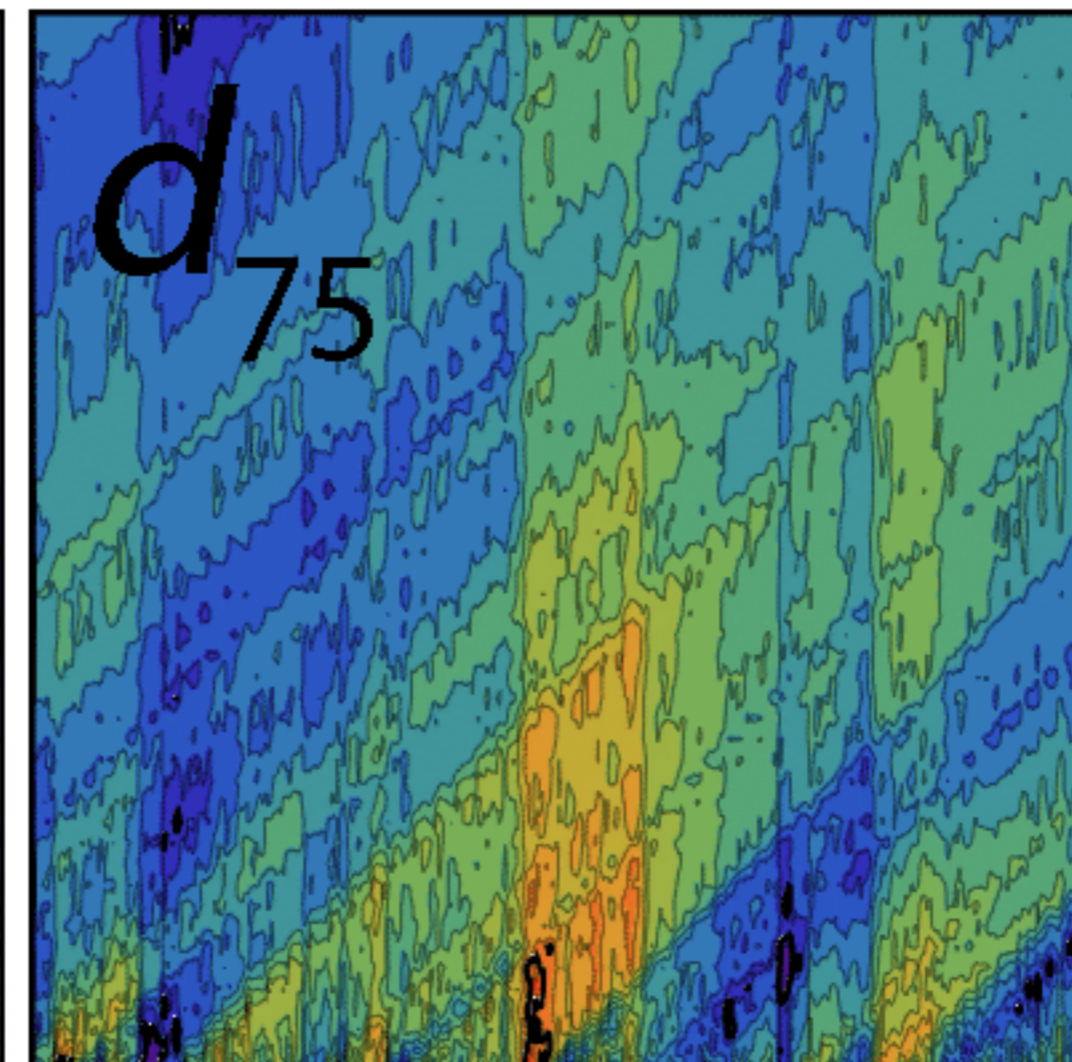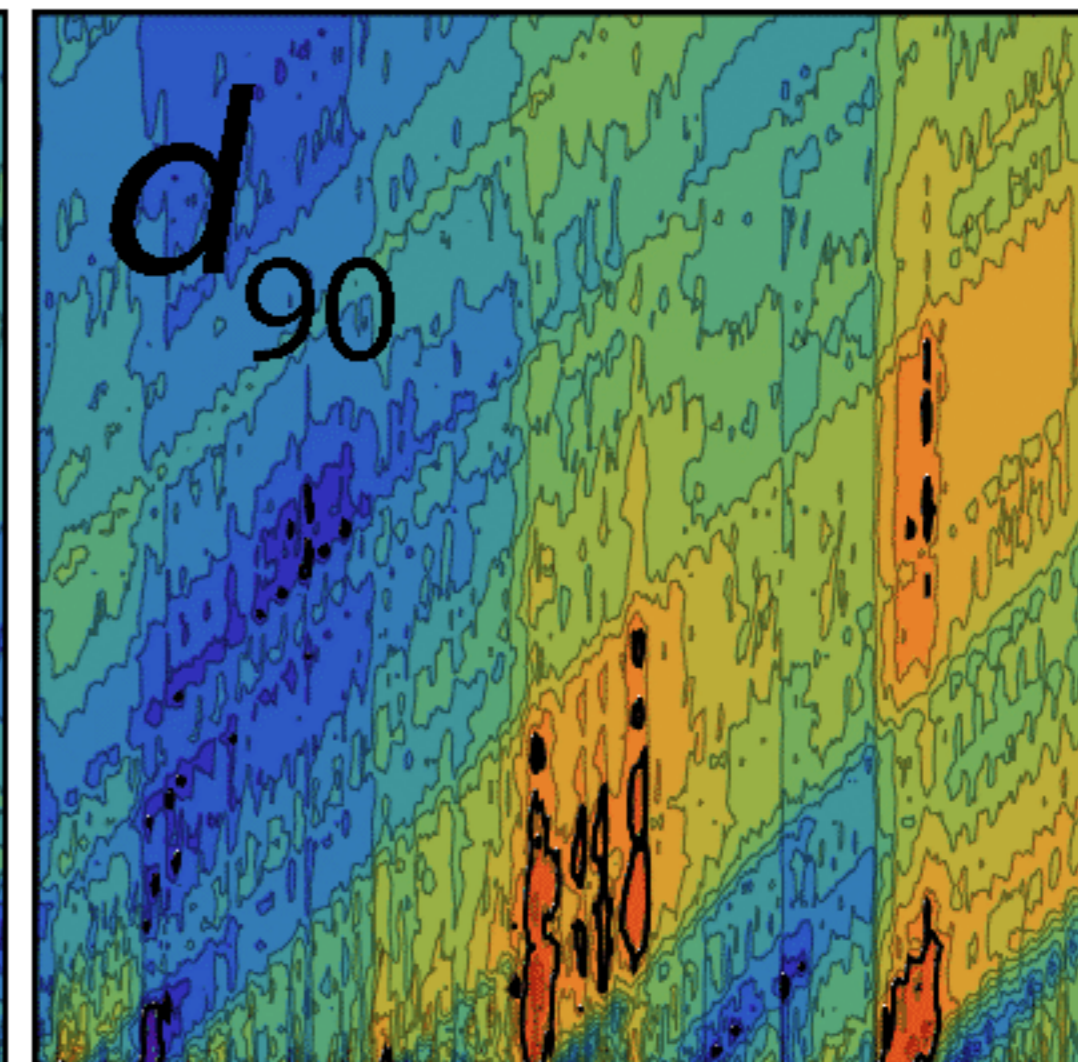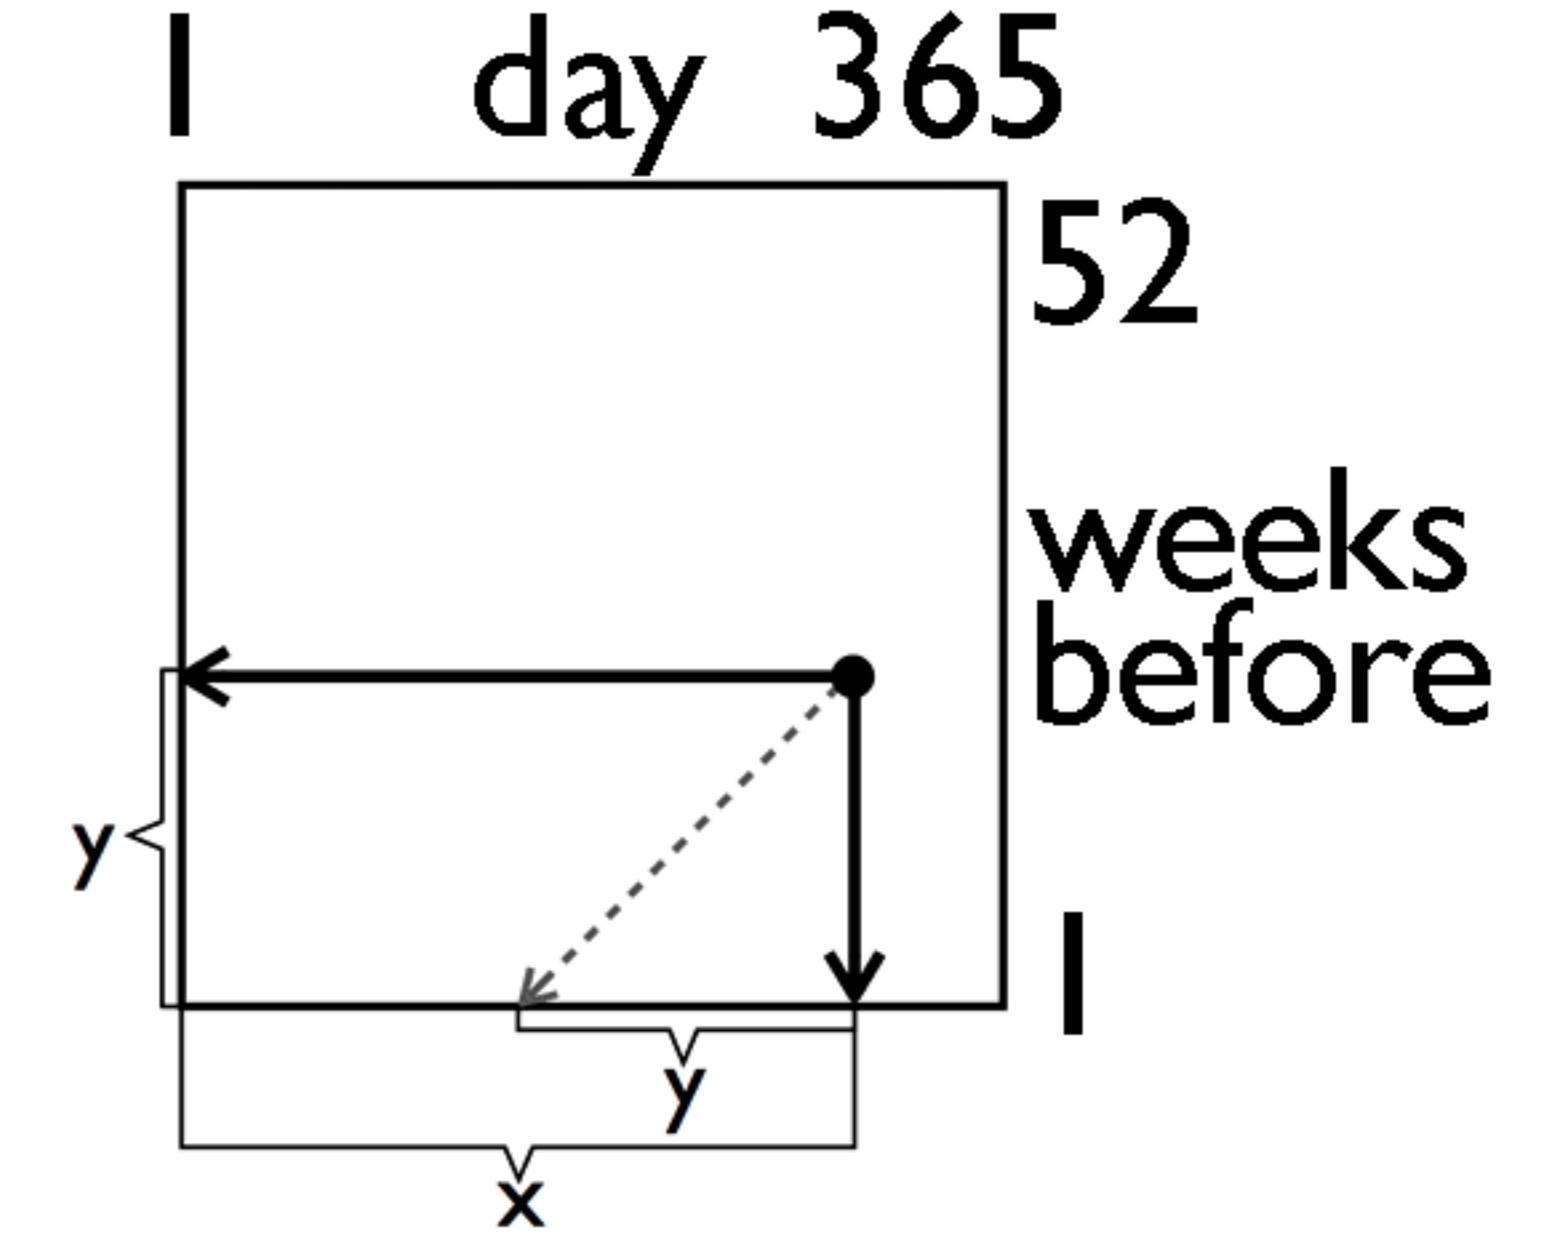

Supplement: pone.0057373.s002.pdf [file pone.0057373.s002.pdf]
